# Supplementary material for: Transcriptional Insight Into Brassica napus Resistance Genes LepR3 and Rlm2-Mediated Defense Response Against the Leptosphaeria maculans Infection
Source: Front Plant Sci. 2019 Jul 2;10:823. doi: 10.3389/fpls.2019.00823 (PMC6615431; doi:10.3389/fpls.2019.00823)
Supplement: Supplementary file 2 [file Table_2.xlsx]

## Sheet: Sheet2
Table S2. Summary of total RNA-seq reads aligned to B. napus reference exome in all biological replicates for each studied sample.
Sample		Total reads aligned to Brassica exome	Percentage of B. napus mapped reads to total RNA-seq generated reads	Pecentage of B. napus mapped reads to totally combined host and pathogen mapped reads	Fold coverage of B. napus mapped reads to B. napus exome
L. maculan isolates	B. napus lines or in vitro culture
Water	Westar	25316645	0.730833	N/A	27.0492
03-42-06	Westar	23936417	0.720867	0.960847	25.5746
87-41	Westar	23726943	0.736967	0.97203	25.3508
03-15-03	Westar	25098677	0.720833	0.934462	26.8164
PG4-1-M	Westar	24752814	0.722567	0.985846	26.4468
Water	TLepR3	24039212	0.7457	N/A	25.6844
03-42-06	TLepR3	25258856	0.723633	0.973004	26.9875
87-41	TLepR3	23522582	0.716733	0.972384	25.1324
03-15-03	TLepR3	24187343	0.722267	0.930634	25.8427
PG4-1-M	TLepR3	26855969	0.73495	0.98144	28.6939
Water	T35SLepR3	24416239	0.7443	N/A	26.0872
03-42-06	T35SLepR3	24179253	0.713067	0.986294	25.834
87-41	T35SLepR3	22122716	0.719967	0.940026	23.6367
03-15-03	T35SLepR3	23699296	0.708433	0.957345	25.3212
PG4-1-M	T35SLepR3	25173214	0.719967	0.975344	26.896
Water	TRlm2	24897846	0.734167	N/A	26.6018
03-42-06	TRlm2	22268287	0.7114	0.95415	23.7923
87-41	TRlm2	23090271	0.710933	0.968729	24.6705
03-15-03	TRlm2	22484566	0.723133	0.967914	24.0234
PG4-1-M	TRlm2	26007366	0.71775	0.97101	27.7872
The total numbers of aligned reads are reported for each experimental treatment. n/a; not applicable.
The Brassica unigene set has a total of 112,313,557 bp.
