# Supplementary material for: Transcriptional Insight Into Brassica napus Resistance Genes LepR3 and Rlm2-Mediated Defense Response Against the Leptosphaeria maculans Infection
Source: Front Plant Sci. 2019 Jul 2;10:823. doi: 10.3389/fpls.2019.00823 (PMC6615431; doi:10.3389/fpls.2019.00823)
Supplement: Supplementary file 3 [file Table_3.xlsx]

## Sheet: Incomp vs Basal_up_DEGs
Table S3. Identificaiton and annotation of DEGs among comparisons of 'Basal', 'Comp' and 'Incomp' in B. napus.
Up-regulated DEGs identified by comparing 'Incomp' versus 'Basal'.
Gene_ID	Annotation	Log2_fold_change	padj
BnaC05g14950D	Pathogenesis-related thaumatin superfamily protein	5.13112	9.34932e-24
BnaA02g06090D	Serine carboxypeptidase-like 47	4.91676	4.5074e-17
BnaA05g26640D	Basic endochitinase B	4.28632	4.28178e-35
BnaA07g20550D	VQ motif-containing protein 10	4.0444	6.36123e-21
BnaC05g40680D	Basic endochitinase B	4.01957	3.25709e-35
BnaA10g24230D	Peroxidase 54	3.98121	4.34269e-21
BnaC01g38190D	2-oxoglutarate (2OG) and Fe(II)-dependent oxygenase superfamily protein	3.94073	1.45901e-11
BnaA09g15610D	Late embryogenesis abundant (LEA) protein-related	3.92846	9.8959e-18
BnaC08g35300D	cysteine-rich RLK (RECEPTOR-like protein kinase) 15	3.85437	2.30307e-12
BnaA09g00450D	Probable glycerol-3-phosphate acyltransferase 3	3.8177	1.75632e-11
BnaA06g13410D	Pathogenesis-related thaumatin superfamily protein	3.71775	5.45592e-12
BnaA07g21130D	extensin-like	3.71227	2.55626e-08
BnaA03g01790D	cytochrome P450 71A1-like	3.68716	1.39896e-10
BnaA07g09830D	Beta carbonic anhydrase 3	3.66069	1.23107e-08
BnaC06g22120D	Defensin-like protein 17	3.65387	1.29314e-10
BnaAnng35430D	Cellulose synthase-like protein G2	3.62647	1.46632e-10
BnaA02g21660D	osmotin-like protein OSM34	3.61439	8.7357e-11
BnaA06g04390D	LOB domain-containing protein 1	3.57921	1.68379e-16
BnaC02g09180D	Peroxidase 58	3.54765	2.6688e-36
BnaC01g09550D	Phosphorylase superfamily protein	3.54283	1.01418e-18
BnaC03g33890D	pathogenesis-related protein	3.53592	1.63553e-11
BnaC05g03090D	receptor like protein 54	3.52034	8.45216e-09
BnaA05g03200D	Eukaryotic aspartyl protease family protein	3.50448	5.38216e-11
BnaA03g21640D	Short-chain dehydrogenase reductase 3a	3.49396	3.81842e-20
BnaA03g20300D	Chitinase family protein	3.49084	6.83048e-12
BnaC04g53030D	chitinase, putative	3.49018	9.33732e-11
BnaA04g18870D	receptor like protein 24	3.48998	2.59301e-15
BnaA09g28450D	myb domain protein 116	3.48772	3.92535e-14
BnaC06g37480D	Calcium-binding protein CML39	3.48695	7.5306e-10
BnaC07g26970D	flowering-promoting factor 1-like protein 1	3.48214	8.64164e-08
BnaA10g04840D	Protein phosphatase 2C 3	3.47906	2.52666e-08
BnaC04g03770D	Beta-glucosidase 32	3.47329	1.31814e-08
BnaC03g72480D	Short-chain dehydrogenase reductase 3a	3.46796	1.75921e-22
BnaC02g09170D	Peroxidase 58	3.45548	8.70162e-15
BnaA06g10230D	ABC transporter G family member 40	3.42801	2.5351e-08
BnaC06g28130D	Protein kinase superfamily protein	3.41665	5.67754e-08
BnaC05g11890D	ABC transporter G family member 40	3.40769	8.15034e-09
BnaC04g15320D	Glutamate receptor 2.8	3.37838	4.28937e-07
BnaC09g09800D	Cytochrome P450 71B2	3.37067	4.03042e-08
BnaA02g04550D	Peroxidase 58	3.3229	6.48471e-07
BnaA06g20910D	alpha/beta-Hydrolases superfamily protein	3.31892	1.28625e-06
BnaA02g18220D	ERAD-associated E3 ubiquitin-protein ligase component HRD3B	3.30355	3.29243e-06
BnaC01g26790D	Sugar transporter ERD6-like 5	3.27196	4.80506e-08
BnaA04g04370D	PAR1 protein	3.26047	1.20896e-08
BnaC09g16220D	Late embryogenesis abundant (LEA) protein-related	3.25354	5.12748e-13
BnaC09g48850D	Peroxidase 54	3.25334	5.30152e-15
BnaC04g03790D	Beta-glucosidase 27	3.24121	1.64882e-07
BnaA05g36230D	Cysteine-rich repeat secretory protein 38	3.22242	2.2005e-12
BnaA09g55490D	Beta-glucosidase 27	3.21801	3.07575e-14
BnaA06g33980D	Nucleic acid-binding, OB-fold-like protein	3.21328	3.62625e-06
BnaC07g25860D	Phenolic glucoside malonyltransferase 2	3.202	1.10753e-18
BnaC06g20410D	VQ motif-containing protein 10	3.19465	1.02885e-11
BnaC05g37420D	Probable lipid desaturase ADS3.2, chloroplastic	3.19256	2.24894e-07
BnaC06g23700D	kunitz trypsin inhibitor 1	3.19249	6.6433e-17
BnaA06g36650D	glu S.griseus protease inhibitor-like	3.18353	1.55942e-08
BnaCnng24530D	Putative zinc transporter At3g08650	3.17193	3.17452e-07
BnaAnng14900D	Two-component response regulator ARR10	3.17175	3.22635e-08
BnaA07g17230D	beta-1,3-glucanase 3	3.1704	1.163e-10
BnaC05g12280D	Wall-associated receptor kinase-like 6	3.157	5.75277e-07
BnaCnng41750D	Alpha-barbatene synthase	3.15115	5.70852e-10
BnaA07g36940D	myb domain protein 116	3.14268	1.07497e-09
BnaA09g49180D	LOB domain-containing protein 1	3.12085	1.1474e-26
BnaC02g38400D	Nitrile-specifier protein 5	3.10538	2.4218e-18
BnaA03g04160D	Probable WRKY transcription factor 75	3.09596	4.9808e-16
BnaA02g19970D	Lactoylglutathione lyase / glyoxalase I family protein	3.09153	1.31952e-07
BnaC03g05760D	Probable WRKY transcription factor 75	3.08932	7.20532e-18
BnaC09g20500D	Encodes a protein whose expression is responsive to nematode infection.	3.08844	3.80127e-07
BnaC04g25200D	jasmonate-regulated gene 21	3.08749	4.03042e-08
BnaC05g09070D	Cytochrome P450 71B7	3.08409	4.71544e-13
BnaA04g25210D	receptor serine/threonine kinase, putative	3.07529	1.48778e-09
BnaCnng49630D	Cytochrome P450 71B2	3.07388	2.03463e-08
BnaC04g52860D	Eukaryotic aspartyl protease family protein	3.06705	2.69487e-07
BnaCnng33720D	probable polyamine oxidase 5	3.06562	4.03042e-08
BnaA01g01190D	Sec14p-like phosphatidylinositol transfer family protein	3.05907	2.29288e-06
BnaA01g01200D	Sec14p-like phosphatidylinositol transfer family protein	3.04447	3.41004e-07
BnaC04g31950D	#N/A	3.0409	2.60401e-05
BnaC02g42660D	Pyruvate kinase family protein	3.03823	2.56957e-21
BnaC03g24290D	Chitinase family protein	3.02707	3.734e-06
BnaC05g00530D	1-aminocyclopropane-1-carboxylate synthase 2	3.01311	8.58278e-10
BnaC07g49990D	Probable galacturonosyltransferase-like 2	3.00394	4.38039e-11
BnaC08g43470D	LOB domain-containing protein 1	3.00259	1.26356e-08
BnaA02g35760D	Glutathione S-transferase U12	3.00175	2.27321e-09
BnaA02g10950D	Actin-depolymerizing factor 12	2.99917	4.12491e-10
BnaA04g07850D	NDR1/HIN1-like 25	2.99195	1.7692e-06
BnaC05g05180D	Protein phosphatase 2C 3	2.98421	1.12203e-08
BnaA06g31400D	P-loop containing nucleoside triphosphate hydrolases superfamily protein	2.97811	3.94007e-05
BnaA09g00460D	#N/A	2.97123	4.71484e-05
BnaA01g07970D	Phosphorylase superfamily protein	2.96929	3.52445e-11
BnaA09g36610D	Glucan endo-1,3-beta-glucosidase, acidic isoform	2.92108	5.88621e-08
BnaA04g01370D	Beta-glucosidase 16	2.91047	9.17262e-07
BnaCnng24520D	ethylene-responsive transcription factor ERF114	2.90972	7.20315e-11
BnaC05g46390D	Sugar transporter ERD6-like 12	2.89095	8.58664e-08
BnaC08g42370D	#N/A	2.88403	1.35771e-08
BnaA06g13430D	Pathogenesis-related thaumatin superfamily protein	2.87256	1.22442e-05
BnaA10g23450D	protein LURP-one-related 10-like	2.87074	8.70162e-15
BnaC04g49080D	receptor serine/threonine kinase, putative	2.8698	1.98293e-10
BnaC01g26050D	Cysteine proteinases superfamily protein	2.86092	5.70767e-10
BnaC03g74050D	Adenosylhomocysteinase 2	2.84373	2.58424e-21
BnaC05g05560D	LOB domain-containing protein 1	2.82997	5.97119e-09
BnaC06g12640D	#N/A	2.82365	3.2604e-05
BnaC02g45000D	Actin-depolymerizing factor 12	2.81573	1.29314e-10
BnaC04g38140D	receptor like protein 32	2.81521	2.55527e-06
BnaC07g27590D	Probable WRKY transcription factor 33	2.81375	5.25829e-10
BnaC03g77410D	alpha/beta-Hydrolases superfamily protein	2.80323	6.23902e-05
BnaA02g03210D	Probably inactive leucine-rich repeat receptor-like protein kinase At5g48380	2.80312	4.34506e-07
BnaA03g28770D	pathogenesis-related protein	2.8004	2.07564e-06
BnaC01g21080D	Lactate/malate dehydrogenase family protein	2.79548	4.3076e-10
BnaA08g00970D	GDSL esterase/lipase 3	2.7799	3.58092e-10
BnaCnng73840D	glutathione S-transferase T3-like	2.77839	3.17452e-05
BnaA09g54080D	Probable WRKY transcription factor 65	2.77666	2.60832e-13
BnaA07g29850D	ACT-like protein tyrosine kinase family protein	2.77479	5.48376e-06
BnaC09g47660D	Serine carboxypeptidase-like 35	2.7663	1.50205e-07
BnaC06g21260D	extensin-like	2.74824	1.24983e-06
BnaCnng25340D	NDR1/HIN1-like 25	2.7436	0.000285642
BnaC06g31040D	Glutathione S-transferase U11	2.73906	1.54012e-13
BnaA10g20210D	Probable WRKY transcription factor 75	2.73304	1.18618e-06
BnaA05g03420D	chitinase, putative	2.70072	2.77713e-06
BnaC05g39200D	9-cis-epoxycarotenoid dioxygenase NCED3, chloroplastic	2.69961	1.34782e-07
BnaA09g03390D	Kunitz family trypsin and protease inhibitor protein	2.69554	0.000441716
BnaC07g38730D	Metal-nicotianamine transporter YSL1	2.69479	5.67754e-08
BnaC04g47920D	cytochrome p450 79c2	2.69153	2.83914e-06
BnaA07g22750D	kunitz trypsin inhibitor 1	2.68735	1.52955e-15
BnaC03g49940D	Aldolase-type TIM barrel family protein	2.68079	7.51329e-12
BnaC01g31930D	DUF679 domain membrane protein 1	2.67714	0.000316854
BnaA06g07620D	Cytochrome P450 71B7	2.67175	1.29262e-07
BnaC01g36040D	NAC domain-containing protein 55	2.66448	4.81055e-07
BnaA09g02980D	Glutamate receptor 1.2	2.6613	3.62625e-06
BnaA05g08660D	EID1-like F-box protein 3	2.64596	7.41292e-05
BnaA07g03510D	S-adenosyl-L-methionine-dependent methyltransferases superfamily protein	2.63704	1.07292e-09
BnaA03g58280D	Putative ALA-interacting subunit 2	2.63296	0.000593179
BnaA01g34540D	alpha/beta-Hydrolases superfamily protein	2.62889	2.08735e-05
BnaA01g34980D	Glycosyl hydrolase family protein with chitinase insertion domain	2.62343	1.10753e-18
BnaC04g36030D	Methylesterase 4	2.61242	1.33035e-15
BnaC01g41330D	Nucleotide-diphospho-sugar transferase, predicted	2.61231	9.74197e-08
BnaA07g23960D	matrix metalloproteinase	2.61048	1.74682e-05
BnaCnng62240D	cytochrome P450, family 71, subfamily A, polypeptide 27	2.60581	8.22787e-06
BnaA09g18570D	Encodes a protein whose expression is responsive to nematode infection.	2.60496	1.10105e-06
BnaA04g13760D	Methylesterase 4	2.59535	3.88848e-12
BnaA07g31330D	receptor like protein 15	2.59084	6.67457e-05
BnaA05g33880D	Alpha-dioxygenase 1	2.58647	6.40836e-09
BnaA07g30710D	kunitz trypsin inhibitor 1	2.58624	1.84012e-06
BnaAnng38800D	UDP-glycosyltransferase 82A1	2.58271	0.000215489
BnaAnng07050D	Stress up-regulated Nod 19	2.57878	0.000892715
BnaC05g20360D	FAD-binding Berberine family protein	2.56979	5.69387e-09
BnaC04g22420D	Beta-glucosidase 27	2.56912	5.06372e-07
BnaAnng05060D	cysteine-rich and transmembrane domain-containing protein a-like	2.56844	0.000285642
BnaC02g13050D	putative lipid-transfer protein DIR1	2.56186	3.93504e-06
BnaA03g31840D	#N/A	2.561	8.03291e-07
BnaA09g29740D	#N/A	2.56091	0.000203651
BnaC05g14820D	Probable carboxylesterase 1	2.55824	1.52886e-14
BnaA05g11410D	LOB domain-containing protein 14	2.55763	1.39864e-05
BnaC06g03190D	root hair specific 6	2.55342	0.00072004
BnaA05g12930D	NDR1/HIN1-like 25	2.55121	1.33865e-08
BnaC02g28140D	Late embryogenesis abundant 3 (LEA3) family protein	2.54677	0.000433801
BnaA05g20940D	NEP-interacting protein 1	2.53532	1.19068e-06
BnaC08g28310D	Glycosyltransferase family 61 protein	2.53483	4.59396e-06
BnaC09g48120D	protein LURP-one-related 10-like	2.53327	5.70767e-10
BnaC03g33900D	Hevein-like preproprotein	2.53314	2.28784e-08
BnaA06g30780D	Phenolic glucoside malonyltransferase 2	2.53064	5.78652e-12
BnaA03g23120D	Bifunctional dihydrofolate reductase/thymidylate synthase	2.52425	0.000493004
BnaA01g03020D	UDP-glycosyltransferase 73B3	2.52016	0.00141199
BnaA02g35970D	Isoflavone reductase homolog P3	2.51949	1.10631e-08
BnaA03g40930D	Probable galacturonosyltransferase-like 2	2.51761	2.1362e-13
BnaCnng21690D	Bifunctional UDP-glucose 4-epimerase and UDP-xylose 4-epimerase 1	2.51459	0.00153436
BnaC01g22200D	drought-induced 21	2.51357	0.00074424
BnaC07g12450D	#N/A	2.50445	0.000120028
BnaA04g06980D	Putative cysteine-rich receptor-like protein kinase 23	2.50164	5.25829e-10
BnaA05g04050D	Beta-glucosidase 32	2.5014	0.00116536
BnaA07g36950D	L-arabinokinase	2.50033	1.4562e-10
BnaA03g39380D	UDP-glycosyltransferase 90A1	2.48564	7.72976e-09
BnaA06g33710D	Glycosyltransferase family 61 protein	2.48114	1.86874e-05
BnaA03g46460D	Metal-nicotianamine transporter YSL1	2.48095	4.0937e-06
BnaA05g07070D	Zinc finger protein ZAT11	2.46379	1.76936e-06
BnaA08g02780D	dehydration-responsive protein rd22-like	2.46017	1.37059e-07
BnaA01g28930D	NAC domain-containing protein 55	2.45857	4.34049e-05
BnaAnng39300D	GDSL esterase/lipase 3	2.44903	5.1178e-06
BnaA04g27530D	Beta-glucosidase 30	2.44517	0.00199585
BnaC09g17590D	Ethylene-responsive transcription factor ERF096	2.44201	0.00237658
BnaAnng09430D	plant U-box 24	2.43939	5.8565e-06
BnaC09g07880D	UDP-glycosyltransferase 72E3	2.4336	4.71993e-05
BnaC04g03990D	Expansin-B4	2.43038	0.00249098
BnaC04g01860D	#N/A	2.42978	0.000566061
BnaC03g63920D	Reticuline oxidase-like protein	2.42696	3.7495e-09
BnaA01g18990D	cytochrome P450, family 71, subfamily A, polypeptide 27	2.4211	8.30385e-06
BnaC09g47670D	Serine carboxypeptidase-like 35	2.41924	0.000402488
BnaC09g47880D	Peptide methionine sulfoxide reductase A2	2.41892	0.000741006
BnaA06g21000D	Cysteine proteinases superfamily protein	2.41595	0.00223346
BnaC09g54320D	Probable aquaporin SIP1-2	2.41267	0.000393062
BnaA02g37030D	Squalene epoxidase 5	2.41209	8.07789e-05
BnaCnng33000D	1-aminocyclopropane-1-carboxylate oxidase 1	2.41014	7.56884e-05
BnaA08g08970D	protein 40-3	2.40924	8.03291e-07
BnaC04g31100D	Proline dehydrogenase 2, mitochondrial	2.40416	0.000578246
BnaC04g04080D	Probable pectinesterase/pectinesterase inhibitor 17	2.40225	0.000120028
BnaCnng62410D	GDSL esterase/lipase 3	2.39656	1.00083e-05
BnaA03g58560D	Probable beta-1,3-galactosyltransferase 20	2.39639	0.0016808
BnaA08g24120D	fucosyltransferase 6	2.39367	8.28047e-05
BnaCnng08040D	Isoflavone reductase homolog P3	2.39223	3.85347e-14
BnaA09g22480D	2-oxoglutarate (2OG) and Fe(II)-dependent oxygenase superfamily protein	2.38763	0.00112549
BnaA03g31980D	plant U-box 24	2.38386	0.00326296
BnaC03g28940D	Sodium transporter HKT1	2.3825	3.45189e-06
BnaCnng25210D	FACT complex subunit SPT16	2.38095	0.00160542
BnaCnng07500D	beta-1,3-glucanase 3	2.38069	1.85542e-05
BnaC07g38400D	probable aminotransferase TAT4	2.37147	6.81125e-06
BnaC04g51450D	myb domain protein 2	2.36877	0.00104572
BnaAnng01940D	Cytosolic sulfotransferase 15	2.36778	0.00165815
BnaA08g26320D	myb domain protein 61	2.36431	3.52951e-05
BnaA05g36270D	UDP-glycosyltransferase 82A1	2.36148	0.00415254
BnaA05g02090D	#N/A	2.36068	0.000349925
BnaA03g44340D	Nucleotide-diphospho-sugar transferase, predicted	2.35994	3.85347e-14
BnaA06g26680D	Probable WRKY transcription factor 30	2.35704	3.94877e-07
BnaC05g01300D	#N/A	2.3565	0.000365168
BnaA10g07120D	early nodulin-like protein 1	2.35579	1.0963e-09
BnaA07g23490D	Nuclear transport factor 2 (NTF2) family protein	2.35391	2.17247e-07
BnaC03g73510D	plant U-box 24	2.35372	0.00421206
BnaA01g20840D	Mitogen-activated protein kinase 16	2.34782	0.00175984
BnaC03g45280D	Aminotransferase ALD1	2.34746	1.66855e-05
BnaC05g37230D	Probable isoaspartyl peptidase/L-asparaginase 2	2.34651	0.00452276
BnaA05g33290D	ARM repeat superfamily protein	2.33917	0.00228419
BnaC08g28170D	Glucan endo-1,3-beta-glucosidase, acidic isoform	2.33688	0.000423848
BnaCnng07930D	Rieske (2Fe-2S) domain-containing protein	2.33045	5.92154e-08
BnaC06g23690D	kunitz trypsin inhibitor 1	2.32959	1.37337e-08
BnaA09g15810D	Cytosolic sulfotransferase 11	2.32896	6.19675e-05
BnaC09g48830D	Probable L-type lectin-domain containing receptor kinase S.5	2.32836	9.1868e-06
BnaA05g25210D	GDSL esterase/lipase 1-like	2.32644	0.00126636
BnaA06g16030D	proline-rich family protein	2.31812	0.00413178
BnaA09g05000D	Probable WRKY transcription factor 30	2.31244	1.47978e-07
BnaA03g28150D	ARM repeat superfamily protein	2.30977	0.000353193
BnaAnng24600D	Putative Delta(7)-sterol-C5(6)-desaturase 2	2.30304	7.95233e-07
BnaC03g52730D	Mitochondrial phosphate carrier protein 2, mitochondrial	2.30289	6.04776e-09
BnaAnng19370D	GNS1/SUR4 membrane protein family	2.30066	1.70303e-07
BnaA06g12720D	Cytosolic sulfotransferase 17	2.30042	1.29314e-10
BnaC05g30440D	#N/A	2.29969	0.000420092
BnaA03g33400D	9-cis-epoxycarotenoid dioxygenase NCED3, chloroplastic	2.29478	0.000801262
BnaA04g25790D	heat stress transcription factor B-4b-like	2.29358	0.00069166
BnaAnng30810D	Transcription factor MYB51	2.29357	0.000143988
BnaC01g04250D	UDP-glycosyltransferase 73B3	2.29196	2.5585e-05
BnaC09g09740D	alpha/beta-Hydrolases superfamily protein	2.28921	2.27975e-05
BnaCnng06970D	myb domain protein 61	2.28872	7.41226e-06
BnaC07g30300D	Probable WRKY transcription factor 30	2.2887	0.000160105
BnaA06g15780D	response to low sulfur 3	2.2798	0.000294395
BnaA03g02400D	carboxypeptidase	2.27905	0.000276704
BnaA08g28870D	loricrin-like	2.27655	1.74682e-05
BnaA09g45270D	Class I glutamine amidotransferase-like superfamily protein	2.27255	0.00592329
BnaA08g21450D	O-methyltransferase family protein	2.27182	6.27777e-06
BnaC06g10380D	GDSL esterase/lipase 3	2.27166	7.5239e-06
BnaC01g20660D	Ethylene-responsive transcription factor ERF054	2.26928	0.000112985
BnaC08g12880D	Ethylene-responsive transcription factor ERF054	2.26706	1.24559e-05
BnaC07g38110D	Cysteine-rich receptor-like protein kinase 11	2.2651	9.09459e-05
BnaC04g36020D	Methylesterase 7	2.26465	1.31952e-07
BnaA03g38680D	receptor like protein 33	2.26413	0.00383788
BnaC07g35670D	Probable xyloglucan endotransglucosylase/hydrolase protein 29	2.26143	7.72976e-09
BnaA10g23900D	Peptide methionine sulfoxide reductase A2	2.26069	0.00551559
BnaC08g19690D	O-methyltransferase family protein	2.25553	6.07633e-06
BnaC06g35790D	GNS1/SUR4 membrane protein family	2.25499	0.0001421
BnaC09g01070D	Subtilisin-like protease SBT1.7	2.25331	7.34392e-12
BnaA07g27130D	Exostosin family protein	2.25311	0.000121429
BnaA03g21150D	Probable pectinesterase/pectinesterase inhibitor 17	2.25223	0.00107908
BnaC04g03720D	ATP sulfurylase 2	2.25078	0.000176511
BnaC01g21390D	Phospholipase A1-Ibeta2, chloroplastic	2.24436	0.000801893
BnaC03g69160D	probable WRKY transcription factor 10	2.24218	0.00739317
BnaA08g22130D	Probable flavin-containing monooxygenase 1	2.24176	1.84613e-05
BnaCnng43090D	S-alkyl-thiohydroximate lyase SUR1	2.24107	7.14667e-12
BnaA02g12840D	Ribulose bisphosphate carboxylase small chain 1A, chloroplastic	2.24012	2.67148e-05
BnaA08g03010D	glutathione S-transferase T3-like	2.23612	0.00404306
BnaA08g28160D	receptor like protein 54	2.23518	0.000711318
BnaC01g05220D	Zinc transporter 9	2.23126	0.00873222
BnaA07g27300D	Protein PLANT CADMIUM RESISTANCE 11	2.23114	0.000224209
BnaA08g24260D	#N/A	2.23111	0.00165815
BnaA10g24210D	Probable L-type lectin-domain containing receptor kinase S.5	2.22916	0.000608043
BnaA04g03320D	jasmonate-regulated gene 21	2.22905	0.000240878
BnaA10g06460D	RING/U-box superfamily protein	2.22845	4.73704e-06
BnaAnng25610D	Indole-3-acetic acid-amido synthetase GH3.6	2.22812	0.000334083
BnaC07g07580D	9-cis-epoxycarotenoid dioxygenase NCED6, chloroplastic	2.22659	0.00693171
BnaC07g38550D	Probable WRKY transcription factor 53	2.22313	0.000516616
BnaC06g40990D	stigma-specific STIG1-like protein 3	2.22063	0.00174301
BnaC07g17970D	FAD-binding Berberine family protein	2.21462	0.000494075
BnaC04g03120D	UDP-glycosyltransferase 74F1	2.21112	0.000646006
BnaC01g01500D	Cytochrome P450 81F1	2.20865	0.000112985
BnaC08g41670D	Stigma-specific Stig1 family protein	2.20802	0.00778473
BnaCnng70520D	Nucleolar 27S pre-rRNA processing, Urb2/Npa2	2.20457	0.00480446
BnaC08g24260D	UDP-glycosyltransferase 73C7	2.20388	0.00716262
BnaC07g37810D	MATE efflux family protein	2.20227	0.000660589
BnaC05g01260D	Polyketide cyclase/dehydrase and lipid transport superfamily protein	2.20185	2.9186e-05
BnaA02g05790D	histone deacetylase HDT2-like	2.19364	0.00451106
BnaC02g05160D	Peroxidase 55	2.19264	0.00343125
BnaC05g11360D	Class I glutamine amidotransferase-like superfamily protein	2.18857	0.00339792
BnaA09g26990D	Putative F-box/FBD/LRR-repeat protein At1g16940	2.18829	1.00683e-05
BnaA03g43870D	Probable xyloglucan endotransglucosylase/hydrolase protein 29	2.18701	4.30671e-06
BnaC08g40770D	Leucine-rich receptor-like protein kinase family protein	2.18242	0.0114856
BnaA01g24920D	#N/A	2.1813	7.13616e-06
BnaC03g52490D	Cysteine proteinases superfamily protein	2.17993	0.00531532
BnaC07g36420D	Reticuline oxidase-like protein	2.17806	1.03939e-09
BnaC07g50590D	Ethylene-responsive transcription factor ERF054	2.17616	0.000988591
BnaC02g33910D	LOW QUALITY PROTEIN: uncharacterized protein At2g29880-like	2.17536	4.80297e-07
BnaC03g72470D	Short-chain dehydrogenase reductase 3c	2.17018	0.0117594
BnaA09g39060D	Arabidopsis thaliana protein of unknown function (DUF821)	2.17016	0.00199861
BnaC07g46040D	Cytochrome P450 84A1	2.16502	1.33865e-08
BnaC05g01080D	Mannan endo-1,4-beta-mannosidase 1	2.16282	1.19179e-05
BnaC04g43020D	myb domain protein 101	2.16139	0.00198951
BnaC06g12270D	Probable S-adenosylmethionine-dependent methyltransferase At5g38100	2.16099	5.48372e-07
BnaA07g32020D	Isoflavone reductase homolog P3	2.16002	3.64941e-06
BnaA03g11400D	Glycerophosphodiester phosphodiesterase GDPDL4	2.15815	0.00453704
BnaC03g25230D	Probable pectinesterase/pectinesterase inhibitor 17	2.1564	5.67359e-05
BnaA02g18610D	Nitrate reductase	2.15634	0.000645841
BnaA05g02380D	postsynaptic protein-related	2.15442	0.00300211
BnaA05g30040D	Cytochrome b561 and DOMON domain-containing protein At3g07570	2.15437	4.94971e-07
BnaAnng12430D	receptor like protein 54	2.15431	0.000446268
BnaC09g02400D	Glutamate receptor 1.2	2.14949	0.00595686
BnaC07g36550D	Probable beta-1,3-galactosyltransferase 20	2.14675	0.0138384
BnaCnng78090D	#N/A	2.14654	1.08208e-05
BnaC07g19090D	Probable WRKY transcription factor 8	2.14355	8.30994e-06
BnaA06g15800D	response to low sulfur 1	2.14077	2.3475e-05
BnaC06g13220D	Lysine histidine transporter 1	2.13634	1.33865e-08
BnaA03g21140D	Probable pectinesterase/pectinesterase inhibitor 17	2.12846	0.000317429
BnaC06g34910D	Transcription factor MYB122	2.12749	0.0105081
BnaA01g36830D	#N/A	2.12351	0.00889634
BnaC04g12030D	Glutamate decarboxylase 2	2.12262	0.00972305
BnaC09g19320D	Probable WRKY transcription factor 8	2.12006	7.41226e-06
BnaC01g15520D	Cation/H(+) antiporter 17	2.11294	0.000208982
BnaC05g20740D	Transcription factor MYB108	2.11139	0.000619278
BnaA02g11590D	Probable LRR receptor-like serine/threonine-protein kinase At1g74360	2.10819	0.0170467
BnaC05g11970D	Protein ROOT INITIATION DEFECTIVE 3	2.10682	0.00434669
BnaC07g08320D	myb domain protein 15	2.10346	0.00109969
BnaC08g15920D	#N/A	2.10029	0.00260082
BnaC03g25220D	Probable pectinesterase/pectinesterase inhibitor 17	2.09771	5.87047e-06
BnaC07g17210D	glu S.griseus protease inhibitor-like	2.09591	0.00590072
BnaA09g30190D	Heavy metal transport/detoxification superfamily protein	2.09232	0.00247918
BnaA08g29060D	Protein TRM32	2.0865	0.000489028
BnaC01g36670D	Cytochrome P450 72A15	2.08615	0.00418583
BnaA02g15030D	anthranilate phosphoribosyltransferase, putative	2.08502	0.0147258
BnaC03g75990D	Putative F-box/FBD/LRR-repeat protein At1g16940	2.08231	0.00502327
BnaC08g30390D	putative RING-H2 finger protein ATL36	2.08112	0.00773393
BnaA01g17800D	Lactate/malate dehydrogenase family protein	2.0808	7.80387e-07
BnaA02g18870D	VQ motif-containing protein 10-like	2.07052	3.80127e-07
BnaA10g07090D	G-type lectin S-receptor-like serine/threonine-protein kinase At1g11330	2.06355	0.00280344
BnaC06g23900D	Disease resistance protein (TIR-NBS class)	2.05917	0.00716262
BnaA05g31800D	Sugar transporter ERD6-like 12	2.05853	0.0188882
BnaC04g09800D	EID1-like F-box protein 3	2.0584	0.0131276
BnaC04g26600D	PAR1 protein	2.05752	0.00431578
BnaA03g53700D	Methylesterase 7	2.05604	0.00074424
BnaC04g35560D	Serine/threonine-protein kinase SRK2J	2.05551	8.97975e-06
BnaA07g37560D	Probable S-adenosylmethionine-dependent methyltransferase At5g38100	2.05337	3.90795e-08
BnaA01g22240D	U-box domain-containing protein 19	2.05268	0.000477166
BnaC04g02100D	postsynaptic protein-related	2.05226	0.0204466
BnaC03g49910D	splicing factor, putative	2.04901	0.000246785
BnaC04g31630D	Cytochrome c biogenesis protein CcsA	2.04522	0.000863933
BnaA03g20310D	Chitinase family protein	2.04443	0.000180975
BnaC08g21400D	cysteine-rich and transmembrane domain-containing protein a-like	2.04335	0.000422485
BnaA05g23670D	Probable lipid desaturase ADS3.2, chloroplastic	2.04263	0.000320606
BnaA09g45220D	Putative F-box/FBD/LRR-repeat protein At1g16940	2.03805	0.0168861
BnaC01g37630D	Endoglucanase 7	2.03751	0.00401525
BnaC09g44020D	Probable WRKY transcription factor 75	2.03698	1.10631e-08
BnaA01g20280D	Cytochrome P450 71A23	2.03629	0.0231143
BnaC04g28590D	Protein DJ-1 homolog A	2.03225	5.25829e-10
BnaA09g35360D	Glycosyl hydrolase superfamily protein	2.02882	0.018576
BnaA08g13860D	Ethylene-responsive transcription factor ERF054	2.02659	0.00010136
BnaA05g15140D	cryptdin-related protein [Arabidopsis thaliana]	2.0245	0.000365168
BnaCnng63370D	GDSL esterase/lipase 3	2.02106	0.0003103
BnaA01g00110D	Rhamnogalacturonate lyase family protein	2.02043	0.0261074
BnaA08g18550D	ribonuclease h protein at1g65750	2.01584	0.00013208
BnaA02g29990D	Nitrile-specifier protein 5	2.01291	0.0014318
BnaC05g14690D	cdp-diacylglycerol--glycerol-3-phosphate 3- partial	2.01265	3.29243e-06
BnaC02g08080D	Curculin-like (mannose-binding) lectin family protein	2.01152	1.52861e-05
BnaA03g42770D	Matrixin family protein	2.00911	6.60184e-05
BnaC09g25420D	Peroxidase 37	2.00667	0.000646006
BnaA03g19180D	WRKY transcription factor 55	2.00184	0.00284385
BnaC01g01620D	#N/A	2.00136	0.0164759
BnaA04g25220D	Chitinase family protein	2.00115	4.18757e-06
BnaC07g33070D	UDP-glycosyltransferase 75D1	2.0003	5.70805e-20
BnaCnng32090D	9-cis-epoxycarotenoid dioxygenase NCED3, chloroplastic	1.99958	0.0003103
BnaC05g38370D	probable membrane-associated kinase regulator 1	1.99801	0.02722
BnaA04g18580D	#N/A	1.99746	0.00169471
BnaC09g30400D	Cytochrome P450 71B11	1.99642	0.0288885
BnaC08g17160D	cytochrome p450 72c1	1.99264	0.0293043
BnaC06g31030D	Glutathione S-transferase U12	1.98968	1.39223e-13
BnaC03g15480D	cytochrome P450, family 715, subfamily A, polypeptide 1	1.98594	0.0288885
BnaCnng20300D	nucleic acid binding;zinc ion binding	1.98377	0.0251256
BnaC02g02350D	Peroxidase 52	1.9827	1.84349e-05
BnaA01g00580D	Auxin-responsive GH3 family protein	1.98254	0.00380975
BnaA04g26280D	Cytochrome P450 76C2	1.9824	5.67359e-05
BnaCnng77080D	Probable flavin-containing monooxygenase 1	1.98198	0.000748085
BnaA01g22750D	Putative G-type lectin S-receptor-like serine/threonine-protein kinase At1g61610	1.98157	0.00613202
BnaA03g05290D	tyrosyl-DNA phosphodiesterase-related	1.98087	0.00971014
BnaA09g00420D	UDP-D-xylose\x3aL-fucose alpha-1,3-D-xylosyltransferase 1	1.98056	2.60401e-05
BnaA05g31520D	ATP-dependent DNA helicase Q-like 1	1.97963	0.0264371
BnaC07g37400D	SAUR-like auxin-responsive protein family	1.97813	0.000477061
BnaAnng12390D	receptor like protein 54	1.97773	0.000914973
BnaA01g34620D	Adenylyl-sulfate kinase 2, chloroplastic	1.97687	9.10156e-07
BnaCnng45550D	MATE efflux family protein	1.97562	0.0111223
BnaA04g12560D	putative F-box protein At5g44220	1.97525	0.0333466
BnaCnng18530D	ARM repeat superfamily protein	1.97369	8.70162e-15
BnaC05g32780D	BTB/POZ domain-containing protein At5g60050	1.97335	0.0117697
BnaA08g30630D	elongation factor 1-delta	1.97174	0.0288885
BnaA03g45460D	SAUR-like auxin-responsive protein family	1.96954	9.05688e-06
BnaA02g11580D	Probable LRR receptor-like serine/threonine-protein kinase At1g74360	1.96575	0.00657984
BnaC07g10320D	Glutaredoxin-C9	1.96262	0.00289956
BnaC02g22590D	Protein STRICTOSIDINE SYNTHASE-LIKE 12	1.95882	2.91618e-15
BnaA03g58300D	Ras-related protein RABA1e	1.95582	0.000463731
BnaC06g16950D	Putative F-box/LRR-repeat protein At5g38386	1.95533	3.27747e-05
BnaA07g13180D	pseudogene of cysteine protease-related	1.95336	7.13616e-06
BnaC02g14990D	stress response protein nst1-like	1.95304	0.000285587
BnaA01g12970D	cysteine-rich RLK (RECEPTOR-like protein kinase) 16	1.95206	0.00589645
BnaA07g19530D	Gibberellin receptor GID1B	1.95075	0.0118825
BnaA10g20720D	receptor like protein 19	1.94916	0.00731341
BnaA01g12580D	Protein STAY-GREEN 1, chloroplastic	1.94585	0.0366435
BnaA10g07080D	G-type lectin S-receptor-like serine/threonine-protein kinase At1g11330	1.94323	0.0281382
BnaC02g41390D	Squalene epoxidase 5	1.94254	0.00164589
BnaC01g38180D	NAC (No Apical Meristem) domain transcriptional regulator superfamily protein	1.94122	0.00019073
BnaA04g17560D	Trans-cinnamate 4-monooxygenase	1.94113	0.000183756
BnaC01g15870D	Trehalase	1.93917	0.00061216
BnaC01g44930D	plant U-box 24	1.93768	0.0375061
BnaC01g41460D	thaumatin-like protein 1	1.93685	1.1472e-06
BnaA02g16690D	Transcription factor MYB51	1.93519	0.00521765
BnaC03g31190D	plastocyanin-like domain-containing protein	1.93334	0.0333811
BnaAnng03970D	cysteine-rich and transmembrane domain-containing protein a-like	1.93046	0.0395667
BnaC09g04560D	Probable WRKY transcription factor 30	1.93006	1.00083e-05
BnaAnng37880D	Proline dehydrogenase 2, mitochondrial	1.92786	0.0039301
BnaA10g05120D	Type I inositol 1,4,5-trisphosphate 5-phosphatase 11	1.92668	0.000595615
BnaC03g22830D	WRKY transcription factor 55	1.92204	0.000741006
BnaC06g15520D	Patatin-like protein 7	1.91794	0.000973017
BnaCnng21280D	receptor-like protein kinase 1	1.91785	0.00381947
BnaAnng31420D	Cytochrome P450 89A9	1.91258	0.00240048
BnaAnng35400D	UDP-glycosyltransferase 73C4	1.9121	0.013572
BnaC08g18680D	Probable flavin-containing monooxygenase 1	1.91023	0.00127708
BnaA01g13540D	UDP-glucose 4-epimerase 2	1.90858	0.00204531
BnaAnng42000D	Alkaline-phosphatase-like family protein	1.90656	0.0103589
BnaC07g10840D	myb domain protein 116	1.90594	0.00218917
BnaA09g46230D	#N/A	1.90577	0.01147
BnaA05g35970D	Ubiquinol oxidase 3, mitochondrial	1.90562	3.50973e-06
BnaA05g24360D	probable membrane-associated kinase regulator 1	1.90414	0.034431
BnaA06g19110D	Mitochondrial phosphate carrier protein 2, mitochondrial	1.90239	8.18342e-09
BnaCnng35440D	Glutathione S-transferase U10	1.90153	7.06282e-06
BnaA07g11060D	O-methyltransferase family protein	1.90145	0.00034719
BnaC01g00790D	Adenylyl-sulfate kinase 2, chloroplastic	1.89911	1.88587e-07
BnaA02g05170D	Indole-3-acetaldehyde oxidase	1.89903	0.0132227
BnaA06g17370D	#N/A	1.89709	0.0187912
BnaC03g30870D	Glutathione S-transferase F2	1.89693	1.06193e-06
BnaC01g04160D	Cinnamyl alcohol dehydrogenase 5	1.8916	0.0113147
BnaC07g14740D	40S ribosomal protein S4-3	1.8885	0.0409169
BnaAnng05020D	G-box-binding factor 1-like	1.88249	0.0332666
BnaC05g00190D	#N/A	1.88099	0.0361509
BnaAnng39070D	Protein PLANT CADMIUM RESISTANCE 2	1.8797	0.00113468
BnaCnng03910D	alpha 1,4-glycosyltransferase family protein	1.8792	0.000847242
BnaCnng01970D	E3 ubiquitin-protein ligase RNF19B-like	1.8779	0.0489334
BnaAnng29660D	Ethylene-responsive transcription factor ERF053	1.87726	0.0148727
BnaA03g58610D	cytochrome P450, family 706, subfamily A, polypeptide 1	1.87724	0.00148625
BnaC03g30880D	Glutathione S-transferase F3	1.87568	1.47815e-06
BnaCnng01270D	UDP-D-xylose\x3aL-fucose alpha-1,3-D-xylosyltransferase 1	1.87386	4.03042e-08
BnaC09g47680D	carboxypeptidase	1.87117	0.000941132
BnaC08g12620D	#N/A	1.86904	0.0141364
BnaC07g15850D	#N/A	1.86838	0.017945
BnaA02g09030D	putative lipid-transfer protein DIR1 [Brassica napus]	1.86836	0.00219194
BnaA09g05190D	Bidirectional sugar transporter SWEET12	1.86525	0.00361992
BnaA08g27760D	L-type lectin-domain containing receptor kinase IV.4	1.86472	0.0453915
BnaC01g01570D	Auxin-responsive GH3 family protein	1.86444	0.00124091
BnaC01g43110D	U-box domain-containing protein 19	1.86427	0.00308382
BnaC01g09990D	#N/A	1.86265	0.0176307
BnaA04g04430D	#N/A	1.86073	0.0330718
BnaC04g46630D	Delta-1-pyrroline-5-carboxylate synthase A	1.85965	0.00473416
BnaC07g36430D	Reticuline oxidase-like protein	1.85901	8.51595e-09
BnaA07g16030D	Cell division control protein 48 homolog D	1.85698	0.0332655
BnaA03g53590D	Nucleic acid-binding, OB-fold-like protein	1.85693	0.0224075
BnaC03g55310D	Concanavalin A-like lectin protein kinase family protein	1.8569	0.045378
BnaA01g33320D	Starch synthase 2, chloroplastic/amyloplastic	1.85622	0.0138852
BnaC06g02740D	Cytochrome P450 72A11	1.85612	2.90484e-06
BnaC01g14830D	cysteine-rich RLK (RECEPTOR-like protein kinase) 16	1.85595	0.0432376
BnaCnng14620D	Putative cysteine-rich receptor-like protein kinase 23	1.85292	2.59065e-05
BnaC01g26210D	#N/A	1.85277	0.000189391
BnaCnng78130D	Cytokinin dehydrogenase 2	1.85122	0.0449974
BnaCnng39570D	fucosyltransferase 6	1.85097	0.0109194
BnaA07g03950D	receptor like protein 19	1.85084	0.0481668
BnaC08g01200D	receptor like protein 54	1.85024	0.0105549
BnaA05g23730D	#N/A	1.84928	6.67457e-05
BnaC05g04960D	Probable protein phosphatase 2C 2	1.84544	0.0206467
BnaUnng01910D	RING/U-box superfamily protein	1.8452	0.0412431
BnaA01g13440D	Probable WRKY transcription factor 53	1.84218	0.0077181
BnaA04g26130D	Leucine-rich repeat protein kinase family protein	1.83925	0.000174208
BnaC04g28600D	E3 ubiquitin-protein ligase KEG	1.8391	0.0476703
BnaCnng64540D	Putative F-box/FBD/LRR-repeat protein At1g16940	1.83886	4.65496e-05
BnaC03g30950D	L-type lectin-domain containing receptor kinase IV.4	1.83845	0.0180262
BnaC01g14790D	Cysteine-rich receptor-like protein kinase 21	1.83777	0.0127299
BnaA02g30600D	Protein GAMETE EXPRESSED 2	1.83761	7.90486e-05
BnaA01g13360D	Cation/H(+) antiporter 17	1.8371	0.00329977
BnaA01g10320D	Nucleotide-diphospho-sugar transferase, predicted	1.8351	0.000107725
BnaC08g42690D	myb domain protein 61	1.83434	0.0409496
BnaC04g43070D	receptor like protein 39	1.83144	0.00477906
BnaA07g07350D	alpha/beta-Hydrolases superfamily protein	1.83085	0.000826716
BnaCnng41890D	Indole-3-acetic acid-amido synthetase GH3.17	1.82848	0.0355943
BnaA03g44600D	Reticuline oxidase-like protein	1.82734	0.000674942
BnaA03g38670D	Adenylyl-sulfate kinase 1, chloroplastic	1.82669	1.03939e-09
BnaA10g23120D	carboxypeptidase	1.8236	0.000471311
BnaA03g34700D	Probable cyclic nucleotide-gated ion channel 20, chloroplastic	1.82187	0.0169161
BnaA04g05980D	Protein DJ-1 homolog A	1.82031	2.53951e-05
BnaAnng19250D	Homeobox-leucine zipper protein HAT22	1.81613	0.000120522
BnaC08g30370D	Beta-glucosidase 16	1.81109	0.00185599
BnaC03g67380D	WRKY transcription factor 18	1.80898	0.00019073
BnaC03g21960D	Major facilitator superfamily protein	1.80847	0.000599381
BnaA07g00460D	S-alkyl-thiohydroximate lyase SUR1	1.8082	1.10105e-06
BnaC04g45010D	Protein YLS9	1.80804	8.43701e-08
BnaA03g11690D	Glucose-6-phosphate/phosphate translocator 1, chloroplastic	1.80269	3.18827e-05
BnaC02g40040D	Calmodulin-binding protein 60 G	1.802	3.53755e-07
BnaC03g02620D	Probable carboxylesterase 15	1.80031	0.0432376
BnaAnng14710D	extensin-like [Brassica oleracea var. oleracea]	1.79732	0.000423492
BnaC05g45330D	Transcription factor MYB108	1.79533	0.0254193
BnaA01g34380D	ARM repeat superfamily protein	1.79434	4.23264e-09
BnaA03g49050D	Ethylene-responsive transcription factor ERF054	1.79405	0.0112958
BnaA07g08330D	Glutaredoxin-C9	1.78757	0.00487408
BnaA03g41970D	Protein farnesyltransferase/geranylgeranyltransferase type-1 subunit alpha	1.78748	2.59488e-27
BnaA06g27970D	Protein kinase family protein with leucine-rich repeat domain	1.78724	0.00240955
BnaA10g12140D	Probable protein phosphatase 2C 78	1.78708	0.024979
BnaAnng39370D	F-box protein PP2-B15	1.78665	0.00264038
BnaC02g39700D	E3 ubiquitin-protein ligase ATL31	1.7855	6.58248e-05
BnaCnng57900D	Glutamine synthetase cytosolic isozyme 1-3	1.78528	0.00128948
BnaC03g19840D	Protein YLS9	1.78262	0.000294648
BnaA01g12980D	Cysteine-rich receptor-like protein kinase 21	1.78114	0.015098
BnaA07g31220D	Transcription factor MYB122	1.78046	0.041985
BnaC06g05390D	26.5 kDa heat shock protein, mitochondrial	1.77856	0.0288885
BnaA10g23540D	CBL-interacting serine/threonine-protein kinase 10	1.77838	0.0344121
BnaA01g30220D	NAC (No Apical Meristem) domain transcriptional regulator superfamily protein	1.77674	0.00967232
BnaA01g34610D	Tryptophan N-monooxygenase 1	1.76662	9.66215e-06
BnaA09g05740D	Gamma-aminobutyrate transaminase POP2, mitochondrial	1.76617	1.06134e-05
BnaA07g33180D	extensin-like [Brassica napus]	1.7622	3.94007e-05
BnaC08g34480D	#N/A	1.76217	0.0334597
BnaA09g28890D	FAD-binding Berberine family protein	1.75456	0.0270398
BnaA05g19550D	Ras-related small GTP-binding family protein	1.75454	3.14567e-05
BnaC03g47500D	LysM domain-containing GPI-anchored protein 2	1.74917	2.56218e-06
BnaC04g56610D	Peroxidase 22	1.74907	0.0085441
BnaA01g29390D	9-cis-epoxycarotenoid dioxygenase NCED3, chloroplastic	1.74902	6.33449e-05
BnaA07g30030D	#N/A	1.74782	3.53982e-05
BnaA09g52790D	Myrosinase 1	1.7473	0.0371326
BnaA03g43160D	Calcineurin B-like protein 1	1.74652	0.000843646
BnaCnng53280D	UDP-glycosyltransferase 91C1	1.74587	0.000258086
BnaA09g45890D	Phosphate transporter PHO1 homolog 3	1.74581	0.00741974
BnaC07g35130D	Probable WRKY transcription factor 28	1.74337	1.02016e-08
BnaC04g52880D	Transcription factor JUNGBRUNNEN 1	1.73991	0.00079188
BnaCnng39650D	Chitinase family protein	1.73643	0.00295656
BnaC02g11750D	cytochrome P450, family 81, subfamily F, polypeptide 2	1.73498	0.00106237
BnaA07g03730D	S-adenosyl-L-methionine-dependent methyltransferases superfamily protein	1.73193	0.00061216
BnaA03g26130D	Glutathione S-transferase F3	1.73028	4.33872e-07
BnaC07g23400D	Cytochrome P450 71B20	1.72911	0.00361992
BnaC03g68480D	receptor like protein 37	1.72422	0.000135814
BnaA07g21910D	thaumatin-like protein 3	1.72262	0.000316854
BnaC03g24280D	Chitinase family protein	1.7175	0.0117637
BnaA09g41170D	Probable aminotransferase TAT3	1.71352	0.0359901
BnaA03g04290D	Ethylene-responsive transcription factor ERF113	1.71207	3.27747e-05
BnaA03g46280D	Probable WRKY transcription factor 53	1.71178	0.0127648
BnaC08g30360D	Beta-glucosidase 27	1.71127	0.000956664
BnaCnng60000D	Ubiquinol oxidase 3, mitochondrial	1.71043	0.00169767
BnaA01g23940D	Ethylene-responsive transcription factor 1B	1.70952	0.00817119
BnaAnng24050D	cysteine-rich RLK (RECEPTOR-like protein kinase) 20	1.70883	0.0423062
BnaA05g36370D	VQ motif-containing protein 22	1.70877	0.0220226
BnaC03g15510D	Low-temperature-induced 65 kDa protein	1.70743	0.0144218
BnaA10g01170D	Polyketide cyclase/dehydrase and lipid transport superfamily protein	1.70632	0.00258818
BnaA07g32010D	oxidoreductases, acting on NADH or NADPH	1.70493	0.0224759
BnaC06g29150D	Putative caffeoyl-CoA O-methyltransferase At1g67980	1.70434	0.00515085
BnaA03g55400D	Probable carboxylesterase 15	1.70131	0.0306555
BnaA10g30040D	UDP-glycosyltransferase 92A1	1.69804	1.03389e-07
BnaC03g40070D	Probable cyclic nucleotide-gated ion channel 20, chloroplastic	1.69715	0.00349171
BnaA04g22000D	Peroxidase 22	1.69501	0.0373841
BnaA03g26140D	Glutathione S-transferase F3	1.69446	3.02724e-09
BnaA09g36600D	Glucan endo-1,3-beta-glucosidase, acidic isoform	1.69398	0.0291435
BnaA06g14380D	Prolyl oligopeptidase family protein	1.68906	0.00126163
BnaC07g26470D	Glutamate receptor 1.2	1.68637	0.0238023
BnaC08g09270D	RING-H2 finger protein ATL56	1.68607	0.000433801
BnaC01g36910D	9-cis-epoxycarotenoid dioxygenase NCED3, chloroplastic	1.6815	2.4634e-05
BnaC03g26850D	Probable aminotransferase TAT3	1.6814	0.0261074
BnaC05g01470D	Beta-glucosidase 11	1.68085	0.00294189
BnaA09g47340D	Flavin-containing monooxygenase FMO GS-OX-like 2	1.67984	0.00405557
BnaC03g11320D	tRNA(His) guanylyltransferase 1	1.67806	0.0195388
BnaA09g55500D	Beta-glucosidase 16	1.67783	2.92211e-06
BnaA02g23720D	Regulatory protein NPR3	1.67749	0.00376412
BnaAnng06130D	Alpha-galactosidase 1	1.67734	0.00070034
BnaA03g39390D	Arabidopsis phospholipase-like protein (PEARLI 4) family	1.67465	0.00562587
BnaAnng28300D	Lysine histidine transporter 1	1.67289	2.39953e-05
BnaC06g04480D	UDP-Glycosyltransferase superfamily protein	1.67176	0.00719184
BnaC07g38100D	Cysteine-rich receptor-like protein kinase 21	1.66944	0.0223004
BnaC08g13910D	Leucine-rich receptor-like protein kinase family protein	1.66901	0.00538821
BnaC03g33180D	ARM repeat superfamily protein	1.66846	0.0321019
BnaC05g03070D	Probable plastidic glucose transporter 1	1.66454	0.00337492
BnaA01g35070D	Trehalase	1.66366	0.00201679
BnaA02g31140D	E3 ubiquitin-protein ligase ATL31	1.66289	0.000192773
BnaC03g60820D	Tryptophan N-monooxygenase 1	1.66061	7.68803e-05
BnaC03g21640D	#N/A	1.65957	0.00600157
BnaA04g16980D	mutator-like transposase	1.65925	0.0391743
BnaC07g37460D	cytochrome P450, family 706, subfamily A, polypeptide 1	1.65832	0.0140811
BnaC08g00970D	Protein SULFUR DEFICIENCY-INDUCED 2	1.65813	0.00245706
BnaA08g28590D	L-type lectin-domain containing receptor kinase IV.4	1.65749	0.0209306
BnaA09g07440D	Subtilisin-like protease SBT1.7	1.65692	0.00328056
BnaA09g02800D	Protein kinase family protein	1.65503	4.65496e-05
BnaA09g44500D	Transcription factor MYB51	1.65134	0.00215388
BnaA03g33390D	9-cis-epoxycarotenoid dioxygenase NCED3, chloroplastic	1.65133	0.00543185
BnaC01g11820D	UDP-Glycosyltransferase superfamily protein	1.65122	0.00562587
BnaC01g15640D	Probable WRKY transcription factor 53	1.64884	0.0120407
BnaC06g40170D	Probable WRKY transcription factor 40	1.64835	0.00291677
BnaC03g58330D	ribonuclease h protein at1g65750	1.64791	0.0208644
BnaA02g14860D	nonsense-mediated mrna decay protein 2-like	1.64649	0.000502098
BnaA01g08010D	E3 ubiquitin-protein ligase ATL42	1.64598	0.0148025
BnaC04g06800D	Probable WRKY transcription factor 33	1.64533	0.000645841
BnaA08g16100D	Tryptophan N-monooxygenase 1	1.64516	0.00113554
BnaA04g13530D	#N/A	1.64458	0.0148666
BnaA06g13200D	cdp-diacylglycerol--glycerol-3-phosphate 3- partial	1.64259	0.00590105
BnaA02g35160D	Curculin-like (mannose-binding) lectin family protein	1.64251	0.000612309
BnaCnng51060D	Peroxidase 71	1.64104	0.00346243
BnaC08g17520D	D-3-phosphoglycerate dehydrogenase 2, chloroplastic	1.64064	2.72777e-07
BnaC01g00800D	Tryptophan N-monooxygenase 1	1.63912	1.9238e-05
BnaC04g39030D	Protein STRICTOSIDINE SYNTHASE-LIKE 9	1.63647	1.39896e-10
BnaC08g50010D	Galactinol synthase 3	1.63644	0.00123301
BnaA06g03860D	#N/A	1.63617	0.00556049
BnaAnng28220D	Calmodulin-binding protein 60 G	1.63376	3.26745e-05
BnaC04g37740D	receptor like protein 21	1.63348	0.0210923
BnaC05g18530D	Dynein light chain type 1 family protein	1.63293	0.000230547
BnaC05g47780D	ARM repeat superfamily protein	1.63186	1.1927e-11
BnaA07g35600D	Pyrophosphate-energized vacuolar membrane proton pump 1	1.62965	0.0288885
BnaC05g50000D	Inorganic pyrophosphatase 2	1.6277	9.18047e-06
BnaA09g20010D	cfe protein	1.62643	0.000602767
BnaA03g09460D	1-aminocyclopropane-1-carboxylate oxidase homolog 11	1.62479	6.1894e-05
BnaA03g38440D	Aminotransferase ALD1	1.62371	0.029794
BnaC06g02750D	Probable carboxylesterase 5	1.62336	0.000897661
BnaA01g19470D	Protein STRICTOSIDINE SYNTHASE-LIKE 6	1.62317	0.0223004
BnaC04g41120D	Trans-cinnamate 4-monooxygenase	1.62286	0.00169337
BnaC05g03130D	mitogen-activated protein kinase kinase kinase 18	1.61899	0.0171431
BnaA03g04310D	Aldolase-type TIM barrel family protein	1.6185	3.27747e-05
BnaA08g09010D	receptor like protein 37	1.61536	0.0286066
BnaA06g22540D	Octicosapeptide/Phox/Bem1p family protein	1.61518	0.0169025
BnaA04g27940D	L-type lectin-domain containing receptor kinase IV.3	1.61206	3.94007e-05
BnaC06g40530D	Pyrophosphate-energized vacuolar membrane proton pump 1	1.61192	0.0306704
BnaC05g04990D	Internal alternative NAD(P)H-ubiquinone oxidoreductase A1, mitochondrial	1.61191	0.000803957
BnaA01g13810D	DUF679 domain membrane protein 1	1.61113	0.00253989
BnaA06g35280D	Adenine nucleotide alpha hydrolases-like superfamily protein	1.60964	0.000138849
BnaA09g30020D	Dynein light chain type 1 family protein	1.60738	3.60125e-05
BnaA02g26140D	Glutamate decarboxylase 4	1.60575	8.61282e-06
BnaC09g12480D	Late embryogenesis abundant (LEA) hydroxyproline-rich glycoprotein family	1.60267	0.00541751
BnaC07g44840D	D-3-phosphoglycerate dehydrogenase 1, chloroplastic	1.60219	0.0196198
BnaAnng41590D	FAD-binding Berberine family protein	1.60179	0.00908896
BnaA03g16620D	ZPR4	1.59941	0.00127591
BnaA02g12540D	S-adenosyl-L-methionine-dependent methyltransferases superfamily protein	1.59879	0.00167658
BnaA05g30870D	Transcription factor MYB108	1.59659	0.0383855
BnaC01g37500D	PRA1 family protein F3-like	1.5964	0.0066211
BnaC05g19230D	metalloendoproteinase 1	1.59505	0.00590105
BnaA03g57570D	Adenosylhomocysteinase 2	1.59451	0.00039831
BnaC02g19870D	Phenolic glucoside malonyltransferase 2	1.59416	1.26356e-08
BnaC02g01150D	Alpha-galactosidase 1	1.59268	0.0152781
BnaCnng28320D	#N/A	1.5895	8.75826e-05
BnaA01g25510D	cyclin-dependent protein kinase inhibitor smr3-like	1.58555	0.00806912
BnaA03g50450D	putative F-box/LRR-repeat protein 19	1.58551	0.0383855
BnaA04g28590D	Glutathione S-transferase U3	1.58321	0.019227
BnaA05g34850D	Probable WRKY transcription factor 33	1.58321	0.00121483
BnaAnng20840D	L-type lectin-domain containing receptor kinase IX.2	1.58258	0.00175984
BnaA03g20290D	chitinase, putative	1.58043	0.0291435
BnaA04g13420D	Serine/threonine-protein kinase SRK2J	1.57796	0.0273492
BnaA02g27290D	Cytosolic sulfotransferase 12	1.57483	0.000826716
BnaC07g36460D	ethylene-responsive nuclear protein -related	1.57386	0.0151055
BnaA06g15030D	Wall-associated receptor kinase 4	1.57339	0.00510294
BnaC07g38080D	kinases\x3bprotein kinases	1.5733	0.000229068
BnaA09g44200D	Putative wall-associated receptor kinase-like 11	1.56899	0.0273242
BnaA08g26700D	Sugar transporter ERD6	1.56506	0.0220019
BnaCnng14680D	NAD(P)-binding Rossmann-fold superfamily protein	1.56504	6.48365e-05
BnaC02g02590D	Duplicated homeodomain-like superfamily protein	1.56457	1.83233e-06
BnaC07g20470D	Adenine nucleotide alpha hydrolases-like superfamily protein	1.5635	0.00113281
BnaA05g20190D	Polycomb group protein FERTILIZATION-INDEPENDENT ENDOSPERM	1.56259	0.0403676
BnaA07g16580D	Patatin-like protein 7	1.56239	1.50298e-05
BnaA03g19960D	AT-hook motif nuclear-localized protein 16	1.5621	0.0366843
BnaA07g35260D	Probable WRKY transcription factor 40	1.56067	0.000105702
BnaA01g24930D	septum-promoting GTP-binding protein 1-like	1.55935	2.72746e-05
BnaA04g25750D	Beta-glucosidase 27	1.55795	0.00897015
BnaA05g25030D	9-cis-epoxycarotenoid dioxygenase NCED3, chloroplastic	1.55608	0.0264371
BnaC09g23220D	pEARLI1-like lipid transfer protein 3	1.5535	0.016439
BnaC02g22630D	Transcription factor MYB122	1.55291	0.0104878
BnaCnng63180D	ethylene-responsive transcription factor 11-like	1.55249	0.0291354
BnaA03g43770D	BES1/BZR1 homolog protein 3	1.55242	0.00122987
BnaC04g31250D	Phenolic glucoside malonyltransferase 1	1.55192	0.000238419
BnaA06g13250D	Protein TIFY 10A	1.55101	0.0412431
BnaC02g08680D	#N/A	1.55051	0.0486887
BnaA01g25980D	#N/A	1.54889	0.0145776
BnaCnng19020D	U-box domain-containing protein 20	1.54747	0.0480194
BnaC07g46480D	cytochrome P450, family 81, subfamily D, polypeptide 8	1.54617	0.000104178
BnaCnng41630D	S-adenosyl-L-methionine-dependent methyltransferases superfamily protein	1.54505	0.000594213
BnaA01g20340D	Protein EDS1	1.53989	0.0226867
BnaC04g36040D	Methylesterase 8	1.53866	0.0423062
BnaC07g11700D	Zinc finger protein ZAT10	1.5379	0.0375061
BnaC06g30840D	Protein kinase superfamily protein	1.53733	0.00806024
BnaC06g35090D	receptor like protein 15	1.53605	0.0218834
BnaA04g26640D	transmembrane protein-related	1.53553	0.00950364
BnaC03g76360D	Alanine--glyoxylate aminotransferase 2 homolog 1, mitochondrial	1.53415	0.00377379
BnaA03g24340D	Sodium transporter HKT1	1.53377	0.000128209
BnaA09g02630D	Ninja-family protein AFP3	1.5323	0.0188772
BnaCnng02630D	putative phytosulfokines 6 isoform X1	1.5317	0.01155
BnaC04g56910D	Leucine-rich repeat protein kinase family protein	1.53074	0.00019073
BnaA03g43640D	Probable WRKY transcription factor 28	1.53067	0.0450089
BnaCnng06000D	ARM repeat superfamily protein	1.52679	0.00473659
BnaA06g29770D	flowering-promoting factor 1-like protein 1	1.52662	0.0372638
BnaA02g27550D	Phospholipid-transporting ATPase 10	1.52492	0.0191171
BnaC03g31050D	Probable cyclic nucleotide-gated ion channel 12	1.52397	0.0177459
BnaA02g19730D	VQ motif-containing protein 11	1.52378	0.00558403
BnaA02g34210D	Octicosapeptide/Phox/Bem1p family protein	1.51891	0.0271414
BnaC02g11720D	Ankyrin repeat family protein	1.51835	0.000239967
BnaC03g40250D	Glutamine synthetase cytosolic isozyme 1-3	1.51812	4.03042e-08
BnaC01g01910D	Methylesterase 9	1.51587	0.000502098
BnaA03g05860D	Core-2/I-branching beta-1,6-N-acetylglucosaminyltransferase family protein	1.51526	0.00291929
BnaC07g33180D	monooxygenase 1	1.51084	0.000309747
BnaC03g76060D	E3 ubiquitin-protein ligase RHF1A	1.51037	0.00105119
BnaC04g20510D	E3 ubiquitin-protein ligase RHA1B-like	1.51005	0.0050941
BnaC03g23960D	AT-hook motif nuclear-localized protein 16	1.50898	0.00217376
BnaA05g32620D	ARM repeat superfamily protein	1.5066	4.37883e-06
BnaC09g43860D	Protein TIFY 9	1.50313	0.00389753
BnaC02g35150D	Cytosolic sulfotransferase 12	1.503	3.83568e-05
BnaCnng59310D	FAD-binding Berberine family protein	1.50295	0.00542976
BnaA08g03000D	nuclease harbi1	1.49832	0.0438608
BnaC05g16380D	O-methyltransferase family protein	1.49816	0.0026052
BnaA01g11840D	5&apos;-adenylylsulfate reductase 3, chloroplastic	1.49578	0.000276704
BnaC07g36050D	E3 ubiquitin-protein ligase BOI	1.49371	0.00822042
BnaA03g13660D	mitogen-activated protein kinase kinase kinase 14	1.49368	0.000371952
BnaCnng69070D	Probable aminotransferase ACS12	1.49348	0.00926387
BnaC06g06260D	receptor protein kinase-related	1.49241	0.00536493
BnaC01g21880D	Glycosyl hydrolase superfamily protein	1.48877	0.00282297
BnaC07g38010D	Cysteine-rich receptor-like protein kinase 10	1.48757	0.0108855
BnaC07g35300D	Ras-related protein RABA1e	1.48706	5.10045e-05
BnaC06g11170D	Serine acetyltransferase 1, chloroplastic	1.4865	0.0219899
BnaCnng60140D	cytochrome P450 71A1-like	1.48531	0.0188772
BnaA10g00470D	1-aminocyclopropane-1-carboxylate synthase 2	1.48515	0.0219082
BnaC09g13610D	Polynucleotidyl transferase, ribonuclease H-like superfamily protein	1.48375	0.00745606
BnaC03g10290D	Sucrose synthase 1	1.48257	0.00201679
BnaC07g28420D	Calmodulin-binding protein 60 G	1.48013	0.00176611
BnaA03g18480D	Major facilitator superfamily protein	1.4795	1.57886e-06
BnaA02g27280D	Cytosolic sulfotransferase 12	1.47923	0.0156349
BnaA08g31640D	MATE efflux family protein	1.47922	0.0157826
BnaC05g18390D	Heavy metal transport/detoxification superfamily protein	1.47858	0.0441924
BnaA04g28420D	protein 40-3	1.47765	0.00557615
BnaC09g49740D	Anthranilate synthase alpha subunit 1, chloroplastic	1.47616	0.0137594
BnaA10g20060D	Protein TIFY 9	1.47477	0.00273967
BnaAnng34370D	Probable aldo-keto reductase 6	1.46946	0.00531532
BnaC04g49730D	heat stress transcription factor B-4b-like	1.46854	0.0405111
BnaC07g46050D	Cytochrome P450 84A1	1.46696	7.16789e-07
BnaAnng28770D	receptor like protein 24	1.46639	0.0150797
BnaA06g17790D	Copper transporter 2	1.46446	0.00905235
BnaA04g21740D	SOUL heme-binding family protein	1.46243	0.000215489
BnaC07g39340D	Superoxide dismutase	1.46232	2.09304e-05
BnaC04g19430D	WRKY transcription factor 6	1.46056	0.0267978
BnaC03g49860D	classical arabinogalactan protein 1-like	1.45573	0.0276411
BnaA08g17180D	E3 ubiquitin-protein ligase RHF1A	1.45514	0.0199607
BnaC04g52810D	E3 ubiquitin-protein ligase ATL41	1.45491	0.00141199
BnaA02g33910D	NAC domain-containing protein 102	1.4537	0.0112687
BnaA06g08850D	Carbohydrate-binding X8 domain superfamily protein	1.45201	0.0126163
BnaA09g35370D	putative uncharacterized protein DDB_G0286915	1.45146	0.0115677
BnaA01g27860D	Putative cyclic nucleotide-gated ion channel 19	1.44532	0.00407709
BnaCnng11120D	DJ-1 protein homolog E	1.44273	5.26054e-05
BnaC08g12000D	2-oxoglutarate (2OG) and Fe(II)-dependent oxygenase superfamily protein	1.44264	0.0288885
BnaAnng22400D	Putative membrane lipoprotein	1.44205	0.0281382
BnaCnng28690D	Subtilisin-like protease SBT1.7	1.44112	0.0132227
BnaA02g35770D	Glutathione S-transferase U11	1.44028	0.0496705
BnaC01g07430D	Transcription factor bHLH69	1.43876	0.00578673
BnaA07g33720D	Beta-1,3-galactosyltransferase 7	1.43769	6.96208e-07
BnaA10g24610D	cytochrome P450 71A1-like	1.43738	0.025874
BnaC04g24330D	Glucan endo-1,3-beta-glucosidase, acidic isoform	1.4373	0.0405199
BnaC06g40830D	SsrA-binding [Gossypium arboreum]	1.43588	0.0244147
BnaC07g44780D	Cyclase family protein	1.43562	0.000150825
BnaA09g33460D	glutamate-ammonia ligases\x3bcatalytics\x3bglutamate-ammonia ligases	1.43351	0.00880344
BnaC09g52480D	Cytosolic sulfotransferase 12	1.4327	0.0224355
BnaA03g53940D	cytochrome P450, family 81, subfamily D, polypeptide 8	1.43098	0.000617176
BnaC02g34260D	Glutamate decarboxylase 4	1.43066	0.0176071
BnaA09g29750D	metalloendoproteinase 1	1.43052	0.0219082
BnaC03g44240D	rho GTPase-activating protein gacV-like [Vitis vinifera]	1.43038	0.00542976
BnaA06g22900D	NAC domain-containing protein 102	1.43007	0.00541751
BnaA01g00900D	Methylesterase 9	1.42998	0.00473659
BnaC01g31820D	UDP-glycosyltransferase 71B2	1.42988	1.46632e-10
BnaC03g16650D	UDP-glycosyltransferase 87A2	1.42828	0.00264038
BnaA07g14490D	tryptophan synthase beta type 2	1.42674	0.00235798
BnaC09g17380D	F-box/kelch-repeat protein At5g43190	1.42507	0.0205509
BnaA01g12840D	MATE efflux family protein	1.42379	0.00817119
BnaC04g52400D	myb domain protein 2	1.42096	0.00330511
BnaC08g15940D	#N/A	1.41846	0.0154475
BnaC06g19670D	Wall-associated receptor kinase-like 9	1.41139	3.4084e-07
BnaC07g09260D	Gibberellin 2-beta-dioxygenase 2	1.41139	0.0146209
BnaCnng70090D	Phenolic glucoside malonyltransferase 1	1.4093	0.000843646
BnaA05g19520D	UDP-glycosyltransferase 71B1-like	1.40838	0.0163719
BnaA02g14440D	#N/A	1.40773	0.0108034
BnaC04g05320D	protein EARLY FLOWERING 4	1.40477	0.0247272
BnaA05g05860D	Eukaryotic aspartyl protease family protein	1.4026	0.0105693
BnaA06g15020D	Wall-associated receptor kinase 4	1.39868	0.0375061
BnaA08g23190D	Alanine aminotransferase 1, mitochondrial	1.39859	0.000244366
BnaC01g03440D	SBP (S-ribonuclease binding protein) family protein	1.39517	0.0147258
BnaC02g23100D	VQ motif-containing protein 11	1.39265	0.0171431
BnaC01g13420D	5&apos;-adenylylsulfate reductase 3, chloroplastic	1.39032	0.00332737
BnaC07g34240D	Proline-rich extensin-like family protein	1.39019	0.00983066
BnaC04g45590D	SOUL heme-binding family protein	1.38649	0.00042732
BnaC08g26030D	exocyst subunit exo70 family protein H1	1.38627	0.0415273
BnaA07g31260D	Cytosolic sulfotransferase 16	1.38496	0.00308996
BnaA09g29540D	Glutathione S-transferase U13	1.38487	0.00402614
BnaCnng75490D	Nitrilase 2	1.38396	4.01759e-06
BnaCnng33350D	UDP-galactose/UDP-glucose transporter 4	1.38377	0.0237639
BnaA09g27480D	ribonuclease h protein at1g65750	1.37754	0.00517805
BnaC01g05180D	calmodulin-binding family protein	1.37742	0.0288885
BnaC02g40010D	Putative cysteine-rich receptor-like protein kinase 31	1.37669	0.021393
BnaA08g22100D	Probable galacturonosyltransferase-like 1	1.37309	0.000158846
BnaA08g21870D	Probable prolyl 4-hydroxylase 3	1.37194	0.0201789
BnaA08g11390D	UDP-glucosyl transferase 73B2	1.3687	4.43505e-05
BnaA02g08420D	Cytokinin dehydrogenase 3	1.36637	0.00450595
BnaC05g43770D	Galactose oxidase/kelch repeat superfamily protein	1.36443	0.0247269
BnaA08g27400D	Eukaryotic aspartyl protease family protein	1.36154	0.0149959
BnaC09g02080D	Ninja-family protein AFP3	1.3589	0.000301482
BnaC09g22350D	cfe protein	1.35778	0.000973017
BnaA06g26150D	Leucine-rich repeat (LRR) family protein	1.35665	0.00515486
BnaA09g14900D	Cytosolic sulfotransferase 18	1.35572	6.83154e-06
BnaC04g36630D	alpha/beta-Hydrolases superfamily protein	1.35344	0.029794
BnaA07g28390D	Protein NRT1/ PTR FAMILY 2.13	1.34691	3.42582e-05
BnaCnng41720D	serine/threonine-protein kinase-like protein CCR4	1.34489	0.0185565
BnaC03g05850D	Aldolase-type TIM barrel family protein	1.34206	0.00842677
BnaA08g08010D	RING-H2 finger protein ATL56	1.34154	0.0148666
BnaA07g24020D	Glutathione S-transferase U11	1.34148	0.00124104
BnaA05g13030D	Glutamate receptor 2.8	1.34135	0.0334597
BnaCnng01370D	Chitinase family protein	1.34073	0.0244883
BnaA01g20950D	Phytosulfokines 3	1.34051	0.00103107
BnaC02g43120D	Octicosapeptide/Phox/Bem1p family protein	1.34025	0.00216392
BnaA04g28640D	Metal tolerance protein B	1.33941	1.26415e-07
BnaAnng35820D	Pentatricopeptide repeat-containing protein At5g66500, mitochondrial	1.33919	0.00316151
BnaA08g29560D	MATE efflux family protein 1	1.33867	0.000248242
BnaCnng41920D	structural constituent of ribosome	1.33791	0.00309105
BnaC04g21550D	serine protease inhibitor, Kazal-type family protein	1.33669	0.0218537
BnaC03g48520D	Zinc finger protein AZF1	1.33458	0.00186326
BnaA05g07060D	DNAse I-like superfamily protein	1.3317	0.0392437
BnaA03g32960D	Phox-associated domain\x3bPhox-like\x3bSorting nexin, C-terminal	1.33042	0.0288885
BnaC09g19110D	Protein kinase superfamily protein	1.32987	0.000349927
BnaA04g08710D	tryptophan synthase beta type 2	1.32842	0.00517805
BnaC08g28550D	Guanylate kinase 2	1.3233	2.28638e-05
BnaC07g51280D	Tryptophan N-monooxygenase 1	1.32263	0.00141199
BnaA08g20880D	UDP-glycosyltransferase 85A5	1.32262	0.0260754
BnaC07g34450D	Calcineurin B-like protein 1	1.32208	0.00357203
BnaCnng32080D	9-cis-epoxycarotenoid dioxygenase NCED3, chloroplastic	1.32152	0.00655741
BnaA01g26430D	Polyol transporter 5	1.32037	0.0102419
BnaAnng16330D	Oxysterol-binding protein-related protein 1C	1.31994	0.00788915
BnaC01g23420D	Protein STRICTOSIDINE SYNTHASE-LIKE 6	1.31952	0.0225347
BnaC05g14270D	Cytosolic sulfotransferase 17	1.3191	0.0152781
BnaC04g50700D	transmembrane protein-related	1.31778	0.0373881
BnaA09g34080D	S-adenosyl-L-methionine-dependent methyltransferases superfamily protein	1.31351	0.0243945
BnaA08g29070D	Probable protein phosphatase 2C 4	1.31293	0.0361477
BnaC04g38910D	Probable WRKY transcription factor 45	1.31252	0.00279514
BnaC07g45180D	GATA transcription factor 3	1.31227	0.0188585
BnaC04g45730D	GDSL esterase/lipase At2g38180	1.31022	0.0405111
BnaA08g22970D	D-3-phosphoglycerate dehydrogenase 2, chloroplastic	1.30963	0.0226598
BnaA08g26300D	Germin-like protein subfamily 2 member 1	1.30927	0.000645841
BnaA06g38160D	fucosyltransferase 6	1.30907	0.0257194
BnaC07g28600D	probable L-cysteine desulfhydrase, chloroplastic	1.30889	0.000444174
BnaA09g44230D	Pathogenesis-related thaumatin superfamily protein	1.30682	0.0239528
BnaA02g29770D	Thioredoxin-like fold	1.30264	2.84359e-09
BnaA03g16020D	Fatty acid 2-hydroxylase 1	1.30147	0.000197024
BnaC01g25570D	Protein EDS1	1.29957	0.0344956
BnaC06g38340D	Beta-1,3-galactosyltransferase 7	1.29846	0.000489028
BnaC07g35250D	Peroxisomal (S)-2-hydroxy-acid oxidase GLO5	1.2975	0.0184999
BnaA03g59960D	WRKY transcription factor 6	1.29084	0.0376722
BnaA03g22820D	mediator of aba-regulated dormancy 1	1.29005	0.0392437
BnaC07g45720D	Probable serine/threonine-protein kinase Cx32, chloroplastic	1.28992	0.0130454
BnaA01g10650D	Probable UDP-arabinose 4-epimerase 3	1.28975	0.00558403
BnaC02g35940D	Cytochrome P450 71B19	1.28712	0.000741006
BnaAnng37580D	Phosphate transporter PHO1 homolog 3	1.2869	0.00889614
BnaA03g58220D	Ubiquinone biosynthesis O-methyltransferase, mitochondrial	1.28667	9.23092e-05
BnaA01g20710D	O-acyltransferase (WSD1-like) family protein	1.28658	0.00656827
BnaA01g13500D	Helicase protein with RING/U-box domain	1.28247	0.0152682
BnaAnng33700D	UDP-galactose/UDP-glucose transporter 4	1.28237	0.00473659
BnaCnng05510D	Glycerophosphodiester phosphodiesterase GDPD1, chloroplastic	1.28154	0.000661796
BnaC03g45680D	Plant basic secretory protein (BSP) family protein	1.27868	5.65069e-05
BnaA01g12320D	Probable trehalose-phosphate phosphatase G	1.27696	0.0170016
BnaA08g06720D	O-methyltransferase family protein	1.27626	0.0467714
BnaC07g25950D	Cytochrome P450 85A2	1.27574	0.0118162
BnaC06g36030D	Isoflavone reductase homolog P3	1.27495	0.000578246
BnaA01g10030D	UDP-Glycosyltransferase superfamily protein	1.27055	0.00389432
BnaC03g05820D	Ethylene-responsive transcription factor ERF113	1.26879	0.0132227
BnaA06g18470D	Transducin/WD40 repeat-like superfamily protein	1.26712	0.00023482
BnaA02g32550D	pseudo-response regulator 5	1.26617	0.0271414
BnaA01g32220D	exocyst subunit exo70 family protein H4	1.266	2.15444e-08
BnaC07g17980D	Calcium-binding protein CML42	1.26512	0.0293346
BnaA07g09780D	#N/A	1.26437	0.00693171
BnaC03g74630D	MATE efflux family protein	1.26081	0.0039648
BnaC05g01140D	chitinase 10-like	1.25966	0.0476703
BnaA05g01520D	G-box-binding factor 3	1.25539	0.00776596
BnaAnng29100D	Protein kinase superfamily protein	1.25427	0.00474002
BnaC02g24840D	F-box protein At1g78100	1.2512	0.0276861
BnaC09g03670D	Sugar transport protein 13	1.24946	0.00160492
BnaA03g36080D	Mannosyl-oligosaccharide 1,2-alpha-mannosidase MNS2	1.23923	0.0499583
BnaCnng28090D	U-box domain-containing protein 18	1.2385	0.0489334
BnaC07g26660D	RPM1-interacting protein 4	1.23792	0.0307407
BnaA02g05990D	Serine carboxypeptidase S28 family protein	1.23627	0.0166899
BnaC08g05930D	UDP-glycosyltransferase 85A5	1.23576	0.045395
BnaA03g47050D	membrane-anchored ubiquitin-fold protein 3-like	1.23534	0.0281382
BnaC03g62330D	RING-H2 finger protein ATL45-like	1.23249	0.0159804
BnaA04g05430D	Lipase-like PAD4	1.23235	8.6281e-05
BnaC04g42730D	Acyl-CoA N-acyltransferases (NAT) superfamily protein	1.22956	0.0169841
BnaA09g28960D	Putative pentatricopeptide repeat-containing protein At1g26500	1.2228	0.0474788
BnaC08g37940D	Glutathione S-transferase U24	1.21885	0.00361992
BnaA04g05470D	Syntaxin-122	1.21836	0.000580188
BnaA06g30160D	Cysteine-rich repeat secretory protein 55	1.21834	0.0229357
BnaA08g23150D	Protein TIFY 11A	1.21775	0.0222839
BnaA10g24690D	UDP-glycosyltransferase 76C2	1.2139	0.0212676
BnaC06g34640D	Core-2/I-branching beta-1,6-N-acetylglucosaminyltransferase family protein	1.21133	0.00880344
BnaC01g25960D	O-acyltransferase (WSD1-like) family protein	1.21008	0.00168153
BnaA09g33120D	#N/A	1.20785	0.0414839
BnaA02g18110D	Probable inorganic phosphate transporter 1-9	1.20625	0.000384021
BnaC09g47650D	Serine carboxypeptidase-like 35	1.20562	0.0269095
BnaA05g34540D	Zinc finger CCCH domain-containing protein 29	1.20257	0.0273308
BnaC04g05720D	Eukaryotic aspartyl protease family protein	1.20211	0.000358611
BnaA09g11710D	E3 ubiquitin-protein ligase RHA1B-like	1.20104	0.0441607
BnaA06g31160D	AIG2-like (avirulence induced gene) family protein	1.20083	0.0241457
BnaA07g28420D	Actin cross-linking protein	1.20055	0.0423062
BnaA09g20370D	5&apos;-adenylylsulfate reductase 1, chloroplastic	1.19903	0.0102813
BnaC03g33280D	Heat stress transcription factor A-1e	1.19859	0.033996
BnaCnng76260D	Late embryogenesis abundant (LEA) hydroxyproline-rich glycoprotein family	1.19608	0.000727373
BnaC09g47250D	Protein ATAF2	1.19606	0.0066211
BnaCnng60930D	Nitrate reductase	1.19352	0.019582
BnaC03g46720D	UDP-glycosyltransferase 90A1	1.19109	0.0414839
BnaA06g28280D	L-cysteine desulfhydrase	1.1851	0.0220019
BnaC08g02910D	Transducin/WD40 repeat-like superfamily protein	1.18335	0.0264883
BnaA07g26080D	Probable inactive leucine-rich repeat receptor-like protein kinase At1g66830	1.18111	0.0116533
BnaCnng08300D	Isochorismate synthase 1, chloroplastic	1.17633	0.00207178
BnaC03g06820D	tyrosyl-DNA phosphodiesterase-related	1.17349	0.0425834
BnaCnng47170D	Adenylyl-sulfate kinase 1, chloroplastic	1.17322	1.00683e-05
BnaC08g18710D	Probable galacturonosyltransferase-like 1	1.1699	0.0118358
BnaA10g00280D	NAC domain-containing protein 2	1.16863	0.0223732
BnaC09g22760D	5&apos;-adenylylsulfate reductase 1, chloroplastic	1.16857	0.00672638
BnaA10g08770D	IAA-amino acid hydrolase ILR1-like 6	1.16801	0.0129755
BnaC01g10100D	Ethylene-responsive transcription factor 1A	1.16693	0.0297329
BnaA01g19120D	ATP-sulfurylase 3, chloroplastic	1.16608	0.00610969
BnaC01g33830D	Polyol transporter 5	1.16449	0.0106907
BnaA02g05730D	Probable WRKY transcription factor 38	1.16135	0.0385716
BnaAnng11660D	SBP (S-ribonuclease binding protein) family protein	1.16084	0.000974224
BnaA03g29990D	auxin-induced in root cultures protein 12-like	1.15971	0.012217
BnaA03g50940D	Cyclase family protein	1.15841	0.00517338
BnaA02g12230D	Late embryogenesis abundant (LEA) hydroxyproline-rich glycoprotein family	1.15782	0.000895444
BnaA04g05420D	Lipase-like PAD4	1.1571	0.000423492
BnaC02g31270D	LRR receptor-like serine/threonine-protein kinase EFR	1.15527	0.0102689
BnaA07g14730D	NAC domain containing protein 6	1.15461	0.0168678
BnaC06g27190D	Probable metal-nicotianamine transporter YSL7	1.15383	0.00538092
BnaA04g16440D	Dof zinc finger protein DOF2.1	1.14942	0.000493004
BnaA06g14950D	O-methyltransferase family protein	1.14929	0.0365131
BnaAnng27200D	Cytosolic sulfotransferase 16	1.14872	0.000143766
BnaA09g34860D	exocyst subunit exo70 family protein H1	1.14842	0.0456128
BnaA02g23230D	L-type lectin-domain containing receptor kinase IV.1	1.14784	0.0144163
BnaA01g15250D	Protein phosphatase 2C 56	1.14756	0.000584498
BnaC03g53780D	Arogenate dehydratase/prephenate dehydratase 6, chloroplastic	1.14646	0.0260647
BnaC07g37780D	UDP-galactose/UDP-glucose transporter 2	1.14418	0.00390334
BnaC07g43320D	Probable WRKY transcription factor 11	1.14078	0.0132747
BnaC02g22640D	Cytosolic sulfotransferase 16	1.13884	0.00257397
BnaC04g34300D	Phenolic glucoside malonyltransferase 1	1.13771	0.0427475
BnaC04g50970D	Homeobox-leucine zipper protein ATHB-7	1.13706	0.0129755
BnaA06g00850D	Persulfide dioxygenase ETHE1 homolog, mitochondrial	1.13603	0.0107949
BnaC01g41020D	Glycosyl hydrolase family protein with chitinase insertion domain	1.13378	0.0147258
BnaC01g12180D	Probable UDP-arabinose 4-epimerase 3	1.1328	0.00628583
BnaC07g29610D	Probable folate-biopterin transporter 2	1.13097	0.0331903
BnaC09g07960D	Protein DA1-related 6	1.12923	1.57166e-06
BnaC04g25500D	O-Glycosyl hydrolases family 17 protein	1.12752	0.0131915
BnaC01g20850D	Mannan endo-1,4-beta-mannosidase 5	1.12668	0.0288885
BnaA05g16830D	ATP sulfurylase 1, chloroplastic	1.12557	2.84359e-09
BnaC07g36450D	ethylene-responsive nuclear protein -related	1.1226	0.0177011
BnaC02g35040D	Probable inactive purple acid phosphatase 9	1.12222	0.00281945
BnaC06g00640D	IAA-amino acid hydrolase ILR1-like 6	1.12032	0.0149959
BnaA03g45680D	UDP-galactose/UDP-glucose transporter 2	1.11787	0.00297093
BnaC08g48340D	Protein TIFY 11A	1.11363	0.0420086
BnaCnng52980D	Pyruvate kinase family protein	1.10957	0.0160937
BnaA04g09150D	Phenolic glucoside malonyltransferase 1	1.10933	0.017945
BnaC06g35000D	Cytosolic sulfotransferase 16	1.10747	0.0431055
BnaC04g48620D	Transcription factor JUNGBRUNNEN 1	1.10671	0.0276861
BnaC02g15050D	Scarecrow-like protein 8	1.10463	0.0367667
BnaC04g50320D	Cytochrome P450 76C2	1.10205	0.0062053
BnaA05g33990D	Receptor-like serine/threonine-protein kinase At3g01300	1.09898	0.0344517
BnaC03g67520D	Probable WRKY transcription factor 11	1.09039	0.0342015
BnaC07g40100D	Protein phosphatase 2C 56	1.08947	0.000493004
BnaA07g28460D	Glutathione S-transferase U12	1.08691	0.000984668
BnaC04g36600D	Probable inactive receptor-like protein kinase At1g65250	1.07952	0.0281382
BnaC05g42570D	Serine carboxypeptidase-like 7	1.07751	0.0423062
BnaC04g40510D	Metal tolerance protein B	1.07587	0.000628812
BnaA04g11530D	Phenolic glucoside malonyltransferase 1	1.07433	0.0163056
BnaA03g00840D	Cysteine proteinases superfamily protein	1.07217	0.0418099
BnaA09g41960D	Spermidine sinapoyl CoA acyltransferase	1.07069	2.27113e-07
BnaA03g50030D	#N/A	1.07011	0.0395667
BnaC09g01120D	#N/A	1.0645	0.00294676
BnaCnng15960D	NAC domain-containing protein 8	1.06396	0.0125273
BnaC06g06410D	Ribosomal protein L18ae family	1.06236	0.00880344
BnaCnng56320D	Heat stress transcription factor B-1	1.05937	0.00355527
BnaA10g00970D	Mannan endo-1,4-beta-mannosidase 1	1.0587	0.0121864
BnaC07g37060D	5&apos;-adenylylsulfate reductase 3, chloroplastic	1.05861	0.02914
BnaC09g33920D	Zinc finger CCCH domain-containing protein 66	1.05846	0.0053985
BnaA05g34380D	probable polyamine oxidase 2	1.05779	0.000194241
BnaC08g18090D	Transcription factor MYB51	1.0562	0.0243278
BnaA06g02990D	Cytochrome P450 72A11	1.05599	0.0174743
BnaA09g35450D	Alpha/beta hydrolase related protein	1.05515	0.00606655
BnaA03g01690D	Anthranilate synthase alpha subunit 1, chloroplastic	1.05452	0.0298393
BnaA10g29460D	Zinc finger CCCH domain-containing protein 66	1.0523	0.0105891
BnaA02g27300D	Cytosolic sulfotransferase 12	1.05223	0.00165815
BnaC03g49620D	U-box domain-containing protein 27	1.05001	0.00726831
BnaC01g15760D	UDP-glucose 4-epimerase 2	1.04584	0.0476937
BnaC07g18820D	Protein kinase superfamily protein	1.04481	0.0448932
BnaA08g20870D	Class-II DAHP synthetase family protein	1.04426	1.07007e-06
BnaA02g05220D	Leucine-rich repeat (LRR) family protein	1.04372	0.0271414
BnaA09g32500D	Core-2/I-branching beta-1,6-N-acetylglucosaminyltransferase family protein	1.04344	0.00806024
BnaC07g35490D	Ubiquinone biosynthesis O-methyltransferase, mitochondrial	1.04262	0.00543185
BnaC07g43490D	WRKY transcription factor 18	1.04062	0.00322747
BnaA10g04330D	1-aminocyclopropane-1-carboxylate oxidase homolog 1	1.04001	0.00402831
BnaC08g25010D	S-adenosyl-L-methionine-dependent methyltransferases superfamily protein	1.03996	0.00648802
BnaA03g40940D	Probable calcium-binding protein CML41	1.03537	5.05684e-05
BnaCnng70900D	nonsense-mediated mrna decay protein 2-like	1.03388	0.0246485
BnaC03g46730D	Arabidopsis phospholipase-like protein (PEARLI 4) family	1.03323	0.0474774
BnaAnng00100D	CBL-interacting serine/threonine-protein kinase 14	1.03315	0.000647553
BnaA09g29790D	UDP-glycosyltransferase 74B1	1.03197	0.00413178
BnaA02g27860D	Cytochrome P450 71B22	1.02993	0.0287255
BnaC03g71800D	Glucose-6-phosphate/phosphate translocator 1, chloroplastic	1.0288	0.019227
BnaC04g41500D	2-oxoglutarate (2OG) and Fe(II)-dependent oxygenase superfamily protein	1.02333	0.00445669
BnaA08g04520D	Cytochrome P450 83B1	1.02239	0.0461943
BnaCnng06220D	D-xylose-proton symporter-like 1	1.02235	0.00798097
BnaC04g09100D	#N/A	1.02164	0.0286215
BnaCnng24690D	E3 ubiquitin-protein ligase ATL6	1.01841	0.0482831
BnaA05g05330D	transmembrane protein-related	1.01576	0.0389102
BnaCnng69860D	Probable calcium-binding protein CML41	1.01395	0.0142171
BnaC08g24800D	L-type lectin-domain containing receptor kinase IV.2	1.01005	0.000107204
BnaA09g35520D	Glucose-methanol-choline (GMC) oxidoreductase family protein	1.00717	0.0172392
BnaA02g26980D	Encodes a protein whose expression is responsive to nematode infection.	1.00691	0.0158752
BnaA09g36710D	Agamous-like MADS-box protein AGL18	1.00558	0.0224431
BnaC06g30610D	Leucine-rich repeat (LRR) family protein	1.00398	0.0112764
BnaA08g14900D	Arabidopsis protein of unknown function (DUF241)	1.00039	0.0378945

## Sheet: Incomp vs Basal_down_DEGs
Down-regulated DEGs identified by comparing 'Incomp' versus 'Basal'.
Gene_ID	Annotation	Log2_fold_change	padj
BnaC08g49970D	alpha/beta-Hydrolases superfamily protein	-1.00214	0.0137817
BnaA06g26860D	Transducin/WD40 repeat-like superfamily protein	-1.0033	0.0278241
BnaC06g15420D	GATA transcription factor 8	-1.01837	0.00538077
BnaA05g14890D	Beta-D-glucopyranosyl abscisate beta-glucosidase	-1.01858	0.0390716
BnaC08g48630D	myb domain protein 77	-1.0195	0.0383855
BnaA06g17350D	Chlorophyll a-b binding protein 4, chloroplastic	-1.02264	0.000250626
BnaC06g11000D	RING/U-box superfamily protein	-1.02427	0.000174208
BnaCnng26840D	Rac-like GTP-binding protein ARAC4	-1.02523	0.00958788
BnaC05g19300D	Probable galacturonosyltransferase-like 8	-1.02892	0.00466266
BnaC05g07770D	formin-like protein 18	-1.03841	0.0184015
BnaC04g52770D	Basic leucine zipper 34	-1.04212	0.00538821
BnaC05g50610D	Tubulin alpha-4 chain	-1.04712	0.0319249
BnaA07g12260D	SKU5 similar 17	-1.04964	0.00452276
BnaC06g22700D	mediator of aba-regulated dormancy 1	-1.05427	0.0108838
BnaC08g48860D	PTI1-like tyrosine-protein kinase 3	-1.05441	0.00486463
BnaA10g00380D	Cytochrome P450 86A4	-1.06289	0.0252711
BnaA09g38500D	Phosphoglycerate mutase family protein	-1.06595	0.0412431
BnaC07g12460D	RING/U-box superfamily protein	-1.06807	0.0376802
BnaC07g20690D	#N/A	-1.06813	0.021368
BnaA04g23170D	Jacalin-related lectin 22	-1.06845	0.0149831
BnaC08g46880D	NAC domain-containing protein 8	-1.06995	0.0249453
BnaAnng09400D	Putative endonuclease or glycosyl hydrolase	-1.07058	0.00515578
BnaA07g30330D	Protein ELF4-LIKE 2	-1.07696	0.00726831
BnaC05g21010D	Transducin/WD40 repeat-like superfamily protein	-1.07758	0.00403609
BnaA03g57380D	#N/A	-1.07878	0.0361013
BnaA06g30750D	COBRA-like protein 2	-1.08115	0.00397678
BnaC04g18290D	Probable mediator of RNA polymerase II transcription subunit 37c	-1.08266	0.0407763
BnaA10g23680D	IQ-domain 24	-1.08332	0.00277066
BnaC06g36040D	Isoflavone reductase homolog P3	-1.08677	0.00226993
BnaC08g32630D	Glutaredoxin-C11	-1.09138	0.0177925
BnaC05g20150D	Probable mediator of RNA polymerase II transcription subunit 37c	-1.09703	0.00335561
BnaA06g33600D	GDSL esterase/lipase At2g03980	-1.09837	0.00149627
BnaC05g04010D	carboxylate clamp-tetratricopeptide repeat protein	-1.10101	0.0417303
BnaA02g11080D	TraB family protein	-1.10909	0.00827101
BnaC09g42120D	O-fucosyltransferase family protein	-1.11056	0.0152463
BnaA04g29300D	Abscisic acid receptor PYL6	-1.12255	0.0281117
BnaA03g53280D	#N/A	-1.12659	0.015945
BnaC07g18520D	Homeodomain-like superfamily protein	-1.13295	0.0348525
BnaA03g56310D	Probable membrane-associated kinase regulator 6	-1.13467	0.0371326
BnaC02g46320D	Copper transporter 5	-1.14076	0.000402488
BnaA07g13830D	Auxin response factor 10	-1.14163	0.000574141
BnaC09g05370D	Ethylene-responsive transcription factor ERF107	-1.14315	0.0264151
BnaAnng09540D	Fasciclin-like arabinogalactan protein 18	-1.14643	0.000161386
BnaC08g42500D	Oligopeptide transporter 2	-1.14722	0.0222169
BnaC01g08110D	Probable xyloglucan endotransglucosylase/hydrolase protein 17	-1.15455	0.00762067
BnaA05g25770D	Probable polyamine transporter At3g13620	-1.15821	0.0036805
BnaC08g32430D	Xyloglucan 6-xylosyltransferase 1	-1.16872	0.00919143
BnaA02g08820D	Heat shock protein 90-4	-1.17242	0.0224895
BnaCnng33070D	AP2/ERF and B3 domain-containing transcription factor RAV1	-1.17843	0.00118071
BnaC06g07780D	Glucuronoxylan 4-O-methyltransferase 3	-1.17992	0.0272422
BnaA08g16950D	PI-PLC X-box domain-containing protein DDB_G0293730	-1.18146	0.000895444
BnaA01g34090D	ELMO/CED-12 family protein	-1.18563	0.000141172
BnaA02g35440D	Heat shock protein 90-4	-1.18844	0.0306638
BnaA06g24410D	Protein kinase superfamily protein	-1.18945	0.0267978
BnaA10g25070D	Peroxidase 52	-1.19033	0.0185888
BnaA10g04800D	Serine/arginine-rich splicing factor SR45a	-1.19383	0.046335
BnaC05g43540D	Fes1A	-1.19894	0.00061216
BnaC07g49290D	Pectin lyase-like superfamily protein	-1.20363	8.88913e-05
BnaA01g16310D	Probable NAD(P)H dehydrogenase (quinone) FQR1-like 1	-1.20481	0.0210463
BnaA05g12830D	TRAM, LAG1 and CLN8 (TLC) lipid-sensing domain containing protein	-1.20506	0.0379549
BnaC08g39830D	RING/U-box superfamily protein	-1.20911	0.0102364
BnaA09g29100D	Heat shock 70 kDa protein 18	-1.21302	0.048425
BnaC08g42390D	Transcription factor bHLH74	-1.21468	0.0359901
BnaA03g24840D	Heat stress transcription factor B-2b	-1.21804	0.00919512
BnaA06g27900D	Ethylene-responsive transcription factor TINY	-1.2328	0.0319249
BnaC01g36030D	Auxin-responsive protein IAA19	-1.23374	0.0353108
BnaC03g60130D	PI-PLC X-box domain-containing protein DDB_G0293730	-1.23553	0.0417766
BnaC07g46340D	GTP-binding protein SAR1A	-1.23567	0.000670087
BnaA10g12450D	Telomere repeat-binding protein 1	-1.23808	0.0272783
BnaA08g31110D	#N/A	-1.24376	0.0276183
BnaA09g37270D	Basic leucine zipper 61	-1.25955	0.000786609
BnaC05g20140D	Eukaryotic translation initiation factor 5A-2	-1.2621	0.0365131
BnaA05g27090D	serine/arginine-rich SC35-like splicing factor SCL30A isoform X1	-1.2626	0.0037546
BnaC05g08700D	PLAC8 family protein	-1.26534	0.00248597
BnaA09g29110D	Probable mediator of RNA polymerase II transcription subunit 37c	-1.26577	0.00393501
BnaA09g42140D	Indole-3-acetic acid-amido synthetase GH3.3	-1.26767	0.0141364
BnaA04g23830D	Glutaredoxin family protein	-1.27331	0.0044448
BnaC09g15650D	#N/A	-1.27399	8.97975e-06
BnaC09g38370D	#N/A	-1.28005	0.0180978
BnaA10g02490D	Auxin-responsive protein IAA3	-1.2811	0.00361992
BnaA07g29680D	Sucrose transport protein SUC1	-1.28669	0.000395343
BnaA03g19810D	Basic leucine zipper 34	-1.29007	0.000856871
BnaCnng17280D	#N/A	-1.29539	0.0474774
BnaA03g38170D	#N/A	-1.29563	0.0011592
BnaC01g41690D	Probable aquaporin TIP2-2	-1.29669	0.0360251
BnaA06g10250D	Gibberellin 3-beta-dioxygenase 1	-1.30104	0.0432376
BnaA09g18540D	#N/A	-1.30188	0.021368
BnaC07g12880D	protein translocase subunit isoform x1	-1.30278	0.0425028
BnaA10g02180D	protein e6-like	-1.30348	0.0357629
BnaA05g25270D	Chaperone DnaJ-domain superfamily protein	-1.30581	0.000215489
BnaC05g10970D	MACPF domain-containing protein At1g14780	-1.30796	0.0181505
BnaA10g00360D	Aquaporin PIP1-3	-1.31416	2.24496e-05
BnaC05g22050D	HXXXD-type acyl-transferase family protein	-1.31422	0.0132429
BnaA04g17820D	Pentatricopeptide repeat-containing protein At2g30780	-1.31748	0.0417169
BnaC03g74360D	#N/A	-1.32576	0.00540805
BnaA07g30160D	Chaperone DnaJ-domain superfamily protein	-1.33092	0.0167811
BnaA02g00820D	#N/A	-1.33267	0.0382017
BnaCnng41650D	F-box protein PP2-A11	-1.33406	0.00248533
BnaA07g02490D	Protein EXORDIUM-like 5	-1.33653	0.045395
BnaA07g38130D	Abscisic acid receptor PYL8	-1.33889	0.00559277
BnaA10g03900D	carboxylate clamp-tetratricopeptide repeat protein	-1.3505	0.00543185
BnaC01g05520D	Homeobox-leucine zipper protein ATHB-8	-1.35137	0.0414557
BnaC05g04450D	#N/A	-1.35197	0.0261464
BnaC03g65970D	Transcription factor bHLH63	-1.35557	0.0219534
BnaC03g23770D	cold-regulated protein	-1.35939	0.000202404
BnaAnng12070D	Heat shock 70 kDa protein 18	-1.36018	0.00153828
BnaA06g06160D	Glutathione S-transferase U17	-1.36534	0.00967232
BnaA07g10420D	RING/U-box protein with domain of unknown function (DUF 1232)	-1.36748	0.0272422
BnaC04g48100D	Putative actin-5	-1.36952	0.00227229
BnaC03g56620D	Cytosolic sulfotransferase 10	-1.37334	0.0267842
BnaA03g40730D	PTEN 3	-1.37442	0.0239345
BnaC07g20780D	Homeobox-leucine zipper protein ATHB-17	-1.37507	0.0495196
BnaA09g01390D	Xyloglucan endotransglucosylase/hydrolase protein 9	-1.37526	0.00118071
BnaC03g39560D	Aquaporin TIP2-1	-1.37772	0.0408403
BnaA01g06490D	low temperature and salt responsive protein	-1.38117	0.00583786
BnaAnng17910D	probable desiccation-related protein LEA14	-1.38243	0.000286373
BnaA07g33310D	Alcohol dehydrogenase class-P	-1.39082	0.00488018
BnaA09g15030D	#N/A	-1.39256	5.64126e-09
BnaC09g19060D	Haloacid dehalogenase-like hydrolase (HAD) superfamily protein	-1.39342	0.0219082
BnaC05g07890D	Glutathione S-transferase U17	-1.39573	0.00237658
BnaAnng12060D	Heat shock 70 kDa protein 18	-1.40321	0.000309269
BnaA08g00250D	Sec14p-like phosphatidylinositol transfer family protein	-1.40569	0.000155827
BnaCnng38770D	#N/A	-1.40707	0.0457983
BnaA04g19530D	NAC domain containing protein 41	-1.41331	0.0118024
BnaA06g12480D	Protein REVEILLE 7-like	-1.4173	0.0277939
BnaA08g17380D	CSC1-like protein ERD4	-1.42367	0.000713799
BnaC06g00660D	#N/A	-1.4253	0.00873222
BnaC03g73070D	Heat stress transcription factor B-2b	-1.42573	0.0058444
BnaC01g36750D	Terpenoid synthase 25	-1.4464	0.0275677
BnaC01g24440D	C2H2-type zinc finger family protein	-1.44704	0.00879067
BnaA10g22750D	probable E3 ubiquitin-protein ligase ARI16	-1.45335	0.000578885
BnaCnng02110D	TRAF-like family protein	-1.45425	0.000595615
BnaA06g09010D	RING/U-box superfamily protein	-1.45523	0.00203913
BnaCnng33310D	Tetratricopeptide repeat (TPR)-like superfamily protein	-1.45971	0.00501806
BnaC05g05130D	Serine/arginine-rich splicing factor SR45a	-1.46066	0.00273672
BnaA06g36780D	Squamosa promoter-binding-like protein 2	-1.4615	0.0109194
BnaC07g44490D	Inositol-tetrakisphosphate 1-kinase 2	-1.46535	0.0237639
BnaC08g23330D	ARM repeat superfamily protein	-1.47059	0.0371893
BnaA08g27390D	Eukaryotic aspartyl protease family protein	-1.47499	0.0225699
BnaC07g31640D	myb domain protein 77	-1.4806	0.00515486
BnaC02g07740D	Auxin-responsive protein SAUR21	-1.4817	0.0408403
BnaA06g09760D	#N/A	-1.48908	0.0344121
BnaC07g26360D	Heavy metal transport/detoxification superfamily protein	-1.48977	0.00436051
BnaA01g14840D	C2H2-like zinc finger protein	-1.4944	0.0332655
BnaAnng36550D	Auxin-responsive protein SAUR21	-1.49489	0.0409496
BnaC08g36620D	N-MYC downregulated-like 3	-1.49726	0.0433624
BnaC08g19180D	Jacalin-related lectin 3	-1.50761	0.00775304
BnaC08g32450D	Beta-glucosidase 10	-1.51115	0.000160105
BnaC07g34350D	Homeobox-leucine zipper protein HAT1	-1.51229	0.00321968
BnaC01g08120D	Probable xyloglucan endotransglucosylase/hydrolase protein 18	-1.52194	0.0139327
BnaAnng05640D	Homeodomain-like superfamily protein	-1.52712	0.0181577
BnaC06g35220D	Chaperone protein ClpB1	-1.52834	0.0352471
BnaC07g11600D	Translin family protein	-1.53042	0.0413546
BnaC03g73550D	Adenine nucleotide alpha hydrolases-like superfamily protein	-1.53441	0.0336952
BnaA01g05190D	SAUR-like auxin-responsive protein family	-1.53938	0.0205199
BnaA06g23500D	#N/A	-1.54041	0.0115677
BnaA06g07050D	PLAC8 family protein	-1.54116	3.82677e-05
BnaC03g41070D	formin-like protein 18	-1.55076	0.000944451
BnaC05g07900D	Glutathione S-transferase U17	-1.55118	0.00102038
BnaC04g52000D	Tetratricopeptide repeat (TPR)-like superfamily protein	-1.55166	1.18716e-06
BnaA03g51960D	Auxin-responsive protein IAA29	-1.55286	0.0262582
BnaC08g20020D	Ethylene-responsive transcription factor ERF012	-1.56512	0.0235496
BnaA09g40950D	C2 calcium-dependent membrane targeting	-1.57585	0.0460032
BnaC07g17610D	Cellulose synthase A catalytic subunit 4	-1.57944	0.00409719
BnaC03g23710D	Basic leucine zipper 34	-1.58029	1.89117e-06
BnaC03g39420D	Coatomer subunit beta&apos;-3	-1.58515	0.031033
BnaA03g07050D	protein transport, Golgi organization COG complex component, COG2	-1.58893	0.0366254
BnaA07g25620D	Zinc finger protein 4	-1.59869	0.0344121
BnaA08g17910D	Auxin-responsive protein SAUR61	-1.60135	0.0271631
BnaC01g20800D	E3 ubiquitin-protein ligase RMA2	-1.60181	3.18576e-06
BnaA09g00010D	TRAF-like family protein	-1.60377	2.52666e-08
BnaC03g49670D	#N/A	-1.60761	0.0151687
BnaAnng12050D	Probable mediator of RNA polymerase II transcription subunit 37c	-1.60815	0.0021889
BnaA03g44850D	#N/A	-1.60913	0.034748
BnaC09g17950D	Fasciclin-like arabinogalactan protein 13	-1.61415	0.00592329
BnaC01g27600D	Heat shock 70 kDa protein 18	-1.61572	0.000394349
BnaC05g11320D	#N/A	-1.61796	0.00103463
BnaA08g17920D	Auxin-responsive protein SAUR64	-1.62127	0.0249453
BnaA08g19090D	sporulation-specific protein 15	-1.62335	0.0147258
BnaA03g43080D	Homeobox-leucine zipper protein HAT1	-1.62529	0.0380504
BnaC04g34370D	tryptophan synthase beta type 2	-1.62691	0.0226433
BnaA06g15240D	l-type lectin-domain containing receptor kinase -like	-1.62985	0.0132227
BnaA06g40800D	Expansin-like A2	-1.6405	0.0145648
BnaA03g25640D	#N/A	-1.65011	0.00328056
BnaC02g07850D	Auxin-responsive protein SAUR21	-1.65089	0.00983066
BnaA03g40690D	Transcription factor MYB44	-1.65547	0.00484838
BnaC02g12700D	Heat shock protein 90-3	-1.65957	0.00141844
BnaA08g21310D	L-type lectin-domain containing receptor kinase I.7-like	-1.66087	0.00592329
BnaC07g41080D	Protein BOBBER 2	-1.66135	0.00429256
BnaC05g14070D	Protein REVEILLE 7-like	-1.66141	1.72535e-05
BnaA03g07430D	S-adenosylmethionine decarboxylase proenzyme 4	-1.66314	0.0433624
BnaA04g25040D	carboxylate clamp-tetratricopeptide repeat protein	-1.66762	0.00992532
BnaA04g27220D	Xyloglucan 6-xylosyltransferase 1	-1.67186	1.53719e-05
BnaC07g06340D	Protein EXORDIUM-like 5	-1.67276	0.0091345
BnaC01g01990D	GTP-binding protein SAR1A	-1.6793	0.00289288
BnaA08g31570D	Cytosolic sulfotransferase 10	-1.68079	0.0223004
BnaAnng29870D	Ethylene-responsive transcription factor ERF012	-1.68293	0.0277939
BnaC01g07710D	low temperature and salt responsive protein	-1.68299	0.000244366
BnaC03g61550D	myb domain protein 73	-1.68592	0.00403704
BnaC01g27590D	Probable mediator of RNA polymerase II transcription subunit 37c	-1.69046	0.0481668
BnaA07g22300D	Chaperone protein ClpB1	-1.69186	0.0423062
BnaA01g05970D	Probable LRR receptor-like serine/threonine-protein kinase At4g31250	-1.69255	0.0163719
BnaA09g55360D	Transcription factor PAR2	-1.70158	0.0187274
BnaA06g23210D	NAC domain containing protein 103	-1.71075	0.0352293
BnaA08g15460D	GTP-binding protein SAR1A	-1.7165	0.0273308
BnaC08g25690D	LOW QUALITY PROTEIN: monothiol glutaredoxin-S14, chloroplastic	-1.71927	0.040858
BnaC08g00060D	Protein RALF-like 1	-1.7315	0.0004223
BnaCnng71320D	cysteine-rich and transmembrane domain-containing protein a-like	-1.73434	0.00700805
BnaA03g00370D	Got1/Sft2-like vescicle transport protein family	-1.73575	0.0431016
BnaC08g43820D	Auxin-responsive protein IAA3	-1.7486	0.000353193
BnaA03g26270D	#N/A	-1.75462	0.0481668
BnaC03g33660D	RmlC-like cupins superfamily protein	-1.75514	0.00487408
BnaA02g34980D	#N/A	-1.75743	0.0125273
BnaA09g50600D	Auxin-responsive protein IAA3	-1.75844	0.000591525
BnaC04g18280D	Heat shock 70 kDa protein 18	-1.75948	0.0455991
BnaCnng78620D	Expansin-like A2	-1.76	0.0132227
BnaC07g29050D	Ethylene-responsive transcription factor TINY	-1.76976	0.00148625
BnaC01g36820D	#N/A	-1.77087	0.0453725
BnaC07g14330D	#N/A	-1.77405	0.0275772
BnaA05g29350D	DnaJ protein ERDJ3A	-1.7786	0.0171431
BnaCnng06680D	secretion-associated RAS super family 1	-1.77985	0.0246803
BnaC03g01590D	Transcription factor bHLH101	-1.78059	0.00960448
BnaA07g17030D	fatty acid reductase 6	-1.7905	0.0412431
BnaAnng36540D	Auxin-responsive protein SAUR21	-1.79371	0.0211488
BnaC05g10460D	RING/U-box superfamily protein	-1.80344	5.26054e-05
BnaA09g32460D	ARM repeat superfamily protein	-1.80569	0.0128544
BnaC03g61750D	GTP-binding protein SAR1A	-1.80595	0.00256731
BnaCnng34610D	histone deacetylase HDT2-like	-1.81166	0.0169841
BnaC03g26380D	#N/A	-1.81245	0.00971014
BnaA08g26550D	secretion-associated RAS super family 1	-1.81956	0.0288885
BnaCnng78690D	Protein NRT1/ PTR FAMILY 7.2	-1.82989	0.049265
BnaAnng10910D	ATPase 2, plasma membrane-type	-1.83653	0.0456128
BnaA06g15250D	L-type lectin-domain containing receptor kinase I.7-like	-1.83744	0.0371457
BnaC08g42510D	histidine acid phosphatase family protein	-1.84658	0.0304835
BnaC01g35570D	NAI2-like protein	-1.86092	0.0409169
BnaA03g25760D	Xyloglucan endotransglucosylase/hydrolase protein 9	-1.8631	0.000148206
BnaC02g17140D	Ribulose bisphosphate carboxylase small chain 1A, chloroplastic	-1.86644	0.00827101
BnaC07g13480D	Putative methyltransferase At1g22800	-1.86958	0.048812
BnaA01g00960D	GTP-binding protein SAR1A	-1.88152	0.00487429
BnaC02g37030D	Oleosin 20.3 kDa	-1.88768	0.00473659
BnaC03g73080D	Xyloglucan endotransglucosylase/hydrolase protein 9	-1.89748	7.99535e-05
BnaC05g49310D	cytochrome P450, family 87, subfamily A, polypeptide 2	-1.90063	0.0395654
BnaA05g00520D	Tetratricopeptide repeat (TPR)-like superfamily protein	-1.90335	4.25099e-06
BnaC04g23060D	Probable fructokinase-4	-1.91418	0.0451996
BnaA02g12810D	Ribulose bisphosphate carboxylase small chain 1A, chloroplastic	-1.9146	0.00555149
BnaC03g26940D	Heat stress transcription factor A-2	-1.91536	0.0129877
BnaC08g35760D	Coatomer subunit alpha-1	-1.924	0.0383855
BnaC05g33040D	formin-like protein 18	-1.92974	3.29243e-06
BnaAnng28960D	Ethylene-responsive transcription factor ERF012	-1.94865	0.00138276
BnaA03g48890D	Protein BOBBER 2	-1.94881	2.56218e-06
BnaC08g17330D	SAUR-like auxin-responsive protein family	-1.95012	0.0112114
BnaA02g26300D	F-box protein At2g02240	-1.95361	0.00193828
BnaC08g19840D	L-type lectin-domain containing receptor kinase I.7-like	-1.95612	0.00808314
BnaCnng27280D	SAUR-like auxin-responsive protein family	-1.96525	0.00946189
BnaA10g11500D	Xyloglucan endotransglucosylase/hydrolase protein 22	-1.97439	6.37631e-05
BnaC06g43160D	DnaJ protein ERDJ3B	-1.98634	0.0051939
BnaCnng16590D	Calcium-binding protein PBP1	-1.98813	0.000166179
BnaC08g35170D	Disease resistance protein (CC-NBS-LRR class) family	-1.99152	0.000244366
BnaCnng49610D	#N/A	-1.99481	0.0274296
BnaAnng19710D	Protein kinase superfamily protein	-2.00196	0.0279508
BnaC06g10150D	chorion class high-cysteine HCB protein 13-like	-2.0475	0.0199313
BnaA05g33660D	Protein LYK2	-2.04878	0.000223455
BnaA03g10120D	#N/A	-2.05021	0.0111592
BnaC05g49640D	Peroxidase 4	-2.05405	0.00845453
BnaC07g17030D	Squamosa promoter-binding-like protein 2	-2.06447	4.0937e-06
BnaA02g35250D	Xyloglucan endotransglucosylase/hydrolase protein 22	-2.06541	5.95379e-06
BnaA03g41540D	Heat stress transcription factor A-7a	-2.0677	0.0169161
BnaA01g11510D	Protein NRT1/ PTR FAMILY 7.2	-2.07532	0.0195115
BnaC06g29970D	Adenine nucleotide alpha hydrolases-like superfamily protein	-2.07598	0.00567855
BnaA06g22030D	Probable inactive poly	-2.0964	0.00240955
BnaA07g27170D	#N/A	-2.09977	0.000297252
BnaC06g37630D	Sm-like protein LSM3B	-2.10471	0.0166899
BnaC02g11480D	Xyloglucan endotransglucosylase/hydrolase protein 22	-2.10792	9.71985e-05
BnaC03g65720D	Probable alkaline/neutral invertase B	-2.11302	0.00237658
BnaC03g78270D	17.4 kDa class III heat shock protein-like	-2.11347	4.12658e-06
BnaC07g11830D	Nitrile-specifier protein 1	-2.11748	0.000580188
BnaA02g12820D	abscisic acid (aba)-deficient 4	-2.11866	4.21925e-05
BnaC08g38360D	#N/A	-2.13324	0.00705334
BnaA01g25950D	formin-like protein 18	-2.13582	3.80127e-07
BnaC01g33150D	formin-like protein 18	-2.13729	1.26356e-08
BnaA05g32650D	(Z)-3-hexen-1-ol acetyltransferase	-2.1519	0.0125273
BnaC03g30100D	#N/A	-2.15632	3.34269e-07
BnaA03g55570D	Cytosolic sulfotransferase 14	-2.15655	0.0112687
BnaA04g11850D	TPX2 (targeting protein for Xklp2) protein family	-2.16076	0.00837921
BnaC09g23900D	Fructose-1,6-bisphosphatase, chloroplastic	-2.16442	0.000247935
BnaC06g09610D	Regulator of Vps4 activity in the MVB pathway protein	-2.16603	0.000746042
BnaC05g49410D	major latex allergen Hev b 5-like	-2.17621	0.010388
BnaA08g03110D	#N/A	-2.17939	0.00338653
BnaC02g12690D	Heat shock protein 90-4	-2.18398	0.000883052
BnaC04g24790D	Heavy metal transport/detoxification superfamily protein	-2.22567	0.00538035
BnaA05g17890D	Wound-responsive family protein	-2.26617	0.000394349
BnaC05g24840D	LOW QUALITY PROTEIN: probable BOI-related E3 ubiquitin-protein ligase 3	-2.26918	0.00028459
BnaA05g31370D	Prefoldin	-2.27518	0.000361344
BnaA08g00950D	17.4 kDa class III heat shock protein-like	-2.27566	3.734e-06
BnaC02g15470D	Pyridoxal phosphate (PLP)-dependent transferases superfamily protein	-2.29827	4.21925e-05
BnaC02g47880D	F-box protein At2g02240	-2.3009	1.73831e-05
BnaA05g36810D	formin-like protein 18	-2.31275	7.05332e-09
BnaC07g42400D	ATPase 2, plasma membrane-type	-2.31789	0.00209725
BnaA02g10970D	Low-temperature-induced 65 kDa protein	-2.34206	0.000578246
BnaC09g32750D	Xyloglucan endotransglucosylase/hydrolase protein 22	-2.34707	1.88068e-06
BnaA07g11000D	l-type lectin-domain containing receptor kinase -like	-2.35916	0.000273993
BnaC02g13060D	putative lipid-transfer protein DIR1	-2.40312	2.48666e-05
BnaA06g38670D	myb domain protein 45	-2.41146	0.00105484
BnaC09g50850D	Ethylene-responsive transcription factor TINY	-2.42625	1.00083e-05
BnaCnng11710D	Polynucleotidyl transferase, ribonuclease H fold protein with HRDC domain	-2.42969	0.000573669
BnaC02g12680D	Heat shock protein 90-2	-2.43019	3.96772e-07
BnaC04g22680D	Mitogen-activated protein kinase 10	-2.4706	7.71229e-06
BnaC06g38910D	Gibberellin 2-beta-dioxygenase 1	-2.47853	0.00201679
BnaCnng54420D	FAD-binding Berberine family protein	-2.48141	0.000283304
BnaCnng54110D	Heat stress transcription factor B-2a	-2.49296	1.35154e-05
BnaC03g28310D	Protein EXORDIUM	-2.49721	4.03042e-08
BnaC09g28670D	40S ribosomal protein S10-3	-2.51777	0.00107047
BnaA03g23810D	Protein EXORDIUM	-2.54955	5.28207e-08
BnaA09g42690D	Disease resistance protein (CC-NBS-LRR class) family	-2.6021	0.000120323
BnaC07g14340D	l-type lectin-domain containing receptor kinase -like	-2.60861	3.17166e-07
BnaC08g31330D	U-box domain-containing protein 36	-2.61537	9.45151e-07
BnaAnng09500D	Protein LURP-one-related 10	-2.61762	3.18576e-06
BnaC02g15270D	Low-temperature-induced 65 kDa protein	-2.62166	5.7411e-05
BnaC04g21500D	Ulp1 protease family protein	-2.63058	0.00036002
BnaA09g04470D	Ethylene-responsive transcription factor TINY	-2.64204	2.12698e-05
BnaA01g06620D	Tetraspanin-9	-2.64335	2.21711e-08
BnaC09g11650D	Cytosolic sulfotransferase 3	-2.71165	3.80127e-07
BnaC07g43730D	Auxin-responsive protein IAA29	-2.7623	2.74109e-05
BnaA02g11150D	Pyridoxal phosphate (PLP)-dependent transferases superfamily protein	-2.82538	6.31463e-07
BnaC06g38250D	Ethylene-responsive transcription factor ERF013	-2.86133	1.24559e-05
BnaC08g12570D	#N/A	-2.90256	5.54822e-07
BnaC04g36210D	Putative B3 domain-containing protein REM15	-2.90915	1.82398e-05
BnaC04g28450D	Heat stress transcription factor A-7a	-3.02669	1.7692e-06
BnaA10g29070D	Probable xyloglucan endotransglucosylase/hydrolase protein 12	-3.02801	1.41772e-06
BnaA02g07900D	temperature-induced lipocalin	-3.09397	5.02274e-13
BnaCnng48340D	#N/A	-3.41689	1.62999e-10
BnaA07g33640D	Ethylene-responsive transcription factor ERF013	-3.48036	7.05921e-11

## Sheet: Incomp vs com_UP_regulated_DEGs
Up-regulated DEGs identified by comparing 'Incomp' versus 'Comp'.
Gene_ID	Annotation	Log2_fold_change	padj
BnaC05g14950D	Pathogenesis-related thaumatin superfamily protein	4.981	2.13858e-22
BnaA05g03200D	Eukaryotic aspartyl protease family protein	4.85162	7.3773e-17
BnaA02g06090D	Serine carboxypeptidase-like 47	4.51626	7.88493e-15
BnaA10g24230D	Peroxidase 54	4.35962	3.63377e-25
BnaA09g00450D	Probable glycerol-3-phosphate acyltransferase 3	4.33397	1.01101e-13
BnaC01g09550D	Phosphorylase superfamily protein	4.15482	8.43358e-23
BnaA09g15610D	Late embryogenesis abundant (LEA) protein-related	4.09575	7.50833e-18
BnaA07g09830D	Beta carbonic anhydrase 3	4.08287	1.91698e-10
BnaC06g28130D	Protein kinase superfamily protein	4.07321	1.21368e-10
BnaA05g26640D	Basic endochitinase B	4.01333	4.25601e-31
BnaA07g20550D	VQ motif-containing protein 10	3.93712	9.14733e-20
BnaA04g25210D	receptor serine/threonine kinase, putative	3.89125	2.92168e-13
BnaA04g18870D	receptor like protein 24	3.86897	5.22059e-17
BnaC08g35300D	cysteine-rich RLK (RECEPTOR-like protein kinase) 15	3.81783	4.73074e-12
BnaC07g26970D	flowering-promoting factor 1-like protein 1	3.81764	4.09239e-09
BnaC09g09800D	Cytochrome P450 71B2	3.79707	1.05523e-09
BnaA03g20310D	Chitinase family protein	3.77651	3.02571e-15
BnaA06g10230D	ABC transporter G family member 40	3.75173	9.58447e-10
BnaC01g41330D	Nucleotide-diphospho-sugar transferase, predicted	3.71102	6.90354e-13
BnaC04g03770D	Beta-glucosidase 32	3.70946	1.78404e-09
BnaAnng35430D	Cellulose synthase-like protein G2	3.68513	1.19443e-10
BnaC02g09170D	Peroxidase 58	3.62349	2.30224e-15
BnaC02g09180D	Peroxidase 58	3.62058	4.00392e-36
BnaC04g47920D	cytochrome p450 79c2	3.60299	1.15611e-09
BnaC03g33890D	pathogenesis-related protein	3.59393	6.20567e-12
BnaA02g21660D	osmotin-like protein OSM34	3.56975	1.75759e-10
BnaA09g28450D	myb domain protein 116	3.56456	1.53496e-14
BnaC03g74050D	Adenosylhomocysteinase 2	3.50706	1.06294e-30
BnaC05g40680D	Basic endochitinase B	3.50308	5.36627e-29
BnaC04g15320D	Glutamate receptor 2.8	3.49335	1.76313e-07
BnaC08g43470D	LOB domain-containing protein 1	3.4804	1.52143e-10
BnaA03g01790D	cytochrome P450 71A1-like	3.47002	2.534e-09
BnaC03g72480D	Short-chain dehydrogenase reductase 3a	3.46633	2.13858e-22
BnaA03g21640D	Short-chain dehydrogenase reductase 3a	3.44342	1.80435e-19
BnaA04g07850D	NDR1/HIN1-like 25	3.41388	6.50047e-08
BnaC06g20410D	VQ motif-containing protein 10	3.39317	8.18921e-13
BnaC04g53030D	chitinase, putative	3.39295	3.75801e-10
BnaC05g03090D	receptor like protein 54	3.36891	4.43881e-08
BnaA07g17230D	beta-1,3-glucanase 3	3.35571	4.98975e-12
BnaC05g11890D	ABC transporter G family member 40	3.32882	2.18167e-08
BnaC09g48850D	Peroxidase 54	3.31264	1.73064e-15
BnaC05g09070D	Cytochrome P450 71B7	3.31149	6.44993e-15
BnaA02g04550D	Peroxidase 58	3.28115	1.12772e-06
BnaC04g03790D	Beta-glucosidase 27	3.26871	1.58628e-07
BnaA06g13410D	Pathogenesis-related thaumatin superfamily protein	3.26501	3.47103e-09
BnaC06g37480D	Calcium-binding protein CML39	3.25286	1.04321e-08
BnaA01g07970D	Phosphorylase superfamily protein	3.19743	1.93898e-12
BnaC01g21080D	Lactate/malate dehydrogenase family protein	3.19654	4.74056e-13
BnaA09g55490D	Beta-glucosidase 27	3.19495	5.74967e-14
BnaC07g37810D	MATE efflux family protein	3.19445	4.07206e-07
BnaCnng49630D	Cytochrome P450 71B2	3.17288	9.40078e-09
BnaA06g07620D	Cytochrome P450 71B7	3.13524	5.29246e-10
BnaC02g13050D	putative lipid-transfer protein DIR1	3.12405	4.09426e-09
BnaA02g35760D	Glutathione S-transferase U12	3.12147	1.05523e-09
BnaA03g04160D	Probable WRKY transcription factor 75	3.1151	6.15198e-16
BnaC03g33900D	Hevein-like preproprotein	3.10879	4.73074e-12
BnaA02g37030D	Squalene epoxidase 5	3.09889	5.93234e-08
BnaA03g20300D	Chitinase family protein	3.09175	2.60307e-09
BnaA09g18570D	Encodes a protein whose expression is responsive to nematode infection.	3.07554	1.04321e-08
BnaC03g24290D	Chitinase family protein	3.06333	3.00629e-06
BnaA01g01200D	Sec14p-like phosphatidylinositol transfer family protein	3.04859	4.13831e-07
BnaC05g14970D	Pathogenesis-related thaumatin superfamily protein	3.04794	4.13831e-07
BnaC04g49080D	receptor serine/threonine kinase, putative	3.02308	4.1306e-11
BnaC06g22120D	Defensin-like protein 17	3.01797	9.51955e-08
BnaC09g16220D	Late embryogenesis abundant (LEA) protein-related	3.00931	1.65191e-11
BnaA07g21130D	extensin-like	3.00638	2.55386e-05
BnaA06g36650D	glu S.griseus protease inhibitor-like	3.00516	1.43544e-07
BnaA04g04370D	PAR1 protein	3.00162	2.54326e-07
BnaA09g36610D	Glucan endo-1,3-beta-glucosidase, acidic isoform	2.99965	2.30759e-08
BnaA05g20940D	NEP-interacting protein 1	2.99147	2.87625e-09
BnaC09g07880D	UDP-glycosyltransferase 72E3	2.97675	2.54334e-07
BnaA03g28770D	pathogenesis-related protein	2.96816	3.40348e-07
BnaA05g36270D	UDP-glycosyltransferase 82A1	2.9519	6.76991e-05
BnaC04g38140D	receptor like protein 32	2.94469	1.08747e-06
BnaC01g26050D	Cysteine proteinases superfamily protein	2.94371	1.52143e-10
BnaA07g30710D	kunitz trypsin inhibitor 1	2.92815	3.09203e-08
BnaA01g34540D	alpha/beta-Hydrolases superfamily protein	2.92334	2.16357e-06
BnaA09g00460D	#N/A	2.92265	8.10637e-05
BnaA06g21000D	Cysteine proteinases superfamily protein	2.91877	8.45799e-05
BnaC07g17210D	glu S.griseus protease inhibitor-like	2.9148	3.17069e-05
BnaA09g22480D	2-oxoglutarate (2OG) and Fe(II)-dependent oxygenase superfamily protein	2.90233	3.89127e-05
BnaC09g48830D	Probable L-type lectin-domain containing receptor kinase S.5	2.89672	2.98588e-08
BnaA05g03420D	chitinase, putative	2.88889	3.34591e-07
BnaA01g03020D	UDP-glycosyltransferase 73B3	2.88691	0.000122761
BnaA05g31800D	Sugar transporter ERD6-like 12	2.88647	0.000115651
BnaC04g22420D	Beta-glucosidase 27	2.87453	9.42406e-09
BnaC06g03190D	root hair specific 6	2.87192	9.33151e-05
BnaA06g33710D	Glycosyltransferase family 61 protein	2.86325	5.57528e-07
BnaC09g47880D	Peptide methionine sulfoxide reductase A2	2.86231	4.15054e-05
BnaA03g46460D	Metal-nicotianamine transporter YSL1	2.85429	4.78735e-08
BnaA09g15810D	Cytosolic sulfotransferase 11	2.8521	7.55222e-07
BnaA06g16030D	proline-rich family protein	2.84238	0.000147146
BnaC02g41390D	Squalene epoxidase 5	2.84142	1.56211e-07
BnaC04g25200D	jasmonate-regulated gene 21	2.82841	7.06887e-07
BnaC06g13220D	Lysine histidine transporter 1	2.82419	7.88493e-15
BnaC04g01860D	#N/A	2.82219	4.53556e-05
BnaC02g42660D	Pyruvate kinase family protein	2.82191	6.21201e-19
BnaC03g73510D	plant U-box 24	2.8091	0.000185755
BnaA09g00420D	UDP-D-xylose\x3aL-fucose alpha-1,3-D-xylosyltransferase 1	2.80718	2.79334e-09
BnaA08g24120D	fucosyltransferase 6	2.80119	2.20317e-06
BnaA07g22750D	kunitz trypsin inhibitor 1	2.80044	7.63788e-17
BnaA01g34980D	Glycosyl hydrolase family protein with chitinase insertion domain	2.79803	3.34681e-21
BnaC03g49940D	Aldolase-type TIM barrel family protein	2.79574	8.0282e-13
BnaC02g45000D	Actin-depolymerizing factor 12	2.79453	2.03445e-10
BnaC04g52860D	Eukaryotic aspartyl protease family protein	2.78198	4.88402e-06
BnaA08g00970D	GDSL esterase/lipase 3	2.7778	3.75801e-10
BnaA08g28160D	receptor like protein 54	2.76917	1.62167e-05
BnaA10g23450D	protein LURP-one-related 10-like	2.76897	1.06765e-13
BnaC05g00530D	1-aminocyclopropane-1-carboxylate synthase 2	2.7662	2.18167e-08
BnaC06g23700D	kunitz trypsin inhibitor 1	2.76188	1.48671e-12
BnaA02g11580D	Probable LRR receptor-like serine/threonine-protein kinase At1g74360	2.75092	3.80659e-05
BnaC01g15520D	Cation/H(+) antiporter 17	2.7489	1.76571e-07
BnaAnng35320D	Glutamate receptor 2.8	2.74716	6.47077e-05
BnaA09g54080D	Probable WRKY transcription factor 65	2.74577	7.81694e-13
BnaA09g49180D	LOB domain-containing protein 1	2.7435	3.34681e-21
BnaC01g14790D	Cysteine-rich receptor-like protein kinase 21	2.74	3.35579e-05
BnaA03g31980D	plant U-box 24	2.7322	0.00038644
BnaC01g04250D	UDP-glycosyltransferase 73B3	2.72712	1.76571e-07
BnaC05g14820D	Probable carboxylesterase 1	2.72706	3.48228e-16
BnaCnng33720D	probable polyamine oxidase 5	2.72634	1.35358e-06
BnaCnng07500D	beta-1,3-glucanase 3	2.71809	3.93961e-07
BnaC05g12280D	Wall-associated receptor kinase-like 6	2.71716	2.76451e-05
BnaA06g20910D	alpha/beta-Hydrolases superfamily protein	2.71282	0.000205185
BnaC05g37420D	Probable lipid desaturase ADS3.2, chloroplastic	2.70737	2.32521e-05
BnaA10g07090D	G-type lectin S-receptor-like serine/threonine-protein kinase At1g11330	2.70314	3.77632e-05
BnaC03g05760D	Probable WRKY transcription factor 75	2.70192	3.00383e-14
BnaA05g33880D	Alpha-dioxygenase 1	2.69837	1.12346e-09
BnaC09g47670D	Serine carboxypeptidase-like 35	2.68865	7.30419e-05
BnaA08g24260D	#N/A	2.67631	7.39466e-05
BnaA02g10950D	Actin-depolymerizing factor 12	2.6749	4.8313e-08
BnaC03g52730D	Mitochondrial phosphate carrier protein 2, mitochondrial	2.6716	5.62194e-12
BnaAnng05060D	cysteine-rich and transmembrane domain-containing protein a-like	2.66985	0.000178879
BnaCnng33000D	1-aminocyclopropane-1-carboxylate oxidase 1	2.66693	1.42814e-05
BnaA08g02780D	dehydration-responsive protein rd22-like	2.65816	8.43607e-09
BnaCnng41750D	Alpha-barbatene synthase	2.64885	2.45827e-07
BnaA05g02090D	#N/A	2.64838	5.19246e-05
BnaA07g11060D	O-methyltransferase family protein	2.64758	1.98002e-07
BnaA06g15800D	response to low sulfur 1	2.64436	6.75482e-08
BnaC08g24260D	UDP-glycosyltransferase 73C7	2.63497	0.000629644
BnaA08g26320D	myb domain protein 61	2.62293	6.16018e-06
BnaA02g35970D	Isoflavone reductase homolog P3	2.61821	2.47715e-09
BnaA03g38680D	receptor like protein 33	2.61002	0.000553807
BnaAnng38800D	UDP-glycosyltransferase 82A1	2.60677	0.000229397
BnaA06g31400D	P-loop containing nucleoside triphosphate hydrolases superfamily protein	2.59499	0.000819506
BnaA05g30040D	Cytochrome b561 and DOMON domain-containing protein At3g07570	2.59131	4.58175e-09
BnaC04g03120D	UDP-glycosyltransferase 74F1	2.59103	5.19853e-05
BnaA09g39060D	Arabidopsis thaliana protein of unknown function (DUF821)	2.58976	0.000146081
BnaC07g38730D	Metal-nicotianamine transporter YSL1	2.58625	2.62305e-07
BnaC04g03720D	ATP sulfurylase 2	2.57823	1.10796e-05
BnaA05g12930D	NDR1/HIN1-like 25	2.56799	1.53376e-08
BnaC09g47660D	Serine carboxypeptidase-like 35	2.56389	1.66786e-06
BnaA07g31330D	receptor like protein 15	2.55683	0.000106979
BnaCnng08040D	Isoflavone reductase homolog P3	2.55615	6.15198e-16
BnaA01g01190D	Sec14p-like phosphatidylinositol transfer family protein	2.55392	0.000146081
BnaC01g44930D	plant U-box 24	2.54406	0.00141181
BnaC08g28310D	Glycosyltransferase family 61 protein	2.54312	6.34779e-06
BnaC06g31040D	Glutathione S-transferase U11	2.53834	9.07263e-12
BnaA10g20210D	Probable WRKY transcription factor 75	2.53821	1.01282e-05
BnaC09g48120D	protein LURP-one-related 10-like	2.53315	6.78674e-10
BnaC08g19690D	O-methyltransferase family protein	2.52276	1.95406e-07
BnaA07g23960D	matrix metalloproteinase	2.52228	4.93365e-05
BnaC04g45010D	Protein YLS9	2.52068	5.52236e-15
BnaA09g02980D	Glutamate receptor 1.2	2.50819	1.96222e-05
BnaA07g36940D	myb domain protein 116	2.50564	1.05513e-06
BnaC04g31950D	#N/A	2.50547	0.00202441
BnaA06g13430D	Pathogenesis-related thaumatin superfamily protein	2.50454	0.00035181
BnaCnng39570D	fucosyltransferase 6	2.50146	0.000189463
BnaC07g38110D	Cysteine-rich receptor-like protein kinase 11	2.50044	1.10796e-05
BnaA07g23490D	Nuclear transport factor 2 (NTF2) family protein	2.49341	2.82353e-08
BnaC07g25860D	Phenolic glucoside malonyltransferase 2	2.49216	9.07263e-12
BnaC04g04080D	Probable pectinesterase/pectinesterase inhibitor 17	2.48861	7.0933e-05
BnaC08g28170D	Glucan endo-1,3-beta-glucosidase, acidic isoform	2.48441	0.000146081
BnaC05g20360D	FAD-binding Berberine family protein	2.47412	2.60153e-08
BnaA09g44200D	Putative wall-associated receptor kinase-like 11	2.46919	2.5955e-05
BnaCnng21280D	receptor-like protein kinase 1	2.46732	4.61748e-05
BnaC01g36040D	NAC domain-containing protein 55	2.45854	5.13907e-06
BnaC03g45280D	Aminotransferase ALD1	2.45738	5.67568e-06
BnaC05g01680D	Putative clathrin assembly protein At1g03050	2.44629	0.000470098
BnaA04g25220D	Chitinase family protein	2.43344	5.22646e-09
BnaA01g12970D	cysteine-rich RLK (RECEPTOR-like protein kinase) 16	2.42426	0.000334695
BnaC07g27590D	Probable WRKY transcription factor 33	2.4242	1.25972e-07
BnaA06g15780D	response to low sulfur 3	2.42307	9.72746e-05
BnaC07g38100D	Cysteine-rich receptor-like protein kinase 21	2.4206	9.56786e-05
BnaC09g02400D	Glutamate receptor 1.2	2.41328	0.00170994
BnaC03g25220D	Probable pectinesterase/pectinesterase inhibitor 17	2.41041	6.88826e-08
BnaA01g28930D	NAC domain-containing protein 55	2.39834	9.58096e-05
BnaCnng62240D	cytochrome P450, family 71, subfamily A, polypeptide 27	2.39619	7.58497e-05
BnaA03g21150D	Probable pectinesterase/pectinesterase inhibitor 17	2.39601	0.000438785
BnaC04g03990D	Expansin-B4	2.39064	0.00425301
BnaCnng43090D	S-alkyl-thiohydroximate lyase SUR1	2.38191	2.33625e-13
BnaCnng01270D	UDP-D-xylose\x3aL-fucose alpha-1,3-D-xylosyltransferase 1	2.38063	1.89231e-12
BnaC03g63920D	Reticuline oxidase-like protein	2.38006	8.90093e-09
BnaC01g14830D	cysteine-rich RLK (RECEPTOR-like protein kinase) 16	2.37731	0.00387059
BnaA03g58280D	Putative ALA-interacting subunit 2	2.37514	0.00432157
BnaA07g07350D	alpha/beta-Hydrolases superfamily protein	2.37078	1.25372e-05
BnaC09g01070D	Subtilisin-like protease SBT1.7	2.36558	5.18673e-13
BnaA03g21140D	Probable pectinesterase/pectinesterase inhibitor 17	2.36547	3.70802e-05
BnaA05g07610D	UDP-glycosyltransferase 73C4	2.36544	0.00154868
BnaA07g37560D	Probable S-adenosylmethionine-dependent methyltransferase At5g38100	2.36528	1.27707e-10
BnaC03g22830D	WRKY transcription factor 55	2.36089	2.47872e-05
BnaC03g25230D	Probable pectinesterase/pectinesterase inhibitor 17	2.36056	6.84634e-06
BnaA04g06980D	Putative cysteine-rich receptor-like protein kinase 23	2.35107	8.81655e-09
BnaC03g28940D	Sodium transporter HKT1	2.34857	6.89704e-06
BnaA05g23670D	Probable lipid desaturase ADS3.2, chloroplastic	2.34347	1.96823e-05
BnaA07g36950D	L-arabinokinase	2.34294	2.87625e-09
BnaC01g34170D	Lon protease homolog 1, mitochondrial	2.34227	0.00521072
BnaC09g24420D	2-oxoglutarate (2OG) and Fe(II)-dependent oxygenase superfamily protein	2.33893	0.00243109
BnaA04g13760D	Methylesterase 4	2.33833	4.62526e-10
BnaC04g36030D	Methylesterase 4	2.33527	8.18921e-13
BnaCnng77080D	Probable flavin-containing monooxygenase 1	2.33413	3.90718e-05
BnaA02g35770D	Glutathione S-transferase U11	2.32979	0.000205185
BnaCnng07930D	Rieske (2Fe-2S) domain-containing protein	2.32528	7.21274e-08
BnaC03g72470D	Short-chain dehydrogenase reductase 3c	2.32458	0.00664182
BnaA05g36230D	Cysteine-rich repeat secretory protein 38	2.31527	2.18655e-06
BnaC08g26030D	exocyst subunit exo70 family protein H1	2.31309	2.88689e-05
BnaC06g12270D	Probable S-adenosylmethionine-dependent methyltransferase At5g38100	2.30536	6.59715e-08
BnaC04g54530D	Glutathione S-transferase U1	2.29935	0.00686523
BnaC09g24440D	2-oxoglutarate (2OG) and Fe(II)-dependent oxygenase superfamily protein	2.29396	0.00618486
BnaA05g34360D	GDSL esterase/lipase At2g42990	2.29264	0.00771093
BnaA05g04050D	Beta-glucosidase 32	2.29055	0.00643464
BnaA03g19180D	WRKY transcription factor 55	2.28957	0.000518225
BnaC08g01200D	receptor like protein 54	2.28775	0.000572323
BnaC01g31930D	DUF679 domain membrane protein 1	2.28724	0.00535686
BnaC07g36050D	E3 ubiquitin-protein ligase BOI	2.27893	7.95872e-06
BnaA07g03510D	S-adenosyl-L-methionine-dependent methyltransferases superfamily protein	2.27476	2.62305e-07
BnaA08g21450D	O-methyltransferase family protein	2.27472	7.08491e-06
BnaA05g25210D	GDSL esterase/lipase 1-like	2.27435	0.00251975
BnaAnng30810D	Transcription factor MYB51	2.27358	0.000205462
BnaA01g13360D	Cation/H(+) antiporter 17	2.27275	7.56099e-05
BnaC07g46040D	Cytochrome P450 84A1	2.26899	2.19109e-09
BnaA02g03210D	Probably inactive leucine-rich repeat receptor-like protein kinase At5g48380	2.26809	0.000106071
BnaC07g35670D	Probable xyloglucan endotransglucosylase/hydrolase protein 29	2.2647	1.11595e-08
BnaA08g22130D	Probable flavin-containing monooxygenase 1	2.26395	1.8259e-05
BnaAnng39300D	GDSL esterase/lipase 3	2.25995	4.88315e-05
BnaC05g32780D	BTB/POZ domain-containing protein At5g60050	2.25985	0.00306029
BnaA01g18990D	cytochrome P450, family 71, subfamily A, polypeptide 27	2.25928	5.57464e-05
BnaA01g00110D	Rhamnogalacturonate lyase family protein	2.25882	0.00954797
BnaC03g40070D	Probable cyclic nucleotide-gated ion channel 20, chloroplastic	2.25085	2.15463e-05
BnaC01g01620D	#N/A	2.24959	0.00581457
BnaA07g32020D	Isoflavone reductase homolog P3	2.24897	1.25416e-06
BnaA01g11840D	5&apos;-adenylylsulfate reductase 3, chloroplastic	2.24728	1.86771e-09
BnaAnng09430D	plant U-box 24	2.23838	5.2533e-05
BnaA09g42420D	Rhamnogalacturonate lyase family protein	2.23753	0.0101897
BnaC02g02350D	Peroxidase 52	2.23654	1.48693e-06
BnaC07g49990D	Probable galacturonosyltransferase-like 2	2.23386	3.84316e-06
BnaC05g46390D	Sugar transporter ERD6-like 12	2.2335	8.93093e-05
BnaC05g05560D	LOB domain-containing protein 1	2.23109	1.42814e-05
BnaA06g19110D	Mitochondrial phosphate carrier protein 2, mitochondrial	2.23069	8.45045e-12
BnaCnng06970D	myb domain protein 61	2.22547	1.9869e-05
BnaC09g20500D	Encodes a protein whose expression is responsive to nematode infection.	2.22488	0.000465623
BnaC04g31100D	Proline dehydrogenase 2, mitochondrial	2.22285	0.00289289
BnaA06g04390D	LOB domain-containing protein 1	2.22233	1.76375e-06
BnaA05g13030D	Glutamate receptor 2.8	2.22191	1.72845e-05
BnaA03g31840D	#N/A	2.2204	3.89127e-05
BnaC01g13420D	5&apos;-adenylylsulfate reductase 3, chloroplastic	2.21556	3.96394e-08
BnaC04g26600D	PAR1 protein	2.21038	0.00230437
BnaC04g28590D	Protein DJ-1 homolog A	2.20986	7.48656e-12
BnaA10g23110D	Serine carboxypeptidase-like 35	2.19722	0.000422111
BnaC07g08320D	myb domain protein 15	2.19683	0.000835461
BnaC06g21260D	extensin-like	2.19511	0.000412277
BnaC08g02980D	dehydration-responsive protein rd22-like	2.1878	0.00494608
BnaCnng28450D	Ankyrin repeat family protein	2.18642	0.0111378
BnaC04g51450D	myb domain protein 2	2.18553	0.00474736
BnaA02g05170D	Indole-3-acetaldehyde oxidase	2.18526	0.00262568
BnaC09g17590D	Ethylene-responsive transcription factor ERF096	2.18471	0.0155731
BnaC06g01920D	1,4-dihydroxy-2-naphthoyl-CoA thioesterase 1	2.18242	0.0128618
BnaC04g35560D	Serine/threonine-protein kinase SRK2J	2.18131	2.4493e-06
BnaC08g36740D	Putative wall-associated receptor kinase-like 11	2.17788	0.00459009
BnaC01g00790D	Adenylyl-sulfate kinase 2, chloroplastic	2.17645	1.75363e-09
BnaA02g16690D	Transcription factor MYB51	2.17574	0.00122679
BnaC06g23690D	kunitz trypsin inhibitor 1	2.1727	1.99843e-07
BnaA06g26680D	Probable WRKY transcription factor 30	2.16951	4.82015e-06
BnaA09g45890D	Phosphate transporter PHO1 homolog 3	2.16614	0.000268782
BnaC03g28220D	Peroxidase 37	2.16596	0.0148371
BnaA10g07120D	early nodulin-like protein 1	2.1619	3.37009e-08
BnaA05g08260D	RING-H2 finger protein ATL70-like	2.15634	0.00471359
BnaC02g08080D	Curculin-like (mannose-binding) lectin family protein	2.15525	2.47153e-06
BnaA02g19970D	Lactoylglutathione lyase / glyoxalase I family protein	2.15145	0.000756379
BnaA09g30190D	Heavy metal transport/detoxification superfamily protein	2.15109	0.00210543
BnaC05g44070D	Polygalacturonase QRT2	2.14956	0.0180594
BnaAnng28300D	Lysine histidine transporter 1	2.14877	1.11595e-08
BnaA03g53190D	Late embryogenesis abundant (LEA) hydroxyproline-rich glycoprotein family	2.14653	0.00127711
BnaA06g02050D	Probable LRR receptor-like protein kinase At1g51890	2.14546	0.00324344
BnaA10g01030D	chitinase 10-like	2.13875	0.0167582
BnaC06g09110D	Probable LRR receptor-like serine/threonine-protein kinase At1g51820	2.13713	0.00193279
BnaA09g35360D	Glycosyl hydrolase superfamily protein	2.13252	0.0157843
BnaA03g09460D	1-aminocyclopropane-1-carboxylate oxidase homolog 11	2.13218	9.43768e-08
BnaC04g03540D	nep-interacting protein 1	2.129	0.00038644
BnaAnng12390D	receptor like protein 54	2.12279	0.000300263
BnaC04g22390D	Beta-glucosidase 30	2.1203	0.0221028
BnaA09g47340D	Flavin-containing monooxygenase FMO GS-OX-like 2	2.11927	9.20673e-05
BnaA03g34700D	Probable cyclic nucleotide-gated ion channel 20, chloroplastic	2.11753	0.00327824
BnaCnng25340D	NDR1/HIN1-like 25	2.11729	0.0231064
BnaA10g07080D	G-type lectin S-receptor-like serine/threonine-protein kinase At1g11330	2.11123	0.0177367
BnaA03g50450D	putative F-box/LRR-repeat protein 19	2.10614	0.00262568
BnaA07g27130D	Exostosin family protein	2.10576	0.000530774
BnaAnng23590D	Glucan endo-1,3-beta-glucosidase, acidic isoform	2.10223	0.0236303
BnaC08g42370D	#N/A	2.10064	0.000108998
BnaC08g18680D	Probable flavin-containing monooxygenase 1	2.10048	0.000316587
BnaAnng42000D	Alkaline-phosphatase-like family protein	2.09943	0.00470803
BnaC04g43070D	receptor like protein 39	2.09942	0.000706701
BnaAnng19370D	GNS1/SUR4 membrane protein family	2.09494	3.1359e-06
BnaA05g25490D	Ankyrin repeat family protein	2.09319	0.00453145
BnaAnng12430D	receptor like protein 54	2.0903	0.000978662
BnaAnng07050D	Stress up-regulated Nod 19	2.08801	0.0259003
BnaCnng20160D	glutamate receptor 2.5	2.08775	0.00771093
BnaC06g40990D	stigma-specific STIG1-like protein 3	2.08745	0.00577433
BnaA07g13180D	pseudogene of cysteine protease-related	2.08696	1.12772e-06
BnaA06g38320D	S-adenosyl-L-methionine-dependent methyltransferases superfamily protein	2.08693	0.0190872
BnaA03g32960D	Phox-associated domain\x3bPhox-like\x3bSorting nexin, C-terminal	2.08628	1.9869e-05
BnaA01g34620D	Adenylyl-sulfate kinase 2, chloroplastic	2.08583	1.87992e-07
BnaC07g10840D	myb domain protein 116	2.0841	0.000613369
BnaA09g28890D	FAD-binding Berberine family protein	2.07976	0.00475712
BnaC04g56610D	Peroxidase 22	2.07883	0.000785406
BnaC03g52490D	Cysteine proteinases superfamily protein	2.07815	0.0137887
BnaC02g38400D	Nitrile-specifier protein 5	2.07669	1.33813e-08
BnaA10g24210D	Probable L-type lectin-domain containing receptor kinase S.5	2.07645	0.00269324
BnaC08g21400D	cysteine-rich and transmembrane domain-containing protein a-like	2.074	0.000412277
BnaC02g11750D	cytochrome P450, family 81, subfamily F, polypeptide 2	2.0732	3.62416e-05
BnaA01g17800D	Lactate/malate dehydrogenase family protein	2.07183	1.18934e-06
BnaC06g35790D	GNS1/SUR4 membrane protein family	2.07147	0.000793892
BnaC03g19130D	Fatty acid 2-hydroxylase 1	2.06832	0.0097214
BnaCnng35440D	Glutathione S-transferase U10	2.06773	6.34306e-07
BnaC02g11720D	Ankyrin repeat family protein	2.06661	1.27947e-07
BnaC04g03530D	NEP-interacting protein 1	2.06228	0.00221755
BnaC06g02740D	Cytochrome P450 72A11	2.05931	1.09981e-07
BnaC03g19840D	Protein YLS9	2.05908	1.64897e-05
BnaA05g34370D	Transcription factor JUNGBRUNNEN 1	2.05159	0.00214276
BnaA01g12580D	Protein STAY-GREEN 1, chloroplastic	2.05055	0.0305202
BnaC09g22830D	Probable WRKY transcription factor 42	2.04931	0.026058
BnaC08g48750D	Serpin-Z4	2.04922	0.0196125
BnaA04g05980D	Protein DJ-1 homolog A	2.04826	1.10953e-06
BnaC07g36420D	Reticuline oxidase-like protein	2.04595	1.60352e-08
BnaA03g39380D	UDP-glycosyltransferase 90A1	2.04363	6.57928e-06
BnaA04g16980D	mutator-like transposase	2.04253	0.00581457
BnaA06g15020D	Wall-associated receptor kinase 4	2.04068	0.00023449
BnaC03g30880D	Glutathione S-transferase F3	2.04017	9.43768e-08
BnaAnng35400D	UDP-glycosyltransferase 73C4	2.03947	0.00954797
BnaA07g00460D	S-alkyl-thiohydroximate lyase SUR1	2.03907	1.66877e-08
BnaAnng06130D	Alpha-galactosidase 1	2.03413	1.2477e-05
BnaA03g43160D	Calcineurin B-like protein 1	2.03331	6.59149e-05
BnaA08g29560D	MATE efflux family protein 1	2.02556	7.12022e-09
BnaCnng63370D	GDSL esterase/lipase 3	2.02315	0.000368804
BnaA03g38670D	Adenylyl-sulfate kinase 1, chloroplastic	2.01764	1.47877e-11
BnaC07g17970D	FAD-binding Berberine family protein	2.01576	0.00297505
BnaC07g26470D	Glutamate receptor 1.2	2.01405	0.0047766
BnaC07g46140D	Sec14p-like phosphatidylinositol transfer family protein	2.01273	0.00732078
BnaC03g75990D	Putative F-box/FBD/LRR-repeat protein At1g16940	2.0035	0.0116847
BnaC04g12030D	Glutamate decarboxylase 2	2.0017	0.0260135
BnaA09g20370D	5&apos;-adenylylsulfate reductase 1, chloroplastic	2.00031	2.096e-07
BnaCnng62410D	GDSL esterase/lipase 3	1.99422	0.000735001
BnaA10g23120D	carboxypeptidase	1.99129	0.000134824
BnaAnng10890D	Peroxidase 45	1.98861	0.0152209
BnaC01g36670D	Cytochrome P450 72A15	1.98662	0.0111378
BnaA04g25750D	Beta-glucosidase 27	1.98634	0.000223063
BnaC02g22590D	Protein STRICTOSIDINE SYNTHASE-LIKE 12	1.98561	1.73064e-15
BnaAnng25610D	Indole-3-acetic acid-amido synthetase GH3.6	1.98239	0.00316415
BnaC05g05180D	Protein phosphatase 2C 3	1.97623	0.000544268
BnaC07g38400D	probable aminotransferase TAT4	1.9737	0.00037037
BnaA03g38440D	Aminotransferase ALD1	1.97294	0.00387585
BnaC03g77410D	alpha/beta-Hydrolases superfamily protein	1.97055	0.018736
BnaAnng31430D	AT-rich interactive domain-containing protein 5	1.96954	0.0427003
BnaA03g26140D	Glutathione S-transferase F3	1.96602	1.53628e-12
BnaA06g13260D	Probable carboxylesterase 1	1.96571	0.0444544
BnaA03g40930D	Probable galacturonosyltransferase-like 2	1.96282	2.11869e-08
BnaC04g36020D	Methylesterase 7	1.96177	7.90043e-06
BnaAnng38140D	E3 ubiquitin-protein ligase BOI	1.95532	0.0267012
BnaC02g22630D	Transcription factor MYB122	1.95461	0.000587328
BnaC02g09080D	2-oxoglutarate (2OG) and Fe(II)-dependent oxygenase superfamily protein	1.95455	0.0448586
BnaA02g35160D	Curculin-like (mannose-binding) lectin family protein	1.95428	1.96823e-05
BnaC04g52880D	Transcription factor JUNGBRUNNEN 1	1.95335	0.000113785
BnaA01g10320D	Nucleotide-diphospho-sugar transferase, predicted	1.95126	4.00127e-05
BnaC08g12620D	#N/A	1.94943	0.0126486
BnaC08g50010D	Galactinol synthase 3	1.9434	5.00906e-05
BnaC04g16880D	ARM repeat superfamily protein	1.93429	0.0420417
BnaA04g24790D	Probable pectinesterase/pectinesterase inhibitor 16	1.93152	0.00118984
BnaC03g45490D	receptor like protein 35	1.93099	0.0177367
BnaA06g19830D	Probable L-type lectin-domain containing receptor kinase I.6	1.93051	0.00377568
BnaA06g15030D	Wall-associated receptor kinase 4	1.92887	0.000205462
BnaC07g19090D	Probable WRKY transcription factor 8	1.92726	0.000102143
BnaC09g25420D	Peroxidase 37	1.92659	0.00173362
BnaCnng30140D	Probable pectinesterase/pectinesterase inhibitor 16	1.92058	0.0015905
BnaC04g37740D	receptor like protein 21	1.92047	0.00470803
BnaC06g31030D	Glutathione S-transferase U12	1.91529	1.48671e-12
BnaC03g21960D	Major facilitator superfamily protein	1.91425	0.000240362
BnaA10g12630D	Leucine-rich repeat protein kinase family protein	1.91237	0.0390358
BnaA02g29540D	AIG2-like (avirulence induced gene) family protein	1.90929	0.0335592
BnaC01g41460D	thaumatin-like protein 1	1.90727	2.04287e-06
BnaA04g22000D	Peroxidase 22	1.90598	0.0158687
BnaC08g30360D	Beta-glucosidase 27	1.89698	0.000168913
BnaC01g11820D	UDP-Glycosyltransferase superfamily protein	1.89654	0.00117795
BnaCnng14620D	Putative cysteine-rich receptor-like protein kinase 23	1.89418	1.78909e-05
BnaC07g23400D	Cytochrome P450 71B20	1.89387	0.00109499
BnaAnng28770D	receptor like protein 24	1.8903	0.0010245
BnaC07g30560D	Arabidopsis thaliana protein of unknown function (DUF821)	1.88965	0.000243218
BnaC04g07600D	Protein NRT1/ PTR FAMILY 5.6	1.88619	0.0448917
BnaC07g30300D	Probable WRKY transcription factor 30	1.88537	0.00474962
BnaA06g30780D	Phenolic glucoside malonyltransferase 2	1.87831	1.49981e-06
BnaAnng37580D	Phosphate transporter PHO1 homolog 3	1.87696	1.08108e-05
BnaA03g11690D	Glucose-6-phosphate/phosphate translocator 1, chloroplastic	1.87577	1.82637e-05
BnaCnng11120D	DJ-1 protein homolog E	1.87136	2.54482e-08
BnaC04g19430D	WRKY transcription factor 6	1.87057	0.00157407
BnaA01g22750D	Putative G-type lectin S-receptor-like serine/threonine-protein kinase At1g61610	1.86753	0.0180889
BnaC08g15920D	#N/A	1.86539	0.0167629
BnaAnng05020D	G-box-binding factor 1-like	1.86224	0.0483262
BnaC05g01260D	Polyketide cyclase/dehydrase and lipid transport superfamily protein	1.85464	0.00110745
BnaA09g44230D	Pathogenesis-related thaumatin superfamily protein	1.85324	0.000133369
BnaA09g41170D	Probable aminotransferase TAT3	1.84762	0.0249825
BnaA08g02250D	receptor like protein 37	1.84513	0.0184211
BnaA06g12720D	Cytosolic sulfotransferase 17	1.84444	4.89378e-07
BnaAnng24600D	Putative Delta(7)-sterol-C5(6)-desaturase 2	1.83906	0.000188368
BnaA03g11400D	Glycerophosphodiester phosphodiesterase GDPDL4	1.83845	0.03594
BnaC03g30870D	Glutathione S-transferase F2	1.83816	3.11306e-06
BnaC05g01300D	#N/A	1.83514	0.016473
BnaA03g53700D	Methylesterase 7	1.83157	0.00626339
BnaC03g68480D	receptor like protein 37	1.82898	4.83822e-05
BnaC05g29600D	Putative calcium-transporting ATPase 13, plasma membrane-type	1.8285	0.0016913
BnaC01g31890D	UDP-glycosyltransferase 84A2	1.82733	0.000144993
BnaAnng16130D	receptor like protein 23	1.82556	0.0275914
BnaCnng75490D	Nitrilase 2	1.8243	3.28349e-10
BnaC07g37460D	cytochrome P450, family 706, subfamily A, polypeptide 1	1.82407	0.00563192
BnaA04g26640D	transmembrane protein-related	1.82383	0.000978777
BnaC09g47680D	carboxypeptidase	1.82291	0.00205025
BnaC09g54320D	Probable aquaporin SIP1-2	1.82192	0.0257765
BnaA05g03920D	nep-interacting protein 1	1.82101	0.00391686
BnaCnng03910D	alpha 1,4-glycosyltransferase family protein	1.81797	0.00199185
BnaC04g43020D	myb domain protein 101	1.81793	0.0219138
BnaCnng11830D	Hydroxyproline-rich glycoprotein family protein	1.81536	0.0306269
BnaC06g14860D	C2H2-type zinc finger family protein	1.81395	0.0184211
BnaC07g38010D	Cysteine-rich receptor-like protein kinase 10	1.81394	0.000772533
BnaC02g01150D	Alpha-galactosidase 1	1.81129	0.00401938
BnaAnng37880D	Proline dehydrogenase 2, mitochondrial	1.81128	0.0124488
BnaA04g26130D	Leucine-rich repeat protein kinase family protein	1.8082	0.000306821
BnaA10g05120D	Type I inositol 1,4,5-trisphosphate 5-phosphatase 11	1.80674	0.00229828
BnaC01g26210D	#N/A	1.80526	0.000401885
BnaC04g56910D	Leucine-rich repeat protein kinase family protein	1.80444	5.77892e-06
BnaA06g27970D	Protein kinase family protein with leucine-rich repeat domain	1.80168	0.00286136
BnaC03g15510D	Low-temperature-induced 65 kDa protein	1.79994	0.0118394
BnaA04g17930D	glycine-rich protein 3 short isoform-like	1.79938	0.0442323
BnaA10g06460D	RING/U-box superfamily protein	1.7975	0.000779551
BnaC07g28970D	Protein kinase family protein with leucine-rich repeat domain	1.79681	0.0166908
BnaA06g13250D	Protein TIFY 10A	1.79547	0.015006
BnaA06g31430D	P-loop containing nucleoside triphosphate hydrolases superfamily protein	1.79357	0.00497184
BnaC09g04560D	Probable WRKY transcription factor 30	1.79346	7.12539e-05
BnaC06g10380D	GDSL esterase/lipase 3	1.79322	0.00165342
BnaC04g54390D	#N/A	1.79017	0.041734
BnaA03g58610D	cytochrome P450, family 706, subfamily A, polypeptide 1	1.78845	0.0042868
BnaC03g47500D	LysM domain-containing GPI-anchored protein 2	1.78832	1.47355e-06
BnaC02g08680D	#N/A	1.78816	0.0204259
BnaA09g14900D	Cytosolic sulfotransferase 18	1.78468	3.04361e-10
BnaA03g26130D	Glutathione S-transferase F3	1.78373	1.6128e-07
BnaC06g36030D	Isoflavone reductase homolog P3	1.78275	1.5603e-07
BnaC05g20740D	Transcription factor MYB108	1.78113	0.0104326
BnaA05g07070D	Zinc finger protein ZAT11	1.78071	0.00184439
BnaA02g26140D	Glutamate decarboxylase 4	1.78062	5.16233e-07
BnaC06g17510D	L-type lectin-domain containing receptor kinase V.5	1.77386	0.0371304
BnaA07g11030D	Wall-associated receptor kinase 4	1.77153	0.045956
BnaAnng30680D	response to low sulfur 2	1.77095	0.0166048
BnaA03g13600D	Internal alternative NAD(P)H-ubiquinone oxidoreductase A2, mitochondrial	1.76777	4.15675e-05
BnaA04g01250D	Zinc finger protein ZAT9	1.76613	0.0376476
BnaC02g31270D	LRR receptor-like serine/threonine-protein kinase EFR	1.76088	5.55644e-06
BnaA05g15130D	cryptdin protein-related	1.76028	0.0373086
BnaC04g07880D	Zinc finger protein ZAT11	1.76016	0.03594
BnaCnng33150D	Probable poly(ADP-ribose) glycohydrolase 2	1.75841	0.0328187
BnaA04g03320D	jasmonate-regulated gene 21	1.7539	0.0120505
BnaC01g39770D	Probable glycosyltransferase At3g07620	1.75278	0.00563192
BnaA04g08710D	tryptophan synthase beta type 2	1.75173	6.0249e-05
BnaC07g34450D	Calcineurin B-like protein 1	1.75121	7.30419e-05
BnaA04g26280D	Cytochrome P450 76C2	1.75054	0.00078096
BnaA03g42770D	Matrixin family protein	1.7476	0.00116572
BnaA01g27810D	Purple acid phosphatase 17	1.74668	0.00785427
BnaAnng41590D	FAD-binding Berberine family protein	1.74367	0.00401938
BnaA04g21040D	Protein YLS9	1.74311	0.0270093
BnaC01g21390D	Phospholipase A1-Ibeta2, chloroplastic	1.7411	0.0298051
BnaC07g22260D	Glycosyltransferase family 61 protein	1.73785	0.00386108
BnaC02g22770D	Probable LRR receptor-like serine/threonine-protein kinase At1g74360	1.73679	0.0219138
BnaA03g43870D	Probable xyloglucan endotransglucosylase/hydrolase protein 29	1.73642	0.00066593
BnaCnng06500D	Sugar transporter ERD6	1.73111	0.0364132
BnaA05g11410D	LOB domain-containing protein 14	1.72973	0.0166048
BnaC02g38550D	Glutamate receptor 1.3	1.72899	0.0156382
BnaA04g17560D	Trans-cinnamate 4-monooxygenase	1.72849	0.00198574
BnaA06g35280D	Adenine nucleotide alpha hydrolases-like superfamily protein	1.72765	3.45013e-05
BnaA04g02500D	Glucan endo-1,3-beta-glucosidase, acidic isoform	1.72517	0.0129445
BnaC05g50000D	Inorganic pyrophosphatase 2	1.72179	3.12315e-06
BnaA01g34610D	Tryptophan N-monooxygenase 1	1.72112	2.31556e-05
BnaA07g24020D	Glutathione S-transferase U11	1.72094	6.57928e-06
BnaA09g05000D	Probable WRKY transcription factor 30	1.7204	0.00027534
BnaA09g20010D	cfe protein	1.71965	0.000247048
BnaA09g46230D	#N/A	1.71727	0.0453141
BnaAnng39990D	Flavin-containing monooxygenase FMO GS-OX-like 2	1.70809	0.0318672
BnaA05g23730D	#N/A	1.70686	0.000401885
BnaC07g23430D	Cytochrome P450 71B23	1.70596	0.00720342
BnaA06g26150D	Leucine-rich repeat (LRR) family protein	1.70428	0.000134572
BnaC02g17060D	Protein kinase superfamily protein	1.70365	0.0190671
BnaC07g38080D	kinases\x3bprotein kinases	1.70045	5.93278e-05
BnaC02g13410D	GDSL esterase/lipase At5g55050	1.69664	0.0027997
BnaC01g34960D	Probable cyclic nucleotide-gated ion channel 20, chloroplastic	1.69587	0.0435207
BnaC08g05930D	UDP-glycosyltransferase 85A5	1.69557	0.00113372
BnaC04g21550D	serine protease inhibitor, Kazal-type family protein	1.69437	0.00110144
BnaC04g21800D	U-box domain-containing protein 36	1.69367	0.0254339
BnaA03g37090D	Cyclopropane-fatty-acyl-phospholipid synthase	1.6928	0.0330616
BnaCnng48630D	Protein kinase superfamily protein	1.69202	0.000717343
BnaA05g35970D	Ubiquinol oxidase 3, mitochondrial	1.69175	8.70727e-05
BnaC03g05940D	Sulfate transporter 4.1, chloroplastic	1.68757	0.000152131
BnaC07g07970D	Cyclopropane-fatty-acyl-phospholipid synthase	1.68524	0.00197665
BnaA01g27190D	Cupredoxin superfamily protein	1.67404	0.0236694
BnaA10g24610D	cytochrome P450 71A1-like	1.67196	0.00579801
BnaCnng53280D	UDP-glycosyltransferase 91C1	1.66705	0.000769742
BnaC02g37620D	AIG2-like (avirulence induced gene) family protein	1.66515	0.0272973
BnaA07g14490D	tryptophan synthase beta type 2	1.66473	0.000194276
BnaA03g44340D	Nucleotide-diphospho-sugar transferase, predicted	1.66132	2.96979e-07
BnaA01g10030D	UDP-Glycosyltransferase superfamily protein	1.65952	6.41257e-05
BnaA09g34860D	exocyst subunit exo70 family protein H1	1.65529	0.000859876
BnaA04g27940D	L-type lectin-domain containing receptor kinase IV.3	1.65383	2.5955e-05
BnaC03g23960D	AT-hook motif nuclear-localized protein 16	1.65245	0.000570904
BnaA03g18480D	Major facilitator superfamily protein	1.65067	3.96394e-08
BnaC04g36630D	alpha/beta-Hydrolases superfamily protein	1.64599	0.00413455
BnaCnng39650D	Chitinase family protein	1.64572	0.00849623
BnaCnng34190D	Core-2/I-branching beta-1,6-N-acetylglucosaminyltransferase family protein	1.64286	0.0206038
BnaA02g09030D	putative lipid-transfer protein DIR1 [Brassica napus]	1.64058	0.0177367
BnaC07g14600D	Wall-associated receptor kinase 4	1.64009	0.00493952
BnaA01g02040D	Brefeldin A-inhibited guanine nucleotide-exchange protein 4	1.63949	0.0171665
BnaA01g20950D	Phytosulfokines 3	1.63845	3.4708e-05
BnaC04g41120D	Trans-cinnamate 4-monooxygenase	1.63694	0.00195629
BnaC04g48620D	Transcription factor JUNGBRUNNEN 1	1.63477	0.000128087
BnaC09g52670D	CASP-like protein 4A4	1.63277	0.00436925
BnaUnng03570D	Glycosyl hydrolase family protein with chitinase insertion domain	1.63003	0.00120688
BnaC04g43150D	receptor like protein 22	1.62859	0.0244453
BnaC09g36400D	Probable WRKY transcription factor 38	1.62856	0.00608543
BnaC01g38180D	NAC (No Apical Meristem) domain transcriptional regulator superfamily protein	1.62444	0.00426088
BnaA07g03730D	S-adenosyl-L-methionine-dependent methyltransferases superfamily protein	1.62437	0.00243378
BnaA03g20290D	chitinase, putative	1.62277	0.0312293
BnaC06g05000D	Probable LRR receptor-like serine/threonine-protein kinase At1g51860	1.62168	0.0324828
BnaC03g60820D	Tryptophan N-monooxygenase 1	1.62105	0.000153264
BnaA03g57570D	Adenosylhomocysteinase 2	1.61886	0.000360206
BnaC04g24330D	Glucan endo-1,3-beta-glucosidase, acidic isoform	1.61819	0.017173
BnaC09g22760D	5&apos;-adenylylsulfate reductase 1, chloroplastic	1.61466	2.37958e-05
BnaA07g26110D	Protein kinase family protein	1.61335	0.00747385
BnaC08g13910D	Leucine-rich receptor-like protein kinase family protein	1.60907	0.0121095
BnaC08g37940D	Glutathione S-transferase U24	1.60643	1.96823e-05
BnaCnng60000D	Ubiquinol oxidase 3, mitochondrial	1.60122	0.00613997
BnaA08g22970D	D-3-phosphoglycerate dehydrogenase 2, chloroplastic	1.59824	0.00229527
BnaC03g05810D	4-substituted benzoates-glutamate ligase GH3.12	1.59806	0.0241954
BnaA03g19960D	AT-hook motif nuclear-localized protein 16	1.59777	0.041734
BnaA06g03880D	ABC transporter C family member 4	1.59578	0.0495518
BnaA01g19470D	Protein STRICTOSIDINE SYNTHASE-LIKE 6	1.59309	0.037191
BnaC07g38070D	Putative cysteine-rich receptor-like protein kinase 35	1.58733	0.0201986
BnaC04g50700D	transmembrane protein-related	1.5865	0.00703207
BnaC02g40040D	Calmodulin-binding protein 60 G	1.58054	1.8983e-05
BnaA03g56050D	Protein trichome birefringence-like 16	1.57911	0.042458
BnaA07g32800D	NAD(P)-binding Rossmann-fold superfamily protein	1.57908	0.0295831
BnaC03g41550D	receptor-like protein 12	1.57751	0.0300603
BnaA07g37340D	Extensin-3	1.57624	0.00565627
BnaC04g31250D	Phenolic glucoside malonyltransferase 1	1.57623	0.000204211
BnaCnng70090D	Phenolic glucoside malonyltransferase 1	1.57613	0.00011217
BnaC07g33070D	UDP-glycosyltransferase 75D1	1.57608	2.33112e-12
BnaC01g41020D	Glycosyl hydrolase family protein with chitinase insertion domain	1.57583	8.61753e-05
BnaA06g02990D	Cytochrome P450 72A11	1.57357	3.83587e-05
BnaC05g01080D	Mannan endo-1,4-beta-mannosidase 1	1.57205	0.00368609
BnaC05g03070D	Probable plastidic glucose transporter 1	1.57196	0.0100732
BnaA02g27550D	Phospholipid-transporting ATPase 10	1.56895	0.0196627
BnaCnng64540D	Putative F-box/FBD/LRR-repeat protein At1g16940	1.56637	0.00127543
BnaA03g04310D	Aldolase-type TIM barrel family protein	1.56463	8.78565e-05
BnaC09g44020D	Probable WRKY transcription factor 75	1.56417	1.96823e-05
BnaA03g39390D	Arabidopsis phospholipase-like protein (PEARLI 4) family	1.56339	0.0186833
BnaA04g13420D	Serine/threonine-protein kinase SRK2J	1.56217	0.0417232
BnaC04g05720D	Eukaryotic aspartyl protease family protein	1.56141	5.91347e-07
BnaAnng10050D	FAD-binding Berberine family protein	1.5589	0.0175238
BnaC02g07540D	Cation/calcium exchanger 1	1.55645	0.0167082
BnaC05g06650D	F-box protein PP2-B15	1.54862	0.0221028
BnaA01g12320D	Probable trehalose-phosphate phosphatase G	1.5485	0.00192238
BnaC03g40250D	Glutamine synthetase cytosolic isozyme 1-3	1.54765	2.32254e-08
BnaC01g00800D	Tryptophan N-monooxygenase 1	1.54752	9.16197e-05
BnaC06g04480D	UDP-Glycosyltransferase superfamily protein	1.54506	0.025226
BnaCnng21290D	receptor-like protein kinase 1	1.53918	0.00108381
BnaCnng59310D	FAD-binding Berberine family protein	1.53436	0.00576064
BnaA08g27400D	Eukaryotic aspartyl protease family protein	1.5299	0.00479384
BnaA09g50800D	Monothiol glutaredoxin-S13	1.52972	0.0323462
BnaCnng60140D	cytochrome P450 71A1-like	1.52897	0.0192045
BnaC03g10290D	Sucrose synthase 1	1.52795	0.00167745
BnaA05g25220D	GDSL esterase/lipase 4	1.52263	0.0195182
BnaCnng41630D	S-adenosyl-L-methionine-dependent methyltransferases superfamily protein	1.52126	0.00100243
BnaCnng28690D	Subtilisin-like protease SBT1.7	1.52109	0.00931034
BnaA07g31260D	Cytosolic sulfotransferase 16	1.52034	0.000835461
BnaC07g37060D	5&apos;-adenylylsulfate reductase 3, chloroplastic	1.51593	0.00017594
BnaC03g67380D	WRKY transcription factor 18	1.51564	0.00525773
BnaC06g35090D	receptor like protein 15	1.5153	0.0350009
BnaA03g60000D	(E,E)-geranyllinalool synthase	1.51365	0.0233479
BnaC08g09270D	RING-H2 finger protein ATL56	1.51349	0.00324417
BnaA07g33180D	extensin-like [Brassica napus]	1.51306	0.00113006
BnaA10g30040D	UDP-glycosyltransferase 92A1	1.51298	4.82015e-06
BnaC04g22860D	L-type lectin-domain containing receptor kinase V.5	1.51225	0.0114833
BnaC01g01500D	Cytochrome P450 81F1	1.50284	0.0343478
BnaC01g14860D	Putative cysteine-rich receptor-like protein kinase 23	1.50065	0.0406418
BnaA03g47050D	membrane-anchored ubiquitin-fold protein 3-like	1.49839	0.00462856
BnaCnng24580D	Stress up-regulated Nod 19	1.49782	0.00470803
BnaC01g15870D	Trehalase	1.49474	0.0272108
BnaC05g28300D	UDP-glycosyltransferase 91C1-like	1.49257	0.0261894
BnaA06g36630D	zinc knuckle (CCHC-type) family protein	1.48974	0.00664182
BnaAnng34370D	Probable aldo-keto reductase 6	1.48905	0.00604184
BnaC09g13810D	S-type anion channel SLAH4	1.48747	0.0234013
BnaC01g43340D	Putative G-type lectin S-receptor-like serine/threonine-protein kinase At1g61610	1.48287	0.0085109
BnaC04g05050D	probable dolichyl pyrophosphate Glc1Man9GlcNAc2 alpha-1,3-glucosyltransferase	1.4823	0.00128746
BnaA08g29060D	Protein TRM32	1.4817	0.0459477
BnaCnng01370D	Chitinase family protein	1.48102	0.0120687
BnaC09g49740D	Anthranilate synthase alpha subunit 1, chloroplastic	1.47676	0.0197761
BnaC08g17520D	D-3-phosphoglycerate dehydrogenase 2, chloroplastic	1.4705	9.05687e-06
BnaA07g30280D	Putative receptor-like protein kinase At1g72540	1.46759	0.032285
BnaC06g15520D	Patatin-like protein 7	1.46732	0.0330244
BnaA03g45080D	5&apos;-adenylylsulfate reductase 3, chloroplastic	1.46726	0.00184628
BnaA07g28420D	Actin cross-linking protein	1.46539	0.00717966
BnaA01g20710D	O-acyltransferase (WSD1-like) family protein	1.46512	0.00131132
BnaA10g13110D	L-type lectin-domain containing receptor kinase I.8	1.46498	0.029046
BnaA06g14380D	Prolyl oligopeptidase family protein	1.46355	0.0136978
BnaA03g58300D	Ras-related protein RABA1e	1.46169	0.0332465
BnaA02g12490D	ankyrin repeat family protein	1.46077	0.0346067
BnaC08g14740D	G-type lectin S-receptor-like serine/threonine-protein kinase At1g61360	1.459	0.0325411
BnaA03g44600D	Reticuline oxidase-like protein	1.45897	0.0233974
BnaC01g23420D	Protein STRICTOSIDINE SYNTHASE-LIKE 6	1.4579	0.0099885
BnaA02g34440D	Flotillin-like protein 3	1.45763	0.00156727
BnaAnng39070D	Protein PLANT CADMIUM RESISTANCE 2	1.44826	0.0418913
BnaC08g39950D	Phosphate transporter PHO1 homolog 3	1.44511	0.000635175
BnaC01g01570D	Auxin-responsive GH3 family protein	1.44316	0.0424822
BnaA03g56970D	BON1-associated protein 2	1.44278	0.00551023
BnaA02g12230D	Late embryogenesis abundant (LEA) hydroxyproline-rich glycoprotein family	1.44161	1.46571e-05
BnaC08g30370D	Beta-glucosidase 16	1.44024	0.0427003
BnaC07g46050D	Cytochrome P450 84A1	1.43757	1.60687e-06
BnaA03g41970D	Protein farnesyltransferase/geranylgeranyltransferase type-1 subunit alpha	1.43645	1.857e-17
BnaC07g35300D	Ras-related protein RABA1e	1.43547	0.000139458
BnaC07g28420D	Calmodulin-binding protein 60 G	1.43438	0.00388142
BnaC02g28850D	HXXXD-type acyl-transferase family protein	1.4328	0.00472211
BnaA08g16100D	Tryptophan N-monooxygenase 1	1.4328	0.0120425
BnaA04g14230D	alpha/beta-Hydrolases superfamily protein	1.43267	0.0221028
BnaCnng47170D	Adenylyl-sulfate kinase 1, chloroplastic	1.43132	2.84964e-08
BnaA03g36080D	Mannosyl-oligosaccharide 1,2-alpha-mannosidase MNS2	1.43012	0.0173489
BnaA05g05860D	Eukaryotic aspartyl protease family protein	1.42766	0.0122348
BnaA04g02490D	Glucan endo-1,3-beta-glucosidase, acidic isoform	1.4233	0.0302741
BnaA02g12160D	Endoglucanase 7	1.41839	9.25026e-06
BnaA03g38480D	Somatic embryogenesis receptor kinase 4	1.41685	0.0335542
BnaC06g25020D	Glutathione S-transferase U11	1.41536	0.00020942
BnaC09g17380D	F-box/kelch-repeat protein At5g43190	1.41497	0.0311816
BnaC06g35540D	Isochorismate synthase 1, chloroplastic	1.41238	0.0238462
BnaA09g44500D	Transcription factor MYB51	1.41206	0.0227051
BnaC07g05930D	Arabidopsis phospholipase-like protein (PEARLI 4) family	1.41061	0.00022144
BnaA06g17630D	Glycosyl hydrolase family protein	1.41029	0.0418767
BnaA03g39800D	receptor-like protein kinase 1	1.40966	0.00840447
BnaC06g37280D	NAD(P)-binding Rossmann-fold superfamily protein	1.4082	0.00326813
BnaC01g25960D	O-acyltransferase (WSD1-like) family protein	1.40432	0.000131054
BnaA09g55500D	Beta-glucosidase 16	1.40404	0.000248105
BnaC09g08690D	Peroxidase 32	1.40333	0.000393707
BnaC09g22350D	cfe protein	1.40318	0.000708201
BnaC06g19670D	Wall-associated receptor kinase-like 9	1.40257	5.42179e-07
BnaA04g21740D	SOUL heme-binding family protein	1.40211	0.000595317
BnaC02g28390D	Copper amine oxidase family protein	1.39973	0.00577433
BnaC07g20470D	Adenine nucleotide alpha hydrolases-like superfamily protein	1.39754	0.00836588
BnaCnng05510D	Glycerophosphodiester phosphodiesterase GDPD1, chloroplastic	1.39323	0.000201602
BnaC02g00440D	Sulfate transporter 2.1	1.387	0.0476244
BnaCnng25710D	Cysteine-rich receptor-like protein kinase 36	1.38522	0.0375126
BnaA01g15000D	Probable xyloglucan endotransglucosylase/hydrolase protein 23	1.38441	0.0317489
BnaA09g53760D	Peroxidase 37	1.38287	0.0192045
BnaA02g30600D	Protein GAMETE EXPRESSED 2	1.37804	0.0132966
BnaA05g19550D	Ras-related small GTP-binding family protein	1.37716	0.00353867
BnaA09g07440D	Subtilisin-like protease SBT1.7	1.37407	0.041734
BnaC03g45680D	Plant basic secretory protein (BSP) family protein	1.37293	1.10796e-05
BnaC03g05850D	Aldolase-type TIM barrel family protein	1.37272	0.00909183
BnaCnng20960D	U-box domain-containing protein 36	1.36538	0.0290546
BnaC04g45590D	SOUL heme-binding family protein	1.36417	0.00072316
BnaA03g53750D	Heat stress transcription factor B-1	1.36201	0.0231775
BnaC04g20510D	E3 ubiquitin-protein ligase RHA1B-like	1.36188	0.0241954
BnaA09g26990D	Putative F-box/FBD/LRR-repeat protein At1g16940	1.36062	0.0298051
BnaA09g24110D	Subtilisin-like protease SBT3.5	1.35969	0.042531
BnaC05g01470D	Beta-glucosidase 11	1.35796	0.0455318
BnaC09g12480D	Late embryogenesis abundant (LEA) hydroxyproline-rich glycoprotein family	1.35692	0.0418913
BnaC04g43540D	Vesicle-associated membrane protein 722	1.35503	0.00911625
BnaA07g26080D	Probable inactive leucine-rich repeat receptor-like protein kinase At1g66830	1.35136	0.00337585
BnaA04g22280D	Inorganic phosphate transporter 1-4	1.35101	0.0455318
BnaC09g19320D	Probable WRKY transcription factor 8	1.35086	0.0195182
BnaA10g03720D	UDP-glycosyltransferase 75B1	1.34749	0.0272561
BnaC03g06010D	Protein ZINC INDUCED FACILITATOR 1	1.34238	0.0216451
BnaC01g03440D	SBP (S-ribonuclease binding protein) family protein	1.34218	0.0315006
BnaCnng75720D	Cation/calcium exchanger 1	1.34141	7.63287e-05
BnaA08g11390D	UDP-glucosyl transferase 73B2	1.33942	9.19503e-05
BnaA03g01690D	Anthranilate synthase alpha subunit 1, chloroplastic	1.33362	0.00205144
BnaC06g00640D	IAA-amino acid hydrolase ILR1-like 6	1.33223	0.002236
BnaA04g25720D	Beta-glucosidase 15	1.33192	0.0188377
BnaCnng57900D	Glutamine synthetase cytosolic isozyme 1-3	1.32754	0.0472197
BnaA08g11930D	calmodulin-binding family protein	1.32741	0.0346017
BnaA01g24920D	#N/A	1.32544	0.034425
BnaC06g19690D	Wall-associated receptor kinase-like 9	1.32438	0.0344254
BnaA01g00900D	Methylesterase 9	1.32114	0.0180889
BnaC09g41480D	NC domain-containing protein-related	1.32065	0.0290546
BnaA09g41960D	Spermidine sinapoyl CoA acyltransferase	1.31557	3.85645e-11
BnaA07g03350D	Arabidopsis phospholipase-like protein (PEARLI 4) family	1.31546	4.48952e-05
BnaCnng26390D	LOW QUALITY PROTEIN: UPF0496 protein At5g66670-like	1.31445	0.0349152
BnaC03g53780D	Arogenate dehydratase/prephenate dehydratase 6, chloroplastic	1.31382	0.00747385
BnaA10g11480D	P-loop containing nucleoside triphosphate hydrolases superfamily protein	1.31167	0.0474194
BnaA08g04520D	Cytochrome P450 83B1	1.31116	0.00359582
BnaA09g20400D	Cysteine-rich receptor-like protein kinase 40	1.30985	0.0254339
BnaC03g58430D	Purine permease 1	1.30672	0.0319179
BnaA07g21910D	thaumatin-like protein 3	1.30018	0.0270967
BnaC01g14030D	Probable trehalose-phosphate phosphatase G	1.30014	0.0338378
BnaA09g49480D	receptor like protein 1	1.29995	0.0178038
BnaC05g13910D	Receptor-like protein 12	1.2989	0.0141631
BnaA01g10650D	Probable UDP-arabinose 4-epimerase 3	1.2982	0.00738769
BnaAnng28220D	Calmodulin-binding protein 60 G	1.29555	0.00387059
BnaC05g04990D	Internal alternative NAD(P)H-ubiquinone oxidoreductase A1, mitochondrial	1.29459	0.0212751
BnaA08g20880D	UDP-glycosyltransferase 85A5	1.29384	0.0454928
BnaA07g16580D	Patatin-like protein 7	1.29332	0.000879059
BnaC04g52810D	E3 ubiquitin-protein ligase ATL41	1.28422	0.0118641
BnaAnng41650D	Probable WRKY transcription factor 48	1.27905	0.040261
BnaA09g19980D	External alternative NAD(P)H-ubiquinone oxidoreductase B2, mitochondrial	1.27597	2.85239e-07
BnaC09g37040D	Sucrose synthase 1	1.27388	0.0272108
BnaA01g32220D	exocyst subunit exo70 family protein H4	1.27048	2.30519e-08
BnaA03g45460D	SAUR-like auxin-responsive protein family	1.26986	0.0277972
BnaA03g16020D	Fatty acid 2-hydroxylase 1	1.26969	0.00040251
BnaA06g38160D	fucosyltransferase 6	1.26863	0.0484047
BnaC07g45720D	Probable serine/threonine-protein kinase Cx32, chloroplastic	1.2672	0.0221028
BnaA03g15270D	Probable inorganic phosphate transporter 1-5	1.26484	0.0234013
BnaA02g08420D	Cytokinin dehydrogenase 3	1.26004	0.0177367
BnaC07g17980D	Calcium-binding protein CML42	1.25565	0.0435601
BnaA03g08110D	Sucrose synthase 1	1.25501	0.0360865
BnaC07g36430D	Reticuline oxidase-like protein	1.25075	0.000536878
BnaC09g47650D	Serine carboxypeptidase-like 35	1.24936	0.0257765
BnaC01g03360D	Lysine histidine transporter-like 7	1.24792	0.00038409
BnaC03g11750D	Probable LRR receptor-like serine/threonine-protein kinase At5g59680	1.24708	0.0444201
BnaCnng08300D	Isochorismate synthase 1, chloroplastic	1.24637	0.00101797
BnaA02g21420D	Copper amine oxidase family protein	1.24076	0.0110719
BnaA03g53940D	cytochrome P450, family 81, subfamily D, polypeptide 8	1.2384	0.00814637
BnaA01g26430D	Polyol transporter 5	1.23329	0.0299242
BnaC02g37250D	Xyloglucan glycosyltransferase 4	1.23243	0.0330616
BnaCnng56320D	Heat stress transcription factor B-1	1.2318	0.000344645
BnaA08g23190D	Alanine aminotransferase 1, mitochondrial	1.22773	0.00318274
BnaCnng14480D	Amino acid permease 6	1.22621	0.0157843
BnaC06g22820D	Isochorismate synthase 1, chloroplastic	1.22552	0.0126878
BnaC08g05690D	Cytochrome P450 83B1	1.22149	0.00579801
BnaC09g36830D	Hyccin	1.21919	0.0200262
BnaC04g34510D	U-box domain-containing protein 21	1.21361	0.0131423
BnaA01g05280D	Enhanced disease susceptibility 5	1.21144	0.0422319
BnaC04g40510D	Metal tolerance protein B	1.2105	9.56786e-05
BnaA10g00970D	Mannan endo-1,4-beta-mannosidase 1	1.20582	0.00338769
BnaCnng41920D	structural constituent of ribosome	1.19891	0.0177544
BnaC04g49630D	Beta-glucosidase 15	1.19287	0.0480783
BnaC01g11500D	Probable xyloglucan endotransglucosylase/hydrolase protein 29	1.18974	0.0455318
BnaA09g35520D	Glucose-methanol-choline (GMC) oxidoreductase family protein	1.18468	0.00287347
BnaC07g46480D	cytochrome P450, family 81, subfamily D, polypeptide 8	1.18076	0.0131016
BnaCnng18530D	ARM repeat superfamily protein	1.18072	2.39178e-05
BnaAnng11660D	SBP (S-ribonuclease binding protein) family protein	1.18065	0.00111114
BnaC04g52400D	myb domain protein 2	1.17472	0.0424267
BnaA03g04410D	Sulfate transporter 4.1, chloroplastic	1.17108	0.0462992
BnaC06g23560D	alpha/beta-Hydrolases superfamily protein	1.17102	0.000470098
BnaA09g02800D	Protein kinase family protein	1.17099	0.019536
BnaA03g32340D	Nudix hydrolase 16, mitochondrial	1.16905	0.0276249
BnaA07g31450D	Protein kinase superfamily protein	1.16875	0.0229492
BnaC09g03670D	Sugar transport protein 13	1.16554	0.00613774
BnaC03g34490D	Sugar transport protein 6	1.16446	4.72753e-07
BnaA04g06580D	receptor like protein 48	1.16421	0.0438506
BnaCnng76260D	Late embryogenesis abundant (LEA) hydroxyproline-rich glycoprotein family	1.16276	0.00164351
BnaA03g14140D	Glutathione S-transferase F9	1.16186	0.0241954
BnaC07g29610D	Probable folate-biopterin transporter 2	1.1613	0.0368496
BnaA01g24930D	septum-promoting GTP-binding protein 1-like	1.15081	0.00820931
BnaC08g28320D	Agamous-like MADS-box protein AGL18	1.14573	0.0180889
BnaC07g36650D	Aldolase-type TIM barrel family protein	1.13921	0.0214252
BnaC07g44780D	Cyclase family protein	1.13808	0.00989127
BnaA03g50940D	Cyclase family protein	1.13762	0.00904446
BnaC03g71800D	Glucose-6-phosphate/phosphate translocator 1, chloroplastic	1.13229	0.00946938
BnaA07g33720D	Beta-1,3-galactosyltransferase 7	1.12931	0.000310871
BnaA10g08770D	IAA-amino acid hydrolase ILR1-like 6	1.12865	0.0263848
BnaC06g27190D	Probable metal-nicotianamine transporter YSL7	1.12674	0.0101714
BnaA07g28460D	Glutathione S-transferase U12	1.12609	0.000664107
BnaAnng33700D	UDP-galactose/UDP-glucose transporter 4	1.12598	0.0293829
BnaA01g23770D	MATE efflux family protein ALF5	1.12473	0.00760507
BnaC04g50320D	Cytochrome P450 76C2	1.12073	0.00696387
BnaC01g26060D	Cysteine proteinases superfamily protein	1.11822	0.00346799
BnaC01g16280D	Phosphorylase superfamily protein	1.11778	0.0051413
BnaAnng27200D	Cytosolic sulfotransferase 16	1.11067	0.000341025
BnaUnng05120D	pyruvate orthophosphate dikinase	1.11053	0.00311484
BnaC09g31460D	Pyruvate decarboxylase 2	1.10538	0.00426088
BnaA04g11530D	Phenolic glucoside malonyltransferase 1	1.10223	0.0177367
BnaC03g43810D	Aldehyde dehydrogenase family 2 member C4	1.09671	0.00521426
BnaC03g74630D	MATE efflux family protein	1.09569	0.0290546
BnaA03g24340D	Sodium transporter HKT1	1.0938	0.0239993
BnaC01g12180D	Probable UDP-arabinose 4-epimerase 3	1.09167	0.0145952
BnaA10g16940D	Cation/calcium exchanger 1	1.08968	0.0095402
BnaA05g34380D	probable polyamine oxidase 2	1.08893	0.000144993
BnaA10g08830D	Eukaryotic aspartyl protease family protein	1.08399	0.0369983
BnaAnng38490D	Cation/H(+) antiporter 20	1.08234	0.0186833
BnaA09g08410D	Adenylyl-sulfate kinase 1, chloroplastic	1.08212	0.0455318
BnaA05g05330D	transmembrane protein-related	1.08181	0.0318672
BnaA03g00310D	Potential natural antisense gene, locus overlaps with AT5G01540	1.0801	0.024484
BnaA07g28390D	Protein NRT1/ PTR FAMILY 2.13	1.07717	0.00343826
BnaC03g77460D	Class I glutamine amidotransferase-like superfamily protein	1.07711	0.00443202
BnaC04g39030D	Protein STRICTOSIDINE SYNTHASE-LIKE 9	1.07231	0.000129642
BnaA05g16830D	ATP sulfurylase 1, chloroplastic	1.07086	2.30759e-08
BnaCnng15960D	NAC domain-containing protein 8	1.07075	0.0170861
BnaA04g28640D	Metal tolerance protein B	1.06581	7.85246e-05
BnaA02g27860D	Cytochrome P450 71B22	1.0584	0.0302741
BnaA10g16850D	Anthranilate phosphoribosyltransferase, chloroplastic	1.04226	0.0308669
BnaA08g26300D	Germin-like protein subfamily 2 member 1	1.03798	0.024484
BnaA02g05220D	Leucine-rich repeat (LRR) family protein	1.03622	0.0397396
BnaA09g45460D	MACPF domain-containing protein At1g14780	1.03573	0.00563318
BnaC08g27260D	Alpha-galactosidase 3	1.03509	0.00803349
BnaC06g38340D	Beta-1,3-galactosyltransferase 7	1.02818	0.019127
BnaC07g28600D	probable L-cysteine desulfhydrase, chloroplastic	1.02571	0.0221028
BnaA08g08940D	Heat stress transcription factor A-4a	1.02161	0.0177367
BnaA07g20290D	phosphoglycerate kinase	1.01979	0.00304927
BnaC01g06660D	Probable WRKY transcription factor 60	1.01961	0.0267945
BnaA09g21860D	1-aminocyclopropane-1-carboxylate synthase 6	1.01704	0.0183608
BnaC01g31820D	UDP-glycosyltransferase 71B2	1.00863	3.97427e-05
BnaC01g01790D	Heat stress transcription factor B-1	1.00429	0.0242764
BnaA04g17900D	2-oxoglutarate (2OG) and Fe(II)-dependent oxygenase superfamily protein	1.00101	0.000450201

## Sheet: Comp vs Basal_UP_regulated_DEGs
Up-regulated DEGs identified by comparing 'Comp' versus 'Basal'.
Gene_ID	Annotation	Log2_fold_change	padj
BnaAnng14900D	Two-component response regulator ARR10	4.24155	3.04164e-14
BnaC01g38190D	2-oxoglutarate (2OG) and Fe(II)-dependent oxygenase superfamily protein	4.09969	3.13275e-11
BnaA02g18220D	ERAD-associated E3 ubiquitin-protein ligase component HRD3B	3.86378	1.38604e-07
BnaC01g26790D	Sugar transporter ERD6-like 5	3.5135	2.85727e-08
BnaA04g01370D	Beta-glucosidase 16	3.42032	2.52286e-08
BnaA03g58560D	Probable beta-1,3-galactosyltransferase 20	3.3492	6.15847e-06
BnaCnng24530D	Putative zinc transporter At3g08650	3.2213	1.83509e-06
BnaA06g33980D	Nucleic acid-binding, OB-fold-like protein	3.10795	6.54925e-05
BnaA05g08660D	EID1-like F-box protein 3	3.04368	1.69272e-05
BnaC06g12640D	#N/A	3.02739	3.95929e-05
BnaA09g29740D	#N/A	2.90815	6.17754e-05
BnaC07g12450D	#N/A	2.90376	1.90141e-05
BnaA07g29850D	ACT-like protein tyrosine kinase family protein	2.8998	1.4194e-05
BnaC05g30440D	#N/A	2.85146	1.74476e-05
BnaCnng21690D	Bifunctional UDP-glucose 4-epimerase and UDP-xylose 4-epimerase 1	2.80124	0.00142408
BnaA02g12840D	Ribulose bisphosphate carboxylase small chain 1A, chloroplastic	2.7794	2.98827e-07
BnaCnng73840D	glutathione S-transferase T3-like	2.69731	0.000517506
BnaCnng70520D	Nucleolar 27S pre-rRNA processing, Urb2/Npa2	2.68666	0.00096216
BnaC05g39200D	9-cis-epoxycarotenoid dioxygenase NCED3, chloroplastic	2.68278	1.83008e-06
BnaC07g50590D	Ethylene-responsive transcription factor ERF054	2.67143	6.54925e-05
BnaC07g36550D	Probable beta-1,3-galactosyltransferase 20	2.57653	0.00616185
BnaA01g20840D	Mitogen-activated protein kinase 16	2.56817	0.00225957
BnaC08g12880D	Ethylene-responsive transcription factor ERF054	2.56043	3.19136e-06
BnaA06g17370D	#N/A	2.54456	0.00143548
BnaA03g33400D	9-cis-epoxycarotenoid dioxygenase NCED3, chloroplastic	2.53258	0.000748508
BnaA06g05320D	Transcription factor bHLH149	2.50979	0.00470723
BnaA04g20270D	Protein TIFY 5B	2.49978	0.010126
BnaA02g05790D	histone deacetylase HDT2-like	2.49313	0.00358952
BnaA01g12340D	SAUR-like auxin-responsive protein family	2.47144	0.0025918
BnaA03g05290D	tyrosyl-DNA phosphodiesterase-related	2.4674	0.00194375
BnaA01g29390D	9-cis-epoxycarotenoid dioxygenase NCED3, chloroplastic	2.46014	6.63868e-09
BnaCnng32090D	9-cis-epoxycarotenoid dioxygenase NCED3, chloroplastic	2.45987	1.34365e-05
BnaC09g09740D	alpha/beta-Hydrolases superfamily protein	2.42956	3.76018e-05
BnaC02g33910D	LOW QUALITY PROTEIN: uncharacterized protein At2g29880-like	2.38925	1.38604e-07
BnaA08g01300D	Ethylene-responsive transcription factor 8	2.3863	0.00165448
BnaA07g30030D	#N/A	2.37581	6.05782e-09
BnaA08g03010D	glutathione S-transferase T3-like	2.37397	0.00941704
BnaA08g28870D	loricrin-like	2.37161	4.50483e-05
BnaA08g17540D	Protein TIFY 5A	2.34514	0.00711969
BnaC01g20260D	#N/A	2.33946	0.0108341
BnaCnng20300D	nucleic acid binding;zinc ion binding	2.33703	0.0186917
BnaC07g11700D	Zinc finger protein ZAT10	2.30892	0.000604994
BnaC01g04740D	#N/A	2.28982	0.0297443
BnaC05g11970D	Protein ROOT INITIATION DEFECTIVE 3	2.27854	0.00722976
BnaC01g20660D	Ethylene-responsive transcription factor ERF054	2.26925	0.00076245
BnaA08g13860D	Ethylene-responsive transcription factor ERF054	2.25877	5.08657e-05
BnaA09g42280D	GTP-binding protein At2g22870	2.25319	0.00349591
BnaA03g15910D	protein TIFY 5B-like	2.23171	0.0413021
BnaAnng26610D	Ethylene-responsive transcription factor ERF017	2.21599	0.0367151
BnaC02g45380D	F-box protein At1g30790-like	2.21016	0.0463658
BnaA05g25030D	9-cis-epoxycarotenoid dioxygenase NCED3, chloroplastic	2.20277	0.000849387
BnaC06g35730D	Ethylene-responsive transcription factor ERF018	2.20193	0.0392859
BnaA03g53590D	Nucleic acid-binding, OB-fold-like protein	2.18425	0.0152673
BnaC01g36910D	9-cis-epoxycarotenoid dioxygenase NCED3, chloroplastic	2.16622	6.44698e-08
BnaA01g33320D	Starch synthase 2, chloroplastic/amyloplastic	2.16315	0.00941704
BnaA03g33390D	9-cis-epoxycarotenoid dioxygenase NCED3, chloroplastic	2.1568	0.000247265
BnaC08g34740D	GTP-binding protein At2g22870	2.14395	0.0185241
BnaC04g49870D	Ethylene-responsive transcription factor 13	2.13508	0.0479254
BnaC02g28140D	Late embryogenesis abundant 3 (LEA3) family protein	2.12697	0.0391773
BnaA04g25900D	Ethylene-responsive transcription factor 13	2.09431	0.0358771
BnaA01g36830D	#N/A	2.09392	0.0463658
BnaA09g42050D	#N/A	2.09052	0.0254663
BnaC04g09800D	EID1-like F-box protein 3	2.08571	0.0479254
BnaC06g16950D	Putative F-box/LRR-repeat protein At5g38386	2.0774	5.08657e-05
BnaC09g34350D	Probable protein phosphatase 2C 78	2.06751	0.0343865
BnaA02g36510D	Late embryogenesis abundant 3 (LEA3) family protein	2.0655	0.00360932
BnaC04g45730D	GDSL esterase/lipase At2g38180	2.06351	0.000243776
BnaA10g12140D	Probable protein phosphatase 2C 78	2.04253	0.0254663
BnaA10g09120D	cysteine-type peptidases;cysteine-type peptidases	2.04071	0.0319122
BnaC09g50030D	#N/A	2.02748	0.0455808
BnaA03g28150D	ARM repeat superfamily protein	2.02257	0.0192995
BnaCnng24520D	ethylene-responsive transcription factor ERF114	2.00449	0.000604994
BnaC07g10320D	Glutaredoxin-C9	1.99429	0.0130591
BnaA07g08330D	Glutaredoxin-C9	1.99315	0.00543718
BnaC07g05810D	#N/A	1.98561	0.00112596
BnaA09g27230D	Glutaredoxin-C9	1.97224	0.0343865
BnaA02g18610D	Nitrate reductase	1.97004	0.0171286
BnaCnng63180D	ethylene-responsive transcription factor 11-like	1.96239	0.00867367
BnaA08g03000D	nuclease harbi1	1.94472	0.0108341
BnaA09g27300D	ethylene-responsive transcription factor 11-like	1.94204	0.0306011
BnaAnng29660D	Ethylene-responsive transcription factor ERF053	1.93621	0.0458127
BnaC03g11320D	tRNA(His) guanylyltransferase 1	1.91544	0.019402
BnaC07g39980D	CCT motif family protein	1.91007	0.0468222
BnaA03g49050D	Ethylene-responsive transcription factor ERF054	1.9057	0.0257235
BnaA04g21410D	Zinc finger protein ZAT11	1.89467	0.0267
BnaC03g49910D	splicing factor, putative	1.8906	0.00689824
BnaC03g60450D	protein pxr1-like	1.88209	0.0327017
BnaA03g51190D	#N/A	1.87773	0.0210863
BnaC06g37160D	RING-H2 finger protein ATL8	1.87425	0.0118268
BnaA09g05740D	Gamma-aminobutyrate transaminase POP2, mitochondrial	1.86415	2.04777e-05
BnaA10g14100D	Probable CCR4-associated factor 1 homolog 11	1.8327	0.0217815
BnaC02g09390D	Probable CCR4-associated factor 1 homolog 11	1.82832	0.0184978
BnaCnng32080D	9-cis-epoxycarotenoid dioxygenase NCED3, chloroplastic	1.79632	0.000108915
BnaC06g05910D	NAC domain-containing protein 19	1.78979	0.0392859
BnaC03g06820D	tyrosyl-DNA phosphodiesterase-related	1.76881	0.000709639
BnaA06g01090D	Ethylene-responsive transcription factor 8	1.7625	0.0299753
BnaC01g02240D	Pentatricopeptide repeat-containing protein At5g66500, mitochondrial	1.75202	0.0423249
BnaC07g36460D	ethylene-responsive nuclear protein -related	1.73222	0.0227267
BnaC01g36330D	Ethylene-responsive transcription factor 4	1.7303	0.0350504
BnaA02g05510D	Probable CCR4-associated factor 1 homolog 11	1.72552	0.0303955
BnaA09g36180D	VQ motif-containing protein	1.70785	0.0347935
BnaA08g16650D	protein pxr1-like	1.67675	0.0331577
BnaC01g15640D	Probable WRKY transcription factor 53	1.67653	0.0439399
BnaCnng67070D	ethylene-responsive transcription factor 11-like	1.67645	0.0327017
BnaA02g14860D	nonsense-mediated mrna decay protein 2-like	1.66489	0.00260304
BnaC03g39000D	Ethylene-responsive transcription factor 4	1.66225	0.0283516
BnaA09g08810D	Major facilitator superfamily protein	1.6512	0.0193033
BnaC06g40170D	Probable WRKY transcription factor 40	1.61905	0.0198007
BnaA05g24390D	Ethylene-responsive transcription factor 4	1.61545	0.0334665
BnaC04g05320D	protein EARLY FLOWERING 4	1.61315	0.0240767
BnaA07g35260D	Probable WRKY transcription factor 40	1.5876	0.000526721
BnaA02g29610D	Biotin/lipoate A/B protein ligase family	1.57663	0.0334207
BnaC07g48760D	Probable E3 ubiquitin-protein ligase RHA2B	1.57197	0.0227267
BnaC05g33170D	Zinc finger protein AZF2	1.56585	0.0192419
BnaA08g14900D	Arabidopsis protein of unknown function (DUF241)	1.56275	0.000235657
BnaA10g00280D	NAC domain-containing protein 2	1.50124	0.00432598
BnaA09g38470D	Homeobox-leucine zipper protein HAT3	1.4987	0.0474708
BnaAnng14710D	extensin-like [Brassica oleracea var. oleracea]	1.48102	0.0392859
BnaA03g33790D	Ethylene-responsive transcription factor 4	1.46077	0.0283447
BnaA02g19730D	VQ motif-containing protein 11	1.44676	0.0474708
BnaC02g35150D	Cytosolic sulfotransferase 12	1.43996	0.000709639
BnaC01g07430D	Transcription factor bHLH69	1.42689	0.0330558
BnaA07g12410D	Calcium uniporter protein 3, mitochondrial	1.37936	0.0439323
BnaC06g23550D	Mitogen-activated protein kinase kinase 9	1.35341	0.0439399
BnaA01g02600D	nucleolar protein 58-like	1.34074	0.0025918
BnaA06g18470D	Transducin/WD40 repeat-like superfamily protein	1.32476	0.000634143
BnaCnng28320D	#N/A	1.31257	0.0184978
BnaC09g02080D	Ninja-family protein AFP3	1.29178	0.00512226
BnaC06g36220D	Cytokinin dehydrogenase 5	1.26771	0.0158306
BnaA06g12870D	myb domain protein 47	1.26523	0.0254663
BnaC05g00370D	NAC domain-containing protein 2	1.22368	0.0412627
BnaA01g00260D	GRF1-interacting factor 1	1.08972	0.0346408
BnaA02g27300D	Cytosolic sulfotransferase 12	1.08319	0.00616185
BnaCnng00510D	Probable E3 ubiquitin-protein ligase XERICO	1.06306	0.0450881
BnaC02g19870D	Phenolic glucoside malonyltransferase 2	1.03416	0.00941704
